# Supplementary material for: Characterization of Runs of Homozygosity, Heterozygosity-Enriched Regions, and Population Structure in Cattle Populations Selected for Different Breeding Goals
Source: Research Square preprint supplement (doi:10.21203/rs.3.rs-785546/v1), 2021-08-23
Supplement: Supplementary file 1 [file 7e4b5302f0f420a3b833c21d.xlsx]

## Sheet: Ensembl gene id
Nellore 50K - results Heterozygous-enriched regions
	group	CHR	BP1	BP2	chr	start_pos	end_pos	width	strand	gene_id	gene_name	gene_biotype
1	NEL50	1	63642322	65584086	1	63749635	63892877	143243	-	ENSBTAG00000045704	IGSF11	protein_coding
2	NEL50	1	63642322	65584086	1	63893356	63921879	28524	+	ENSBTAG00000054494	#N/A	lncRNA
3	NEL50	1	63642322	65584086	1	63957312	63961902	4591	+	ENSBTAG00000014157	#N/A	protein_coding
4	NEL50	1	63642322	65584086	1	63981593	64010650	29058	+	ENSBTAG00000009014	UPK1B	protein_coding
5	NEL50	1	63642322	65584086	1	64019141	64049977	30837	-	ENSBTAG00000001390	B4GALT4	protein_coding
6	NEL50	1	63642322	65584086	1	64083127	64203306	120180	+	ENSBTAG00000000210	ARHGAP31	protein_coding
7	NEL50	1	63642322	65584086	1	64211525	64240562	29038	-	ENSBTAG00000000213	TMEM39A	protein_coding
8	NEL50	1	63642322	65584086	1	64246626	64269696	23071	+	ENSBTAG00000008562	POGLUT1	protein_coding
9	NEL50	1	63642322	65584086	1	64275417	64295231	19815	+	ENSBTAG00000012581	TIMMDC1	protein_coding
10	NEL50	1	63642322	65584086	1	64301489	64323696	22208	-	ENSBTAG00000018059	CD80	protein_coding
11	NEL50	1	63642322	65584086	1	64334745	64377235	42491	+	ENSBTAG00000009391	ADPRH	protein_coding
12	NEL50	1	63642322	65584086	1	64397770	64415902	18133	-	ENSBTAG00000005604	POPDC2	protein_coding
13	NEL50	1	63642322	65584086	1	64425088	64432940	7853	-	ENSBTAG00000002182	COX17	protein_coding
14	NEL50	1	63642322	65584086	1	64451181	64565304	114124	+	ENSBTAG00000001293	CFAP91	protein_coding
15	NEL50	1	63642322	65584086	1	64545597	64545719	123	+	ENSBTAG00000044376	#N/A	snoRNA
16	NEL50	1	63642322	65584086	1	64603582	64604189	608	+	ENSBTAG00000053648	#N/A	protein_coding
17	NEL50	1	63642322	65584086	1	64606698	64639471	32774	+	ENSBTAG00000019557	NR1I2	protein_coding
18	NEL50	1	63642322	65584086	1	64646190	64861271	215082	-	ENSBTAG00000048057	GSK3B	protein_coding
19	NEL50	1	63642322	65584086	1	64851586	64851695	110	-	ENSBTAG00000055108	#N/A	miRNA
20	NEL50	1	63642322	65584086	1	64938048	65020584	82537	-	ENSBTAG00000001464	GPR156	protein_coding
21	NEL50	1	63642322	65584086	1	65078552	65096582	18031	-	ENSBTAG00000033170	LRRC58	protein_coding
22	NEL50	1	63642322	65584086	1	65138529	65198315	59787	-	ENSBTAG00000022155	FSTL1	protein_coding
23	NEL50	1	63642322	65584086	1	65235359	65235744	386	-	ENSBTAG00000048370	#N/A	protein_coding
24	NEL50	1	63642322	65584086	1	65318371	65324506	6136	+	ENSBTAG00000015892	NDUFB4	protein_coding
25	NEL50	1	63642322	65584086	1	65337969	65380604	42636	-	ENSBTAG00000015895	HGD	protein_coding
26	NEL50	1	63642322	65584086	1	65387679	65433970	46292	-	ENSBTAG00000015898	RABL3	protein_coding
27	NEL50	1	63642322	65584086	1	65433369	65474553	41185	+	ENSBTAG00000016848	GTF2E1	protein_coding
28	NEL50	1	63642322	65584086	1	65444286	65444408	123	-	ENSBTAG00000045436	SNORA70	snoRNA
29	NEL50	2	36202336	37386478	2	36097616	36247251	149636	+	ENSBTAG00000009080	ITGB6	protein_coding
30	NEL50	2	36202336	37386478	2	36271243	36405254	134012	+	ENSBTAG00000032515	PLA2R1	protein_coding
31	NEL50	2	36202336	37386478	2	36398029	36398164	136	+	ENSBTAG00000042933	#N/A	snoRNA
32	NEL50	2	36202336	37386478	2	36454504	36545934	91431	+	ENSBTAG00000017797	LY75	protein_coding
33	NEL50	2	36202336	37386478	2	36552660	36579199	26540	+	ENSBTAG00000038195	CD302	protein_coding
34	NEL50	2	36202336	37386478	2	36579472	36627161	47690	-	ENSBTAG00000008755	MARCHF7	protein_coding
35	NEL50	2	36202336	37386478	2	36632510	36636153	3644	+	ENSBTAG00000054190	#N/A	protein_coding
36	NEL50	2	36202336	37386478	2	36715262	37045806	330545	+	ENSBTAG00000020654	BAZ2B	protein_coding
37	NEL50	2	36202336	37386478	2	37061967	37131114	69148	+	ENSBTAG00000004184	WDSUB1	protein_coding
38	NEL50	2	36202336	37386478	2	37135008	37386059	251052	-	ENSBTAG00000004177	TANC1	protein_coding
39	NEL50	5	72914856	79046211	5	73357105	73374540	17436	+	ENSBTAG00000007674	ISX	protein_coding
40	NEL50	5	72914856	79046211	5	73508916	73543335	34420	+	ENSBTAG00000010533	HMGXB4	protein_coding
41	NEL50	5	72914856	79046211	5	73547847	73588700	40854	+	ENSBTAG00000045785	TOM1	protein_coding
42	NEL50	5	72914856	79046211	5	73623293	73630548	7256	+	ENSBTAG00000015582	HMOX1	protein_coding
43	NEL50	5	72914856	79046211	5	73633313	73651860	18548	+	ENSBTAG00000015595	MCM5	protein_coding
44	NEL50	5	72914856	79046211	5	73749045	73760542	11498	+	ENSBTAG00000017116	RASD2	protein_coding
45	NEL50	5	72914856	79046211	5	73814162	73829888	15727	-	ENSBTAG00000005333	MB	protein_coding
46	NEL50	5	72914856	79046211	5	73866614	73874122	7509	+	ENSBTAG00000049066	#N/A	protein_coding
47	NEL50	5	72914856	79046211	5	73899444	74189188	289745	-	ENSBTAG00000020125	RBFOX2	protein_coding
48	NEL50	5	72914856	79046211	5	74266329	74267210	882	+	ENSBTAG00000046392	#N/A	protein_coding
49	NEL50	5	72914856	79046211	5	74275836	74288145	12310	+	ENSBTAG00000049297	#N/A	protein_coding
50	NEL50	5	72914856	79046211	5	74303467	74319127	15661	+	ENSBTAG00000037799	#N/A	protein_coding
51	NEL50	5	72914856	79046211	5	74349226	74357538	8313	+	ENSBTAG00000052884	#N/A	protein_coding
52	NEL50	5	72914856	79046211	5	74358375	74359379	1005	-	ENSBTAG00000055135	#N/A	protein_coding
53	NEL50	5	72914856	79046211	5	74430343	74435609	5267	-	ENSBTAG00000053500	#N/A	lncRNA
54	NEL50	5	72914856	79046211	5	74439512	74452245	12734	-	ENSBTAG00000048740	#N/A	protein_coding
55	NEL50	5	72914856	79046211	5	74452850	74463537	10688	-	ENSBTAG00000053144	#N/A	lncRNA
56	NEL50	5	72914856	79046211	5	74480533	74487043	6511	-	ENSBTAG00000050417	#N/A	protein_coding
57	NEL50	5	72914856	79046211	5	74501674	74571162	69489	-	ENSBTAG00000039524	#N/A	protein_coding
58	NEL50	5	72914856	79046211	5	74561455	74585374	23920	+	ENSBTAG00000038652	#N/A	protein_coding
59	NEL50	5	72914856	79046211	5	74600517	74612469	11953	+	ENSBTAG00000040244	APOL3	protein_coding
60	NEL50	5	72914856	79046211	5	74623518	74628935	5418	-	ENSBTAG00000012192	#N/A	protein_coding
61	NEL50	5	72914856	79046211	5	74694651	74711373	16723	+	ENSBTAG00000000667	APOL3	protein_coding
62	NEL50	5	72914856	79046211	5	74719956	74805905	85950	-	ENSBTAG00000010402	MYH9	protein_coding
63	NEL50	5	72914856	79046211	5	74878042	74878145	104	-	ENSBTAG00000043161	U6	snRNA
64	NEL50	5	72914856	79046211	5	74883636	74893752	10117	-	ENSBTAG00000000014	TXN2	protein_coding
65	NEL50	5	72914856	79046211	5	74905031	74919112	14082	-	ENSBTAG00000000015	FOXRED2	protein_coding
66	NEL50	5	72914856	79046211	5	74925192	74939376	14185	-	ENSBTAG00000001988	EIF3D	protein_coding
67	NEL50	5	72914856	79046211	5	74968832	74971881	3050	-	ENSBTAG00000054427	#N/A	protein_coding
68	NEL50	5	72914856	79046211	5	74969135	75090284	121150	-	ENSBTAG00000010865	CACNG2	protein_coding
69	NEL50	5	72914856	79046211	5	75135020	75158505	23486	-	ENSBTAG00000026657	IFT27	protein_coding
70	NEL50	5	72914856	79046211	5	75145365	75145619	255	+	ENSBTAG00000008137	#N/A	protein_coding
71	NEL50	5	72914856	79046211	5	75159264	75168690	9427	+	ENSBTAG00000048453	#N/A	lncRNA
72	NEL50	5	72914856	79046211	5	75176504	75193657	17154	-	ENSBTAG00000019159	PVALB	protein_coding
73	NEL50	5	72914856	79046211	5	75265852	75284401	18550	+	ENSBTAG00000007531	NCF4	protein_coding
74	NEL50	5	72914856	79046211	5	75349088	75370432	21345	+	ENSBTAG00000009064	CSF2RB	protein_coding
75	NEL50	5	72914856	79046211	5	75406598	75407029	432	-	ENSBTAG00000032114	#N/A	processed_pseudogene
76	NEL50	5	72914856	79046211	5	75415497	75433378	17882	-	ENSBTAG00000030652	TEX33	protein_coding
77	NEL50	5	72914856	79046211	5	75435115	75442678	7564	-	ENSBTAG00000030650	TST	protein_coding
78	NEL50	5	72914856	79046211	5	75441888	75452001	10114	+	ENSBTAG00000030648	MPST	protein_coding
79	NEL50	5	72914856	79046211	5	75479863	75490596	10734	+	ENSBTAG00000030646	KCTD17	protein_coding
80	NEL50	5	72914856	79046211	5	75494237	75529894	35658	-	ENSBTAG00000032152	TMPRSS6	protein_coding
81	NEL50	5	72914856	79046211	5	75550213	75591439	41227	-	ENSBTAG00000016345	IL2RB	protein_coding
82	NEL50	5	72914856	79046211	5	75616456	75629565	13110	-	ENSBTAG00000008074	C1QTNF6	protein_coding
83	NEL50	5	72914856	79046211	5	75635774	75637042	1269	-	ENSBTAG00000008910	SSTR3	protein_coding
84	NEL50	5	72914856	79046211	5	75656456	75673313	16858	-	ENSBTAG00000011043	RAC2	protein_coding
85	NEL50	5	72914856	79046211	5	75672810	75672872	63	-	ENSBTAG00000045421	bta-mir-1835	miRNA
86	NEL50	5	72914856	79046211	5	75703658	75734563	30906	+	ENSBTAG00000014237	CYTH4	protein_coding
87	NEL50	5	72914856	79046211	5	75796037	75798511	2475	-	ENSBTAG00000007259	ELFN2	protein_coding
88	NEL50	5	72914856	79046211	5	75836154	75847802	11649	-	ENSBTAG00000054739	#N/A	lncRNA
89	NEL50	5	72914856	79046211	5	75887878	75903492	15615	-	ENSBTAG00000015043	MFNG	protein_coding
90	NEL50	5	72914856	79046211	5	75907210	75940103	32894	-	ENSBTAG00000015044	CARD10	protein_coding
91	NEL50	5	72914856	79046211	5	75946067	75946175	109	+	ENSBTAG00000042271	U6	snRNA
92	NEL50	5	72914856	79046211	5	75967297	75967403	107	-	ENSBTAG00000043029	U6	snRNA
93	NEL50	5	72914856	79046211	5	75988786	76019180	30395	+	ENSBTAG00000016661	USP18	protein_coding
94	NEL50	5	72914856	79046211	5	76107001	76113238	6238	-	ENSBTAG00000030632	ALG10	protein_coding
95	NEL50	5	72914856	79046211	5	76301501	76417740	116240	+	ENSBTAG00000000606	SYT10	protein_coding
96	NEL50	5	72914856	79046211	5	77001511	77154610	153100	+	ENSBTAG00000002651	PKP2	protein_coding
97	NEL50	5	72914856	79046211	5	77131742	77158404	26663	+	ENSBTAG00000011399	YARS2	protein_coding
98	NEL50	5	72914856	79046211	5	77144456	77205083	60628	-	ENSBTAG00000011395	DNM1L	protein_coding
99	NEL50	5	72914856	79046211	5	77234501	77463105	228605	-	ENSBTAG00000005453	FGD4	protein_coding
100	NEL50	5	72914856	79046211	5	77267741	77267847	107	+	ENSBTAG00000053145	U6	snRNA
101	NEL50	5	72914856	79046211	5	77487500	77732164	244665	-	ENSBTAG00000006734	BICD1	protein_coding
102	NEL50	5	72914856	79046211	5	77923734	77950862	27129	-	ENSBTAG00000004999	RESF1	protein_coding
103	NEL50	5	72914856	79046211	5	78176178	78261615	85438	+	ENSBTAG00000014156	AMN1	protein_coding
104	NEL50	5	72914856	79046211	5	78272231	78279920	7690	-	ENSBTAG00000000877	ETFBKMT	protein_coding
105	NEL50	5	72914856	79046211	5	78338829	78338929	101	+	ENSBTAG00000042848	U6	snRNA
106	NEL50	5	72914856	79046211	5	78374551	78590351	215801	+	ENSBTAG00000020315	DENND5B	protein_coding
107	NEL50	5	72914856	79046211	5	78658638	78688163	29526	+	ENSBTAG00000001161	SINHCAF	protein_coding
108	NEL50	5	72914856	79046211	5	78798259	78840817	42559	+	ENSBTAG00000019373	CAPRIN2	protein_coding
109	NEL50	5	72914856	79046211	5	78855488	78922350	66863	+	ENSBTAG00000014106	IPO8	protein_coding
110	NEL50	6	77309507	78206076	6	77075369	77651502	576134	+	ENSBTAG00000013918	ADGRL3	protein_coding
111	NEL50	6	77309507	78206076	6	77939029	77940315	1287	-	ENSBTAG00000053291	#N/A	protein_coding
112	NEL50	11	16880546	18643939	11	17276113	17277348	1236	+	ENSBTAG00000053165	#N/A	processed_pseudogene
113	NEL50	11	16880546	18643939	11	17395111	17395172	62	+	ENSBTAG00000044993	U7	snRNA
114	NEL50	17	54836020	55504746	17	54818687	55096432	277746	+	ENSBTAG00000008571	CUX2	protein_coding
115	NEL50	17	54836020	55504746	17	55101789	55111455	9667	-	ENSBTAG00000052103	#N/A	lncRNA
116	NEL50	17	54836020	55504746	17	55140724	55175813	35090	+	ENSBTAG00000009101	SH2B3	protein_coding
117	NEL50	17	54836020	55504746	17	55178853	55280779	101927	-	ENSBTAG00000022069	ATXN2	protein_coding
118	NEL50	17	54836020	55504746	17	55314762	55345115	30354	-	ENSBTAG00000001168	BRAP	protein_coding
119	NEL50	17	54836020	55504746	17	55349801	55448734	98934	+	ENSBTAG00000001164	ACAD10	protein_coding
120	NEL50	17	54836020	55504746	17	55355159	55391764	36606	+	ENSBTAG00000048331	#N/A	protein_coding
121	NEL50	17	54836020	55504746	17	55420458	55421052	595	-	ENSBTAG00000050648	#N/A	protein_coding
122	NEL50	17	54836020	55504746	17	55434294	55435295	1002	-	ENSBTAG00000051558	#N/A	protein_coding
123	NEL50	18	23656888	24920756	18	23752891	23780118	27228	+	ENSBTAG00000019267	MMP2	protein_coding
124	NEL50	18	23656888	24920756	18	23786207	23854907	68701	+	ENSBTAG00000019272	LPCAT2	protein_coding
125	NEL50	18	23656888	24920756	18	23827050	23827156	107	+	ENSBTAG00000051128	U6	snRNA
126	NEL50	18	23656888	24920756	18	23875374	23939382	64009	+	ENSBTAG00000003353	SLC6A2	protein_coding
127	NEL50	18	23656888	24920756	18	23935627	23936259	633	-	ENSBTAG00000032702	#N/A	processed_pseudogene
128	NEL50	18	23656888	24920756	18	23948128	23975139	27012	+	ENSBTAG00000011021	CES1	protein_coding
129	NEL50	18	23656888	24920756	18	23983413	24015657	32245	+	ENSBTAG00000001851	#N/A	protein_coding
130	NEL50	18	23656888	24920756	18	24023262	24026381	3120	-	ENSBTAG00000054808	MT1A	protein_coding
131	NEL50	18	23656888	24920756	18	24029352	24032186	2835	-	ENSBTAG00000038706	MT1E	protein_coding
132	NEL50	18	23656888	24920756	18	24034444	24035790	1347	-	ENSBTAG00000001595	MT1E	protein_coding
133	NEL50	18	23656888	24920756	18	24042348	24043480	1133	-	ENSBTAG00000023659	MT2A	protein_coding
134	NEL50	18	23656888	24920756	18	24051082	24052904	1823	-	ENSBTAG00000016886	MT3	protein_coding
135	NEL50	18	23656888	24920756	18	24060356	24061387	1032	-	ENSBTAG00000049147	#N/A	protein_coding
136	NEL50	18	23656888	24920756	18	24074703	24075719	1017	+	ENSBTAG00000049538	#N/A	protein_coding
137	NEL50	18	23656888	24920756	18	24080218	24082545	2328	-	ENSBTAG00000015084	MT4	protein_coding
138	NEL50	18	23656888	24920756	18	24122099	24148233	26135	+	ENSBTAG00000014923	BBS2	protein_coding
139	NEL50	18	23656888	24920756	18	24154462	24184693	30232	-	ENSBTAG00000001171	OGFOD1	protein_coding
140	NEL50	18	23656888	24920756	18	24181541	24181647	107	+	ENSBTAG00000055230	U6	snRNA
141	NEL50	18	23656888	24920756	18	24184906	24199512	14607	+	ENSBTAG00000010207	NUDT21	protein_coding
142	NEL50	18	23656888	24920756	18	24207779	24253288	45510	+	ENSBTAG00000003798	AMFR	protein_coding
143	NEL50	18	23656888	24920756	18	24255762	24437386	181625	-	ENSBTAG00000003794	GNAO1	protein_coding
144	NEL50	18	23656888	24920756	18	24682781	24710853	28073	+	ENSBTAG00000011164	CES5A	protein_coding
145	NEL50	18	23656888	24920756	18	24745103	24771960	26858	+	ENSBTAG00000001852	BREH1	protein_coding
146	NEL50	18	23656888	24920756	18	24773044	24773969	926	+	ENSBTAG00000053753	#N/A	protein_coding
147	NEL50	18	23656888	24920756	18	24796100	24898992	102893	+	ENSBTAG00000006611	NUP93	protein_coding
148	NEL50	18	23656888	24920756	18	24910562	24910671	110	+	ENSBTAG00000029938	MIR138-2	miRNA
149	NEL50	18	23656888	24920756	18	24914409	24953834	39426	+	ENSBTAG00000006630	SLC12A3	protein_coding
150	NEL50	20	22058725	22234357	20	22017006	22080506	63501	-	ENSBTAG00000012124	GPBP1	protein_coding
151	NEL50	20	22058725	22234357	20	22121630	22122022	393	+	ENSBTAG00000053164	#N/A	protein_coding
152	NEL50	23	588741	1284183	23	270838	961226	690389	-	ENSBTAG00000043990	KHDRBS2	protein_coding

## Sheet: 100 gene set
	geneSet	description	link	size	overlap	expect	enrichmentRatio	pValue	FDR	overlapId	userId
1	bta04978	Mineral absorption	http://www.kegg.jp/kegg-bin/show_pathway?bta04978+404070+513221+613358+768319	44	4	0.217062	18.4279	6.00049e-05	0.0193816	404070;513221;613358;768319	ENSBTAG00000015582;ENSBTAG00000038706;ENSBTAG00000001595;ENSBTAG00000023659
2	bta00920	Sulfur metabolism	http://www.kegg.jp/kegg-bin/show_pathway?bta00920+280946+507313	9	2	0.044399	45.0461	0.000836321	0.112203	280946;507313	ENSBTAG00000030650;ENSBTAG00000030648
3	bta04122	Sulfur relay system	http://www.kegg.jp/kegg-bin/show_pathway?bta04122+280946+507313	10	2	0.0493322	40.5415	0.00104214	0.112203	280946;507313	ENSBTAG00000030650;ENSBTAG00000030648
4	bta05412	Arrhythmogenic right ventricular cardiomyopathy (ARVC)	http://www.kegg.jp/kegg-bin/show_pathway?bta05412+282644+286800+537784	68	3	0.335459	8.94297	0.00447208	0.293679	282644;286800;537784	ENSBTAG00000009080;ENSBTAG00000010865;ENSBTAG00000002651
5	bta00514	Other types of O-glycan biosynthesis	http://www.kegg.jp/kegg-bin/show_pathway?bta00514+505267+511862	21	2	0.103598	19.3055	0.00469915	0.293679	505267;511862	ENSBTAG00000008562;ENSBTAG00000015043
6	bta05418	Fluid shear stress and atherosclerosis	http://www.kegg.jp/kegg-bin/show_pathway?bta05418+281557+282872+327671+513221	145	4	0.715317	5.59193	0.00545533	0.293679	281557;282872;327671;513221	ENSBTAG00000015582;ENSBTAG00000000014;ENSBTAG00000011043;ENSBTAG00000019267
7	bta04670	Leukocyte transendothelial migration	http://www.kegg.jp/kegg-bin/show_pathway?bta04670+282872+327671+507859	113	3	0.557454	5.38161	0.0179347	0.827559	282872;327671;507859	ENSBTAG00000007531;ENSBTAG00000011043;ENSBTAG00000019267
8	bta00270	Cysteine and methionine metabolism	http://www.kegg.jp/kegg-bin/show_pathway?bta00270+280946+507313	47	2	0.231861	8.62584	0.0223142	0.900936	280946;507313	ENSBTAG00000030650;ENSBTAG00000030648
9	bta05416	Viral myocarditis	http://www.kegg.jp/kegg-bin/show_pathway?bta05416+327671+407131	73	2	0.360125	5.55363	0.0500762	1	327671;407131	ENSBTAG00000018059;ENSBTAG00000011043
10	bta00983	Drug metabolism	http://www.kegg.jp/kegg-bin/show_pathway?bta00983+508916+512098	76	2	0.374925	5.3344	0.0538098	1	508916;512098	ENSBTAG00000011021;ENSBTAG00000001851
11	bta05410	Hypertrophic cardiomyopathy (HCM)	http://www.kegg.jp/kegg-bin/show_pathway?bta05410+282644+286800	80	2	0.394658	5.06768	0.0589372	1	282644;286800	ENSBTAG00000009080;ENSBTAG00000010865
12	bta00533	Glycosaminoglycan biosynthesis	http://www.kegg.jp/kegg-bin/show_pathway?bta00533+511328	14	1	0.0690651	14.4791	0.0669443	1	511328	ENSBTAG00000001390
13	bta05414	Dilated cardiomyopathy (DCM)	http://www.kegg.jp/kegg-bin/show_pathway?bta05414+282644+286800	88	2	0.434123	4.60698	0.0696736	1	282644;286800	ENSBTAG00000009080;ENSBTAG00000010865
14	bta00601	Glycosphingolipid biosynthesis	http://www.kegg.jp/kegg-bin/show_pathway?bta00601+511328	29	1	0.143063	6.98991	0.133818	1	511328	ENSBTAG00000001390
15	bta04926	Relaxin signaling pathway	http://www.kegg.jp/kegg-bin/show_pathway?bta04926+281792+282872	132	2	0.651185	3.07132	0.137755	1	281792;282872	ENSBTAG00000019267;ENSBTAG00000003794
16	bta04915	Estrogen signaling pathway	http://www.kegg.jp/kegg-bin/show_pathway?bta04915+281792+282872	137	2	0.675851	2.95923	0.146222	1	281792;282872	ENSBTAG00000019267;ENSBTAG00000003794
17	bta00190	Oxidative phosphorylation	http://www.kegg.jp/kegg-bin/show_pathway?bta00190+100295800+327706	140	2	0.690651	2.89582	0.151355	1	100295800;327706	ENSBTAG00000002182;ENSBTAG00000015892
18	bta03030	DNA replication	http://www.kegg.jp/kegg-bin/show_pathway?bta03030+506970	36	1	0.177596	5.63076	0.163403	1	506970	ENSBTAG00000015595
19	bta04921	Oxytocin signaling pathway	http://www.kegg.jp/kegg-bin/show_pathway?bta04921+281792+286800	151	2	0.744916	2.68487	0.170473	1	281792;286800	ENSBTAG00000010865;ENSBTAG00000003794
20	bta04723	Retrograde endocannabinoid signaling	http://www.kegg.jp/kegg-bin/show_pathway?bta04723+281792+327706	152	2	0.74985	2.6672	0.172232	1	281792;327706	ENSBTAG00000015892;ENSBTAG00000003794
21	bta00350	Tyrosine metabolism	http://www.kegg.jp/kegg-bin/show_pathway?bta00350+507496	39	1	0.192396	5.19762	0.175778	1	507496	ENSBTAG00000015895
22	bta00860	Porphyrin and chlorophyll metabolism	http://www.kegg.jp/kegg-bin/show_pathway?bta00860+513221	40	1	0.197329	5.06768	0.179863	1	513221	ENSBTAG00000015582
23	bta05219	Bladder cancer	http://www.kegg.jp/kegg-bin/show_pathway?bta05219+282872	43	1	0.212129	4.71412	0.192001	1	282872	ENSBTAG00000019267
24	bta03013	RNA transport	http://www.kegg.jp/kegg-bin/show_pathway?bta03013+510004+515226	164	2	0.809048	2.47204	0.19357	1	510004;515226	ENSBTAG00000001988;ENSBTAG00000006611
25	bta00970	Aminoacyl-tRNA biosynthesis	http://www.kegg.jp/kegg-bin/show_pathway?bta00970+536956	44	1	0.217062	4.60698	0.196007	1	536956	ENSBTAG00000011399
26	bta04216	Ferroptosis	http://www.kegg.jp/kegg-bin/show_pathway?bta04216+513221	45	1	0.221995	4.50461	0.199995	1	513221	ENSBTAG00000015582
27	bta04145	Phagosome	http://www.kegg.jp/kegg-bin/show_pathway?bta04145+317777+507859	170	2	0.838648	2.38479	0.204374	1	317777;507859	ENSBTAG00000032515;ENSBTAG00000007531
28	bta05332	Graft-versus-host disease	http://www.kegg.jp/kegg-bin/show_pathway?bta05332+407131	47	1	0.231861	4.31292	0.207912	1	407131	ENSBTAG00000018059
29	bta04330	Notch signaling pathway	http://www.kegg.jp/kegg-bin/show_pathway?bta04330+505267	48	1	0.236795	4.22307	0.211842	1	505267	ENSBTAG00000015043
30	bta04621	NOD-like receptor signaling pathway	http://www.kegg.jp/kegg-bin/show_pathway?bta04621+281557+540892	176	2	0.868247	2.30349	0.215249	1	281557;540892	ENSBTAG00000000014;ENSBTAG00000011395
31	bta00510	N-Glycan biosynthesis	http://www.kegg.jp/kegg-bin/show_pathway?bta00510+539837	50	1	0.246661	4.05415	0.219644	1	539837	ENSBTAG00000030632
32	bta00565	Ether lipid metabolism	http://www.kegg.jp/kegg-bin/show_pathway?bta00565+514646	52	1	0.256527	3.89822	0.227371	1	514646	ENSBTAG00000019272
33	bta04672	Intestinal immune network for IgA production	http://www.kegg.jp/kegg-bin/show_pathway?bta04672+407131	55	1	0.271327	3.68559	0.238822	1	407131	ENSBTAG00000018059
34	bta05330	Allograft rejection	http://www.kegg.jp/kegg-bin/show_pathway?bta05330+407131	55	1	0.271327	3.68559	0.238822	1	407131	ENSBTAG00000018059
35	bta04370	VEGF signaling pathway	http://www.kegg.jp/kegg-bin/show_pathway?bta04370+327671	58	1	0.286127	3.49495	0.250108	1	327671	ENSBTAG00000011043
36	bta04940	Type I diabetes mellitus	http://www.kegg.jp/kegg-bin/show_pathway?bta04940+407131	58	1	0.286127	3.49495	0.250108	1	407131	ENSBTAG00000018059
37	bta04510	Focal adhesion	http://www.kegg.jp/kegg-bin/show_pathway?bta04510+282644+327671	198	2	0.976778	2.04755	0.255533	1	282644;327671	ENSBTAG00000009080;ENSBTAG00000011043
38	bta04730	Long-term depression	http://www.kegg.jp/kegg-bin/show_pathway?bta04730+281792	60	1	0.295993	3.37846	0.25754	1	281792	ENSBTAG00000003794
39	bta04015	Rap1 signaling pathway	http://www.kegg.jp/kegg-bin/show_pathway?bta04015+281792+327671	210	2	1.03598	1.93055	0.277633	1	281792;327671	ENSBTAG00000011043;ENSBTAG00000003794
40	bta04810	Regulation of actin cytoskeleton	http://www.kegg.jp/kegg-bin/show_pathway?bta04810+282644+327671	210	2	1.03598	1.93055	0.277633	1	282644;327671	ENSBTAG00000009080;ENSBTAG00000011043
41	bta04520	Adherens junction	http://www.kegg.jp/kegg-bin/show_pathway?bta04520+327671	69	1	0.340392	2.93779	0.290108	1	327671	ENSBTAG00000011043
42	bta04664	Fc epsilon RI signaling pathway	http://www.kegg.jp/kegg-bin/show_pathway?bta04664+327671	70	1	0.345325	2.89582	0.293639	1	327671	ENSBTAG00000011043
43	bta05320	Autoimmune thyroid disease	http://www.kegg.jp/kegg-bin/show_pathway?bta05320+407131	70	1	0.345325	2.89582	0.293639	1	407131	ENSBTAG00000018059
44	bta04662	B cell receptor signaling pathway	http://www.kegg.jp/kegg-bin/show_pathway?bta04662+327671	74	1	0.365058	2.73929	0.307594	1	327671	ENSBTAG00000011043
45	bta05212	Pancreatic cancer	http://www.kegg.jp/kegg-bin/show_pathway?bta05212+327671	74	1	0.365058	2.73929	0.307594	1	327671	ENSBTAG00000011043
46	bta05140	Leishmaniasis	http://www.kegg.jp/kegg-bin/show_pathway?bta05140+507859	76	1	0.374925	2.6672	0.31447	1	507859	ENSBTAG00000007531
47	bta05170	Human immunodeficiency virus 1 infection	http://www.kegg.jp/kegg-bin/show_pathway?bta05170+281792+327671	233	2	1.14944	1.73998	0.319895	1	281792;327671	ENSBTAG00000011043;ENSBTAG00000003794
48	bta04714	Thermogenesis	http://www.kegg.jp/kegg-bin/show_pathway?bta04714+100295800+327706	237	2	1.16917	1.71061	0.327205	1	100295800;327706	ENSBTAG00000002182;ENSBTAG00000015892
49	bta04260	Cardiac muscle contraction	http://www.kegg.jp/kegg-bin/show_pathway?bta04260+286800	80	1	0.394658	2.53384	0.328023	1	286800	ENSBTAG00000010865
50	bta04014	Ras signaling pathway	http://www.kegg.jp/kegg-bin/show_pathway?bta04014+327671+518844	241	2	1.18891	1.68222	0.334496	1	327671;518844	ENSBTAG00000011043;ENSBTAG00000001168
51	bta04512	ECM-receptor interaction	http://www.kegg.jp/kegg-bin/show_pathway?bta04512+282644	83	1	0.409457	2.44226	0.338016	1	282644	ENSBTAG00000009080
52	bta05163	Human cytomegalovirus infection	http://www.kegg.jp/kegg-bin/show_pathway?bta05163+281792+327671	245	2	1.20864	1.65475	0.341767	1	281792;327671	ENSBTAG00000011043;ENSBTAG00000003794
53	bta04666	Fc gamma R-mediated phagocytosis	http://www.kegg.jp/kegg-bin/show_pathway?bta04666+327671	87	1	0.42919	2.32997	0.351115	1	327671	ENSBTAG00000011043
54	bta04727	GABAergic synapse	http://www.kegg.jp/kegg-bin/show_pathway?bta04727+281792	87	1	0.42919	2.32997	0.351115	1	281792	ENSBTAG00000003794
55	bta05210	Colorectal cancer	http://www.kegg.jp/kegg-bin/show_pathway?bta05210+327671	89	1	0.439057	2.27761	0.357569	1	327671	ENSBTAG00000011043
56	bta05032	Morphine addiction	http://www.kegg.jp/kegg-bin/show_pathway?bta05032+281792	92	1	0.453856	2.20334	0.367133	1	281792	ENSBTAG00000003794
57	bta04912	GnRH signaling pathway	http://www.kegg.jp/kegg-bin/show_pathway?bta04912+282872	93	1	0.45879	2.17965	0.37029	1	282872	ENSBTAG00000019267
58	bta01522	Endocrine resistance	http://www.kegg.jp/kegg-bin/show_pathway?bta01522+282872	94	1	0.463723	2.15646	0.373432	1	282872	ENSBTAG00000019267
59	bta03015	mRNA surveillance pathway	http://www.kegg.jp/kegg-bin/show_pathway?bta03015+518859	95	1	0.468656	2.13376	0.376558	1	518859	ENSBTAG00000010207
60	bta04064	NF-kappa B signaling pathway	http://www.kegg.jp/kegg-bin/show_pathway?bta04064+535188	96	1	0.473589	2.11153	0.379669	1	535188	ENSBTAG00000015044
61	bta04066	HIF-1 signaling pathway	http://www.kegg.jp/kegg-bin/show_pathway?bta04066+513221	98	1	0.483456	2.06844	0.385846	1	513221	ENSBTAG00000015582
62	bta04713	Circadian entrainment	http://www.kegg.jp/kegg-bin/show_pathway?bta04713+281792	99	1	0.488389	2.04755	0.388912	1	281792	ENSBTAG00000003794
63	bta05231	Choline metabolism in cancer	http://www.kegg.jp/kegg-bin/show_pathway?bta05231+327671	100	1	0.493322	2.02707	0.391963	1	327671	ENSBTAG00000011043
64	bta05323	Rheumatoid arthritis	http://www.kegg.jp/kegg-bin/show_pathway?bta05323+407131	100	1	0.493322	2.02707	0.391963	1	407131	ENSBTAG00000018059
65	bta04916	Melanogenesis	http://www.kegg.jp/kegg-bin/show_pathway?bta04916+281792	102	1	0.503189	1.98733	0.39802	1	281792	ENSBTAG00000003794
66	bta04933	AGE-RAGE signaling pathway in diabetic complications	http://www.kegg.jp/kegg-bin/show_pathway?bta04933+282872	102	1	0.503189	1.98733	0.39802	1	282872	ENSBTAG00000019267
67	bta00564	Glycerophospholipid metabolism	http://www.kegg.jp/kegg-bin/show_pathway?bta00564+514646	103	1	0.508122	1.96803	0.401027	1	514646	ENSBTAG00000019272
68	bta04620	Toll-like receptor signaling pathway	http://www.kegg.jp/kegg-bin/show_pathway?bta04620+407131	110	1	0.542654	1.84279	0.421667	1	407131	ENSBTAG00000018059
69	bta04010	MAPK signaling pathway	http://www.kegg.jp/kegg-bin/show_pathway?bta04010+286800+327671	292	2	1.4405	1.38841	0.425097	1	286800;327671	ENSBTAG00000010865;ENSBTAG00000011043
70	bta04724	Glutamatergic synapse	http://www.kegg.jp/kegg-bin/show_pathway?bta04724+281792	113	1	0.557454	1.79387	0.430299	1	281792	ENSBTAG00000003794
71	bta05145	Toxoplasmosis	http://www.kegg.jp/kegg-bin/show_pathway?bta05145+281792	113	1	0.557454	1.79387	0.430299	1	281792	ENSBTAG00000003794
72	bta04725	Cholinergic synapse	http://www.kegg.jp/kegg-bin/show_pathway?bta04725+281792	114	1	0.562387	1.77813	0.433148	1	281792	ENSBTAG00000003794
73	bta05142	Chagas disease (American trypanosomiasis)	http://www.kegg.jp/kegg-bin/show_pathway?bta05142+281792	114	1	0.562387	1.77813	0.433148	1	281792	ENSBTAG00000003794
74	bta04668	TNF signaling pathway	http://www.kegg.jp/kegg-bin/show_pathway?bta04668+540892	115	1	0.56732	1.76267	0.435983	1	540892	ENSBTAG00000011395
75	bta04726	Serotonergic synapse	http://www.kegg.jp/kegg-bin/show_pathway?bta04726+281792	116	1	0.572254	1.74748	0.438805	1	281792	ENSBTAG00000003794
76	bta04080	Neuroactive ligand-receptor interaction	http://www.kegg.jp/kegg-bin/show_pathway?bta04080+518585+539186	302	2	1.48983	1.34243	0.44219	1	518585;539186	ENSBTAG00000001464;ENSBTAG00000008910
77	bta04071	Sphingolipid signaling pathway	http://www.kegg.jp/kegg-bin/show_pathway?bta04071+327671	119	1	0.587053	1.70342	0.447187	1	327671	ENSBTAG00000011043
78	bta04722	Neurotrophin signaling pathway	http://www.kegg.jp/kegg-bin/show_pathway?bta04722+614726	122	1	0.601853	1.66154	0.455446	1	614726	ENSBTAG00000009101
79	bta04110	Cell cycle	http://www.kegg.jp/kegg-bin/show_pathway?bta04110+506970	123	1	0.606786	1.64803	0.458173	1	506970	ENSBTAG00000015595
80	bta04650	Natural killer cell mediated cytotoxicity	http://www.kegg.jp/kegg-bin/show_pathway?bta04650+327671	131	1	0.646252	1.54738	0.47951	1	327671	ENSBTAG00000011043
81	bta04728	Dopaminergic synapse	http://www.kegg.jp/kegg-bin/show_pathway?bta04728+281792	132	1	0.651185	1.53566	0.482119	1	281792	ENSBTAG00000003794
82	bta04380	Osteoclast differentiation	http://www.kegg.jp/kegg-bin/show_pathway?bta04380+507859	133	1	0.656118	1.52412	0.484715	1	507859	ENSBTAG00000007531
83	bta04210	Apoptosis	http://www.kegg.jp/kegg-bin/show_pathway?bta04210+528530	142	1	0.700517	1.42752	0.507515	1	528530	ENSBTAG00000009064
84	bta04261	Adrenergic signaling in cardiomyocytes	http://www.kegg.jp/kegg-bin/show_pathway?bta04261+286800	143	1	0.705451	1.41753	0.509987	1	286800	ENSBTAG00000010865
85	bta04310	Wnt signaling pathway	http://www.kegg.jp/kegg-bin/show_pathway?bta04310+327671	147	1	0.725183	1.37896	0.519754	1	327671	ENSBTAG00000011043
86	bta05165	Human papillomavirus infection	http://www.kegg.jp/kegg-bin/show_pathway?bta05165+282644+505267	354	2	1.74636	1.14524	0.526506	1	282644;505267	ENSBTAG00000009080;ENSBTAG00000015043
87	bta04072	Phospholipase D signaling pathway	http://www.kegg.jp/kegg-bin/show_pathway?bta04072+517887	150	1	0.739983	1.35138	0.526954	1	517887	ENSBTAG00000014237
88	bta05012	Parkinson disease	http://www.kegg.jp/kegg-bin/show_pathway?bta05012+327706	150	1	0.739983	1.35138	0.526954	1	327706	ENSBTAG00000015892
89	bta04514	Cell adhesion molecules (CAMs)	http://www.kegg.jp/kegg-bin/show_pathway?bta04514+407131	156	1	0.769582	1.29941	0.541039	1	407131	ENSBTAG00000018059
90	bta04932	Non-alcoholic fatty liver disease (NAFLD)	http://www.kegg.jp/kegg-bin/show_pathway?bta04932+327706	158	1	0.779449	1.28296	0.545643	1	327706	ENSBTAG00000015892
91	bta04141	Protein processing in endoplasmic reticulum	http://www.kegg.jp/kegg-bin/show_pathway?bta04141+507541	165	1	0.813981	1.22853	0.561403	1	507541	ENSBTAG00000003798
92	bta04360	Axon guidance	http://www.kegg.jp/kegg-bin/show_pathway?bta04360+327671	174	1	0.85838	1.16498	0.580885	1	327671	ENSBTAG00000011043
93	bta05225	Hepatocellular carcinoma	http://www.kegg.jp/kegg-bin/show_pathway?bta05225+513221	174	1	0.85838	1.16498	0.580885	1	513221	ENSBTAG00000015582
94	bta04217	Necroptosis	http://www.kegg.jp/kegg-bin/show_pathway?bta04217+540892	177	1	0.87318	1.14524	0.587189	1	540892	ENSBTAG00000011395
95	bta04530	Tight junction	http://www.kegg.jp/kegg-bin/show_pathway?bta04530+404108	178	1	0.878113	1.13881	0.58927	1	404108	ENSBTAG00000010402
96	bta05010	Alzheimer disease	http://www.kegg.jp/kegg-bin/show_pathway?bta05010+327706	180	1	0.88798	1.12615	0.593401	1	327706	ENSBTAG00000015892
97	bta05322	Systemic lupus erythematosus	http://www.kegg.jp/kegg-bin/show_pathway?bta05322+407131	181	1	0.892913	1.11993	0.595451	1	407131	ENSBTAG00000018059
98	bta04062	Chemokine signaling pathway	http://www.kegg.jp/kegg-bin/show_pathway?bta04062+327671	188	1	0.927446	1.07823	0.609523	1	327671	ENSBTAG00000011043
99	bta05152	Tuberculosis	http://www.kegg.jp/kegg-bin/show_pathway?bta05152+317777	197	1	0.971845	1.02897	0.626916	1	317777	ENSBTAG00000032515
100	bta05016	Huntington disease	http://www.kegg.jp/kegg-bin/show_pathway?bta05016+327706	198	1	0.976778	1.02377	0.628801	1	327706	ENSBTAG00000015892

## Sheet: Biological Process
	geneSet	description	link	size	overlap	expect	enrichmentRatio	pValue	FDR	overlapId	userId
1	GO:0010035	response to inorganic substance	http://amigo.geneontology.org/amigo/term/GO:0010035	198	8	1.38431	5.77906	6.48461e-05	0.030348	404070;510004;513221;537613;613320;613358;768319;782851	ENSBTAG00000015582;ENSBTAG00000000606;ENSBTAG00000038706;ENSBTAG00000001595;ENSBTAG00000023659;ENSBTAG00000016886;ENSBTAG00000015084;ENSBTAG00000006611
2	GO:0009636	response to toxic substance	http://amigo.geneontology.org/amigo/term/GO:0009636	176	7	1.2305	5.68876	0.000211819	0.0495657	404070;510004;513221;613320;613358;768319;782851	ENSBTAG00000015582;ENSBTAG00000038706;ENSBTAG00000001595;ENSBTAG00000023659;ENSBTAG00000016886;ENSBTAG00000015084;ENSBTAG00000006611
3	GO:0019725	cellular homeostasis	http://amigo.geneontology.org/amigo/term/GO:0019725	472	9	3.29997	2.7273	0.00521833	0.731228	281557;404070;513221;538603;613320;613358;614912;768319;782851	ENSBTAG00000015582;ENSBTAG00000000014;ENSBTAG00000019159;ENSBTAG00000030646;ENSBTAG00000038706;ENSBTAG00000001595;ENSBTAG00000023659;ENSBTAG00000016886;ENSBTAG00000015084
4	GO:0016042	lipid catabolic process	http://amigo.geneontology.org/amigo/term/GO:0016042	174	5	1.21651	4.11011	0.00721967	0.731228	497207;512098;513992;530461;613320	ENSBTAG00000000877;ENSBTAG00000011021;ENSBTAG00000016886;ENSBTAG00000011164;ENSBTAG00000001852
5	GO:0050801	ion homeostasis	http://amigo.geneontology.org/amigo/term/GO:0050801	419	8	2.92942	2.73092	0.00839384	0.731228	404070;513221;538603;613320;613358;614912;768319;782851	ENSBTAG00000015582;ENSBTAG00000019159;ENSBTAG00000030646;ENSBTAG00000038706;ENSBTAG00000001595;ENSBTAG00000023659;ENSBTAG00000016886;ENSBTAG00000015084
6	GO:0098657	import into cell	http://amigo.geneontology.org/amigo/term/GO:0098657	362	7	2.53091	2.76581	0.0127432	0.731228	282363;286800;317777;507859;532649;540892;100126272	ENSBTAG00000032515;ENSBTAG00000038195;ENSBTAG00000010865;ENSBTAG00000007531;ENSBTAG00000011395;ENSBTAG00000022069;ENSBTAG00000003353
7	GO:0006979	response to oxidative stress	http://amigo.geneontology.org/amigo/term/GO:0006979	201	5	1.40528	3.558	0.0129716	0.731228	317777;327706;510004;513221;613320	ENSBTAG00000015892;ENSBTAG00000032515;ENSBTAG00000015582;ENSBTAG00000016886;ENSBTAG00000006611
8	GO:0042493	response to drug	http://amigo.geneontology.org/amigo/term/GO:0042493	369	7	2.57985	2.71334	0.0140433	0.731228	280695;282363;493713;510004;513221;537613;613320	ENSBTAG00000019557;ENSBTAG00000015582;ENSBTAG00000005333;ENSBTAG00000000606;ENSBTAG00000003353;ENSBTAG00000016886;ENSBTAG00000006611
9	GO:0070265	necrotic cell death	http://amigo.geneontology.org/amigo/term/GO:0070265	27	2	0.188769	10.5949	0.0150907	0.731228	540892;613320	ENSBTAG00000011395;ENSBTAG00000016886
10	GO:0070085	glycosylation	http://amigo.geneontology.org/amigo/term/GO:0070085	138	4	0.964821	4.14585	0.0156245	0.731228	505267;511862;539837;613320	ENSBTAG00000008562;ENSBTAG00000015043;ENSBTAG00000030632;ENSBTAG00000016886
11	GO:0042157	lipoprotein metabolic process	http://amigo.geneontology.org/amigo/term/GO:0042157	87	3	0.608257	4.93213	0.0227746	0.968956	505078;510193;512905	ENSBTAG00000038652;ENSBTAG00000040244;ENSBTAG00000000667
12	GO:0071826	ribonucleoprotein complex subunit organization	http://amigo.geneontology.org/amigo/term/GO:0071826	166	4	1.16058	3.44655	0.0285439	1	514141;515226;518859;532649	ENSBTAG00000001988;ENSBTAG00000022069;ENSBTAG00000001171;ENSBTAG00000010207
13	GO:0051341	regulation of oxidoreductase activity	http://amigo.geneontology.org/amigo/term/GO:0051341	40	2	0.279658	7.15159	0.031648	1	530461;613320	ENSBTAG00000000877;ENSBTAG00000016886
14	GO:0015844	monoamine transport	http://amigo.geneontology.org/amigo/term/GO:0015844	41	2	0.28665	6.97716	0.0331236	1	282363;537613	ENSBTAG00000000606;ENSBTAG00000003353
15	GO:0031503	protein-containing complex localization	http://amigo.geneontology.org/amigo/term/GO:0031503	111	3	0.776051	3.86572	0.0423944	1	286800;510004;617147	ENSBTAG00000010865;ENSBTAG00000026657;ENSBTAG00000006611
16	GO:0010876	lipid localization	http://amigo.geneontology.org/amigo/term/GO:0010876	194	4	1.35634	2.94911	0.0463951	1	317777;505078;510193;512905	ENSBTAG00000032515;ENSBTAG00000038652;ENSBTAG00000040244;ENSBTAG00000000667
17	GO:0009100	glycoprotein metabolic process	http://amigo.geneontology.org/amigo/term/GO:0009100	206	4	1.44024	2.77732	0.0555921	1	505267;511862;539837;613320	ENSBTAG00000008562;ENSBTAG00000015043;ENSBTAG00000030632;ENSBTAG00000016886
18	GO:0072593	reactive oxygen species metabolic process	http://amigo.geneontology.org/amigo/term/GO:0072593	124	3	0.86694	3.46045	0.0556504	1	317777;507859;613320	ENSBTAG00000032515;ENSBTAG00000007531;ENSBTAG00000016886
19	GO:0015696	ammonium transport	http://amigo.geneontology.org/amigo/term/GO:0015696	55	2	0.38453	5.20115	0.0563858	1	282363;537613	ENSBTAG00000000606;ENSBTAG00000003353
20	GO:0061024	membrane organization	http://amigo.geneontology.org/amigo/term/GO:0061024	320	5	2.23727	2.23487	0.072332	1	286800;510004;514646;540892;613320	ENSBTAG00000010865;ENSBTAG00000011395;ENSBTAG00000019272;ENSBTAG00000016886;ENSBTAG00000006611
21	GO:0007264	small GTPase mediated signal transduction	http://amigo.geneontology.org/amigo/term/GO:0007264	238	4	1.66397	2.40389	0.0845673	1	327671;505510;518844;617147	ENSBTAG00000015898;ENSBTAG00000026657;ENSBTAG00000011043;ENSBTAG00000001168
22	GO:0072331	signal transduction by p53 class mediator	http://amigo.geneontology.org/amigo/term/GO:0072331	73	2	0.510376	3.91868	0.0922153	1	317777;507865	ENSBTAG00000032515;ENSBTAG00000008755
23	GO:0050808	synapse organization	http://amigo.geneontology.org/amigo/term/GO:0050808	154	3	1.07668	2.78633	0.0926997	1	282651;286800;507983	ENSBTAG00000004177;ENSBTAG00000010865;ENSBTAG00000013918
24	GO:0070661	leukocyte proliferation	http://amigo.geneontology.org/amigo/term/GO:0070661	155	3	1.08368	2.76836	0.0940774	1	327671;407131;507865	ENSBTAG00000018059;ENSBTAG00000008755;ENSBTAG00000011043
25	GO:0051259	protein complex oligomerization	http://amigo.geneontology.org/amigo/term/GO:0051259	263	4	1.83875	2.17539	0.111466	1	513221;518859;540892;614912	ENSBTAG00000015582;ENSBTAG00000030646;ENSBTAG00000011395;ENSBTAG00000010207
26	GO:0043954	cellular component maintenance	http://amigo.geneontology.org/amigo/term/GO:0043954	20	1	0.139829	7.15159	0.131049	1	507983	ENSBTAG00000004177
27	GO:0007031	peroxisome organization	http://amigo.geneontology.org/amigo/term/GO:0007031	21	1	0.146821	6.81104	0.137138	1	540892	ENSBTAG00000011395
28	GO:0022613	ribonucleoprotein complex biogenesis	http://amigo.geneontology.org/amigo/term/GO:0022613	289	4	2.02053	1.97968	0.143001	1	514141;515226;518859;532649	ENSBTAG00000001988;ENSBTAG00000022069;ENSBTAG00000001171;ENSBTAG00000010207
29	GO:0044419	interspecies interaction between organisms	http://amigo.geneontology.org/amigo/term/GO:0044419	190	3	1.32838	2.2584	0.147207	1	282644;513221;515226	ENSBTAG00000009080;ENSBTAG00000015582;ENSBTAG00000001988
30	GO:0017144	drug metabolic process	http://amigo.geneontology.org/amigo/term/GO:0017144	402	5	2.81056	1.779	0.148978	1	493713;507313;514646;540892;613320	ENSBTAG00000019557;ENSBTAG00000030648;ENSBTAG00000011395;ENSBTAG00000019272;ENSBTAG00000016886
31	GO:0007212	dopamine receptor signaling pathway	http://amigo.geneontology.org/amigo/term/GO:0007212	23	1	0.160803	6.21877	0.14919	1	281792	ENSBTAG00000003794
32	GO:0043112	receptor metabolic process	http://amigo.geneontology.org/amigo/term/GO:0043112	98	2	0.685163	2.91902	0.149665	1	286800;532649	ENSBTAG00000010865;ENSBTAG00000022069
33	GO:0006403	RNA localization	http://amigo.geneontology.org/amigo/term/GO:0006403	99	2	0.692154	2.88953	0.152095	1	280946;510004	ENSBTAG00000030650;ENSBTAG00000006611
34	GO:0099072	regulation of postsynaptic membrane neurotransmitter receptor levels	http://amigo.geneontology.org/amigo/term/GO:0099072	24	1	0.167795	5.95966	0.155153	1	286800	ENSBTAG00000010865
35	GO:0030855	epithelial cell differentiation	http://amigo.geneontology.org/amigo/term/GO:0030855	299	4	2.09045	1.91347	0.155996	1	280946;282113;510004;539837	ENSBTAG00000009014;ENSBTAG00000030650;ENSBTAG00000030632;ENSBTAG00000006611
36	GO:0009894	regulation of catabolic process	http://amigo.geneontology.org/amigo/term/GO:0009894	409	5	2.85951	1.74855	0.156739	1	507865;513221;530461;540892;613320	ENSBTAG00000008755;ENSBTAG00000015582;ENSBTAG00000011395;ENSBTAG00000000877;ENSBTAG00000016886
37	GO:0007219	Notch signaling pathway	http://amigo.geneontology.org/amigo/term/GO:0007219	101	2	0.706137	2.83231	0.15698	1	505267;511862	ENSBTAG00000008562;ENSBTAG00000015043
38	GO:0099536	synaptic signaling	http://amigo.geneontology.org/amigo/term/GO:0099536	307	4	2.14638	1.86361	0.166707	1	282363;286800;527921;537613	ENSBTAG00000017116;ENSBTAG00000010865;ENSBTAG00000000606;ENSBTAG00000003353
39	GO:0106027	neuron projection organization	http://amigo.geneontology.org/amigo/term/GO:0106027	26	1	0.181778	5.50122	0.166958	1	507983	ENSBTAG00000004177
40	GO:1901571	fatty acid derivative transport	http://amigo.geneontology.org/amigo/term/GO:1901571	26	1	0.181778	5.50122	0.166958	1	317777	ENSBTAG00000032515
41	GO:0008284	positive regulation of cell proliferation	http://amigo.geneontology.org/amigo/term/GO:0008284	418	5	2.92243	1.71091	0.166963	1	327671;407131;507865;513221;538649	ENSBTAG00000018059;ENSBTAG00000008755;ENSBTAG00000015582;ENSBTAG00000011043;ENSBTAG00000001161
42	GO:0061919	process utilizing autophagic mechanism	http://amigo.geneontology.org/amigo/term/GO:0061919	203	3	1.41927	2.11377	0.169022	1	513221;540892;613320	ENSBTAG00000015582;ENSBTAG00000011395;ENSBTAG00000016886
43	GO:0033013	tetrapyrrole metabolic process	http://amigo.geneontology.org/amigo/term/GO:0033013	28	1	0.195761	5.10828	0.178599	1	513221	ENSBTAG00000015582
44	GO:0140253	cell-cell fusion	http://amigo.geneontology.org/amigo/term/GO:0140253	28	1	0.195761	5.10828	0.178599	1	507983	ENSBTAG00000004177
45	GO:0006949	syncytium formation	http://amigo.geneontology.org/amigo/term/GO:0006949	29	1	0.202752	4.93213	0.18436	1	507983	ENSBTAG00000004177
46	GO:0034394	protein localization to cell surface	http://amigo.geneontology.org/amigo/term/GO:0034394	29	1	0.202752	4.93213	0.18436	1	282113	ENSBTAG00000009014
47	GO:0043631	RNA polyadenylation	http://amigo.geneontology.org/amigo/term/GO:0043631	29	1	0.202752	4.93213	0.18436	1	518859	ENSBTAG00000010207
48	GO:0007215	glutamate receptor signaling pathway	http://amigo.geneontology.org/amigo/term/GO:0007215	30	1	0.209744	4.76772	0.190081	1	286800	ENSBTAG00000010865
49	GO:0042490	mechanoreceptor differentiation	http://amigo.geneontology.org/amigo/term/GO:0042490	30	1	0.209744	4.76772	0.190081	1	539837	ENSBTAG00000030632
50	GO:0043620	regulation of DNA-templated transcription in response to stress	http://amigo.geneontology.org/amigo/term/GO:0043620	30	1	0.209744	4.76772	0.190081	1	613320	ENSBTAG00000016886
51	GO:0000959	mitochondrial RNA metabolic process	http://amigo.geneontology.org/amigo/term/GO:0000959	31	1	0.216735	4.61393	0.195762	1	536956	ENSBTAG00000011399
52	GO:0019748	secondary metabolic process	http://amigo.geneontology.org/amigo/term/GO:0019748	31	1	0.216735	4.61393	0.195762	1	507313	ENSBTAG00000030648
53	GO:0033627	cell adhesion mediated by integrin	http://amigo.geneontology.org/amigo/term/GO:0033627	31	1	0.216735	4.61393	0.195762	1	282644	ENSBTAG00000009080
54	GO:0098609	cell-cell adhesion	http://amigo.geneontology.org/amigo/term/GO:0098609	330	4	2.30718	1.73372	0.1989	1	282651;327671;407131;507865	ENSBTAG00000018059;ENSBTAG00000008755;ENSBTAG00000011043;ENSBTAG00000013918
55	GO:0015931	nucleobase-containing compound transport	http://amigo.geneontology.org/amigo/term/GO:0015931	119	2	0.831983	2.40389	0.202102	1	280946;510004	ENSBTAG00000030650;ENSBTAG00000006611
56	GO:0015850	organic hydroxy compound transport	http://amigo.geneontology.org/amigo/term/GO:0015850	120	2	0.838975	2.38386	0.204657	1	282363;537613	ENSBTAG00000000606;ENSBTAG00000003353
57	GO:0060627	regulation of vesicle-mediated transport	http://amigo.geneontology.org/amigo/term/GO:0060627	225	3	1.57308	1.90709	0.207885	1	327671;532649;537613	ENSBTAG00000011043;ENSBTAG00000000606;ENSBTAG00000022069
58	GO:0007187	G protein-coupled receptor signaling pathway, coupled to cyclic nucleotide second messenger	http://amigo.geneontology.org/amigo/term/GO:0007187	124	2	0.86694	2.30696	0.214911	1	281792;282651	ENSBTAG00000013918;ENSBTAG00000003794
59	GO:0010608	posttranscriptional regulation of gene expression	http://amigo.geneontology.org/amigo/term/GO:0010608	230	3	1.60803	1.86563	0.216997	1	514141;515226;518859	ENSBTAG00000001988;ENSBTAG00000001171;ENSBTAG00000010207
60	GO:0090559	regulation of membrane permeability	http://amigo.geneontology.org/amigo/term/GO:0090559	35	1	0.244701	4.08662	0.218098	1	613320	ENSBTAG00000016886
61	GO:0097581	lamellipodium organization	http://amigo.geneontology.org/amigo/term/GO:0097581	35	1	0.244701	4.08662	0.218098	1	327671	ENSBTAG00000011043
62	GO:0006836	neurotransmitter transport	http://amigo.geneontology.org/amigo/term/GO:0006836	126	2	0.880923	2.27035	0.220058	1	282363;537613	ENSBTAG00000000606;ENSBTAG00000003353
63	GO:0002520	immune system development	http://amigo.geneontology.org/amigo/term/GO:0002520	463	5	3.23704	1.54462	0.221781	1	280695;505267;507865;518859;614726	ENSBTAG00000008755;ENSBTAG00000005333;ENSBTAG00000015043;ENSBTAG00000009101;ENSBTAG00000010207
64	GO:0051046	regulation of secretion	http://amigo.geneontology.org/amigo/term/GO:0051046	349	4	2.44002	1.63933	0.226842	1	317777;327671;537613;540892	ENSBTAG00000032515;ENSBTAG00000011043;ENSBTAG00000000606;ENSBTAG00000011395
65	GO:0017038	protein import	http://amigo.geneontology.org/amigo/term/GO:0017038	129	2	0.901898	2.21755	0.227798	1	510004;613320	ENSBTAG00000016886;ENSBTAG00000006611
66	GO:0015837	amine transport	http://amigo.geneontology.org/amigo/term/GO:0015837	38	1	0.265675	3.76399	0.234449	1	537613	ENSBTAG00000000606
67	GO:0048872	homeostasis of number of cells	http://amigo.geneontology.org/amigo/term/GO:0048872	133	2	0.929864	2.15085	0.23815	1	280695;513221	ENSBTAG00000015582;ENSBTAG00000005333
68	GO:0009628	response to abiotic stimulus	http://amigo.geneontology.org/amigo/term/GO:0009628	478	5	3.34192	1.49615	0.24122	1	280695;282872;507983;513221;613320	ENSBTAG00000004177;ENSBTAG00000015582;ENSBTAG00000005333;ENSBTAG00000019267;ENSBTAG00000016886
69	GO:0031344	regulation of cell projection organization	http://amigo.geneontology.org/amigo/term/GO:0031344	249	3	1.74087	1.72327	0.252339	1	327671;613320;614912	ENSBTAG00000030646;ENSBTAG00000011043;ENSBTAG00000016886
70	GO:0010257	NADH dehydrogenase complex assembly	http://amigo.geneontology.org/amigo/term/GO:0010257	42	1	0.293641	3.40552	0.255727	1	327706	ENSBTAG00000015892
71	GO:0032963	collagen metabolic process	http://amigo.geneontology.org/amigo/term/GO:0032963	43	1	0.300633	3.32632	0.260955	1	282872	ENSBTAG00000019267
72	GO:1901137	carbohydrate derivative biosynthetic process	http://amigo.geneontology.org/amigo/term/GO:1901137	373	4	2.60781	1.53385	0.263499	1	505267;511862;539837;613320	ENSBTAG00000008562;ENSBTAG00000015043;ENSBTAG00000030632;ENSBTAG00000016886
73	GO:0031589	cell-substrate adhesion	http://amigo.geneontology.org/amigo/term/GO:0031589	144	2	1.00677	1.98655	0.26673	1	282644;327671	ENSBTAG00000009080;ENSBTAG00000011043
74	GO:0090130	tissue migration	http://amigo.geneontology.org/amigo/term/GO:0090130	144	2	1.00677	1.98655	0.26673	1	510004;513221	ENSBTAG00000015582;ENSBTAG00000006611
75	GO:0042440	pigment metabolic process	http://amigo.geneontology.org/amigo/term/GO:0042440	45	1	0.314615	3.17848	0.271302	1	513221	ENSBTAG00000015582
76	GO:0031647	regulation of protein stability	http://amigo.geneontology.org/amigo/term/GO:0031647	146	2	1.02075	1.95934	0.271934	1	507865;613320	ENSBTAG00000008755;ENSBTAG00000016886
77	GO:0007229	integrin-mediated signaling pathway	http://amigo.geneontology.org/amigo/term/GO:0007229	46	1	0.321607	3.10939	0.276423	1	282644	ENSBTAG00000009080
78	GO:0018208	peptidyl-proline modification	http://amigo.geneontology.org/amigo/term/GO:0018208	46	1	0.321607	3.10939	0.276423	1	514141	ENSBTAG00000001171
79	GO:0046717	acid secretion	http://amigo.geneontology.org/amigo/term/GO:0046717	47	1	0.328598	3.04323	0.281507	1	317777	ENSBTAG00000032515
80	GO:0062012	regulation of small molecule metabolic process	http://amigo.geneontology.org/amigo/term/GO:0062012	152	2	1.0627	1.882	0.28754	1	530461;540892	ENSBTAG00000011395;ENSBTAG00000000877
81	GO:0001505	regulation of neurotransmitter levels	http://amigo.geneontology.org/amigo/term/GO:0001505	153	2	1.06969	1.8697	0.290138	1	282363;537613	ENSBTAG00000000606;ENSBTAG00000003353
82	GO:0071166	ribonucleoprotein complex localization	http://amigo.geneontology.org/amigo/term/GO:0071166	49	1	0.342581	2.91902	0.291572	1	510004	ENSBTAG00000006611
83	GO:0001655	urogenital system development	http://amigo.geneontology.org/amigo/term/GO:0001655	155	2	1.08368	1.84557	0.295333	1	510004;617147	ENSBTAG00000026657;ENSBTAG00000006611
84	GO:0061053	somite development	http://amigo.geneontology.org/amigo/term/GO:0061053	50	1	0.349573	2.86063	0.296552	1	511862	ENSBTAG00000008562
85	GO:0033365	protein localization to organelle	http://amigo.geneontology.org/amigo/term/GO:0033365	397	4	2.77561	1.44113	0.30125	1	286800;510004;540892;613320	ENSBTAG00000010865;ENSBTAG00000011395;ENSBTAG00000016886;ENSBTAG00000006611
86	GO:0043269	regulation of ion transport	http://amigo.geneontology.org/amigo/term/GO:0043269	275	3	1.92265	1.56035	0.301944	1	286800;317777;537613	ENSBTAG00000032515;ENSBTAG00000010865;ENSBTAG00000000606
87	GO:0010942	positive regulation of cell death	http://amigo.geneontology.org/amigo/term/GO:0010942	287	3	2.00655	1.49511	0.325076	1	513221;540892;613320	ENSBTAG00000015582;ENSBTAG00000011395;ENSBTAG00000016886
88	GO:0051668	localization within membrane	http://amigo.geneontology.org/amigo/term/GO:0051668	56	1	0.391521	2.55414	0.325717	1	286800	ENSBTAG00000010865
89	GO:0044782	cilium organization	http://amigo.geneontology.org/amigo/term/GO:0044782	167	2	1.16757	1.71296	0.326376	1	614912;617147	ENSBTAG00000026657;ENSBTAG00000030646
90	GO:0051169	nuclear transport	http://amigo.geneontology.org/amigo/term/GO:0051169	173	2	1.20952	1.65355	0.341781	1	510004;613320	ENSBTAG00000016886;ENSBTAG00000006611
91	GO:0051098	regulation of binding	http://amigo.geneontology.org/amigo/term/GO:0051098	176	2	1.2305	1.62536	0.349446	1	505267;515226	ENSBTAG00000001988;ENSBTAG00000015043
92	GO:0051640	organelle localization	http://amigo.geneontology.org/amigo/term/GO:0051640	300	3	2.09744	1.43032	0.350162	1	327671;537613;540892	ENSBTAG00000011043;ENSBTAG00000000606;ENSBTAG00000011395
93	GO:0030155	regulation of cell adhesion	http://amigo.geneontology.org/amigo/term/GO:0030155	302	3	2.11142	1.42085	0.354017	1	327671;407131;507865	ENSBTAG00000018059;ENSBTAG00000008755;ENSBTAG00000011043
94	GO:0009991	response to extracellular stimulus	http://amigo.geneontology.org/amigo/term/GO:0009991	178	2	1.24448	1.6071	0.35454	1	534482;613320	ENSBTAG00000022155;ENSBTAG00000016886
95	GO:0007498	mesoderm development	http://amigo.geneontology.org/amigo/term/GO:0007498	63	1	0.440462	2.27035	0.358241	1	511862	ENSBTAG00000008562
96	GO:0031123	RNA 3'-end processing	http://amigo.geneontology.org/amigo/term/GO:0031123	63	1	0.440462	2.27035	0.358241	1	518859	ENSBTAG00000010207
97	GO:0001775	cell activation	http://amigo.geneontology.org/amigo/term/GO:0001775	434	4	3.03429	1.31826	0.360585	1	327671;407131;505267;507865	ENSBTAG00000018059;ENSBTAG00000008755;ENSBTAG00000011043;ENSBTAG00000015043
98	GO:0008285	negative regulation of cell proliferation	http://amigo.geneontology.org/amigo/term/GO:0008285	306	3	2.13939	1.40227	0.361722	1	407131;507865;513221	ENSBTAG00000018059;ENSBTAG00000008755;ENSBTAG00000015582
99	GO:0007224	smoothened signaling pathway	http://amigo.geneontology.org/amigo/term/GO:0007224	64	1	0.447453	2.23487	0.362759	1	617147	ENSBTAG00000026657
100	GO:0035637	multicellular organismal signaling	http://amigo.geneontology.org/amigo/term/GO:0035637	64	1	0.447453	2.23487	0.362759	1	286800	ENSBTAG00000010865

## Sheet: Molecular Function
	geneSet	description	link	size	overlap	expect	enrichmentRatio	pValue	FDR	overlapId	userId
1	GO:0003924	GTPase activity	http://amigo.geneontology.org/amigo/term/GO:0003924	220	6	1.54774	3.87662	0.00426732	0.645403	281792;327671;505510;527921;540892;617147	ENSBTAG00000015898;ENSBTAG00000017116;ENSBTAG00000026657;ENSBTAG00000011043;ENSBTAG00000011395;ENSBTAG00000003794
2	GO:0001882	nucleoside binding	http://amigo.geneontology.org/amigo/term/GO:0001882	276	6	1.94171	3.09006	0.0124897	0.645403	281792;327671;505510;527921;540892;617147	ENSBTAG00000015898;ENSBTAG00000017116;ENSBTAG00000026657;ENSBTAG00000011043;ENSBTAG00000011395;ENSBTAG00000003794
3	GO:0019001	guanyl nucleotide binding	http://amigo.geneontology.org/amigo/term/GO:0019001	281	6	1.97688	3.03508	0.0135555	0.645403	281792;327671;505510;527921;540892;617147	ENSBTAG00000015898;ENSBTAG00000017116;ENSBTAG00000026657;ENSBTAG00000011043;ENSBTAG00000011395;ENSBTAG00000003794
4	GO:0030246	carbohydrate binding	http://amigo.geneontology.org/amigo/term/GO:0030246	137	4	0.963819	4.15016	0.0154588	0.645403	282651;317777;514141;100126272	ENSBTAG00000032515;ENSBTAG00000038195;ENSBTAG00000013918;ENSBTAG00000001171
5	GO:0030276	clathrin binding	http://amigo.geneontology.org/amigo/term/GO:0030276	31	2	0.21809	9.17051	0.0198387	0.662613	504912;537613	ENSBTAG00000045785;ENSBTAG00000000606
6	GO:0016757	transferase activity, transferring glycosyl groups	http://amigo.geneontology.org/amigo/term/GO:0016757	162	4	1.1397	3.5097	0.0267657	0.744979	505267;511328;511862;539837	ENSBTAG00000001390;ENSBTAG00000008562;ENSBTAG00000015043;ENSBTAG00000030632
7	GO:0008289	lipid binding	http://amigo.geneontology.org/amigo/term/GO:0008289	380	6	2.67337	2.24436	0.0495341	1	505078;507859;510193;512905;537613;540892	ENSBTAG00000038652;ENSBTAG00000040244;ENSBTAG00000000667;ENSBTAG00000007531;ENSBTAG00000000606;ENSBTAG00000011395
8	GO:0016782	transferase activity, transferring sulfur-containing groups	http://amigo.geneontology.org/amigo/term/GO:0016782	51	2	0.358794	5.57423	0.0497658	1	280946;507313	ENSBTAG00000030650;ENSBTAG00000030648
9	GO:0008270	zinc ion binding	http://amigo.geneontology.org/amigo/term/GO:0008270	415	6	2.9196	2.05508	0.0700051	1	282872;404070;493713;507865;518844;613320	ENSBTAG00000019557;ENSBTAG00000008755;ENSBTAG00000001168;ENSBTAG00000019267;ENSBTAG00000023659;ENSBTAG00000016886
10	GO:0005509	calcium ion binding	http://amigo.geneontology.org/amigo/term/GO:0005509	359	5	2.52563	1.97971	0.106882	1	282651;514646;534482;537613;538603	ENSBTAG00000022155;ENSBTAG00000019159;ENSBTAG00000000606;ENSBTAG00000013918;ENSBTAG00000019272
11	GO:0046906	tetrapyrrole binding	http://amigo.geneontology.org/amigo/term/GO:0046906	93	2	0.654271	3.05684	0.138944	1	280695;513221	ENSBTAG00000015582;ENSBTAG00000005333
12	GO:0030551	cyclic nucleotide binding	http://amigo.geneontology.org/amigo/term/GO:0030551	23	1	0.161809	6.18012	0.150074	1	540535	ENSBTAG00000005604
13	GO:0043028	cysteine-type endopeptidase regulator activity involved in apoptotic process	http://amigo.geneontology.org/amigo/term/GO:0043028	23	1	0.161809	6.18012	0.150074	1	613320	ENSBTAG00000016886
14	GO:0044390	ubiquitin-like protein conjugating enzyme binding	http://amigo.geneontology.org/amigo/term/GO:0044390	23	1	0.161809	6.18012	0.150074	1	507865	ENSBTAG00000008755
15	GO:0016705	oxidoreductase activity, acting on paired donors, with incorporation or reduction of molecular oxygen	http://amigo.geneontology.org/amigo/term/GO:0016705	105	2	0.738693	2.70748	0.168393	1	513221;514141	ENSBTAG00000015582;ENSBTAG00000001171
16	GO:0043177	organic acid binding	http://amigo.geneontology.org/amigo/term/GO:0043177	106	2	0.745729	2.68194	0.170896	1	514141;536956	ENSBTAG00000011399;ENSBTAG00000001171
17	GO:0140104	molecular carrier activity	http://amigo.geneontology.org/amigo/term/GO:0140104	28	1	0.196985	5.07653	0.179645	1	280695	ENSBTAG00000005333
18	GO:0005326	neurotransmitter transporter activity	http://amigo.geneontology.org/amigo/term/GO:0005326	29	1	0.20402	4.90148	0.185437	1	282363	ENSBTAG00000003353
19	GO:0098531	transcription factor activity, direct ligand regulated sequence-specific DNA binding	http://amigo.geneontology.org/amigo/term/GO:0098531	29	1	0.20402	4.90148	0.185437	1	493713	ENSBTAG00000019557
20	GO:0042803	protein homodimerization activity	http://amigo.geneontology.org/amigo/term/GO:0042803	440	5	3.09548	1.61526	0.195866	1	513221;518859;536956;537613;540892	ENSBTAG00000015582;ENSBTAG00000000606;ENSBTAG00000011399;ENSBTAG00000011395;ENSBTAG00000010207
21	GO:0019207	kinase regulator activity	http://amigo.geneontology.org/amigo/term/GO:0019207	119	2	0.837186	2.38896	0.203947	1	327671;613320	ENSBTAG00000011043;ENSBTAG00000016886
22	GO:0048037	cofactor binding	http://amigo.geneontology.org/amigo/term/GO:0048037	339	4	2.38492	1.6772	0.214784	1	280695;511425;513221;514141	ENSBTAG00000015582;ENSBTAG00000005333;ENSBTAG00000001164;ENSBTAG00000001171
23	GO:0016667	oxidoreductase activity, acting on a sulfur group of donors	http://amigo.geneontology.org/amigo/term/GO:0016667	35	1	0.246231	4.06122	0.219353	1	281557	ENSBTAG00000000014
24	GO:0003729	mRNA binding	http://amigo.geneontology.org/amigo/term/GO:0003729	128	2	0.900503	2.22098	0.227244	1	515226;518859	ENSBTAG00000001988;ENSBTAG00000010207
25	GO:0008047	enzyme activator activity	http://amigo.geneontology.org/amigo/term/GO:0008047	235	3	1.65327	1.81459	0.228748	1	507859;525738;613320	ENSBTAG00000009391;ENSBTAG00000007531;ENSBTAG00000016886
26	GO:0000049	tRNA binding	http://amigo.geneontology.org/amigo/term/GO:0000049	37	1	0.260302	3.8417	0.230347	1	536956	ENSBTAG00000011399
27	GO:0072341	modified amino acid binding	http://amigo.geneontology.org/amigo/term/GO:0072341	38	1	0.267337	3.7406	0.235787	1	537613	ENSBTAG00000000606
28	GO:0003707	steroid hormone receptor activity	http://amigo.geneontology.org/amigo/term/GO:0003707	39	1	0.274372	3.64469	0.24119	1	493713	ENSBTAG00000019557
29	GO:0016627	oxidoreductase activity, acting on the CH-CH group of donors	http://amigo.geneontology.org/amigo/term/GO:0016627	43	1	0.302513	3.30565	0.262426	1	511425	ENSBTAG00000001164
30	GO:0005507	copper ion binding	http://amigo.geneontology.org/amigo/term/GO:0005507	44	1	0.309548	3.23052	0.267643	1	613320	ENSBTAG00000016886
31	GO:0004896	cytokine receptor activity	http://amigo.geneontology.org/amigo/term/GO:0004896	50	1	0.351759	2.84286	0.298193	1	528530	ENSBTAG00000009064
32	GO:0003727	single-stranded RNA binding	http://amigo.geneontology.org/amigo/term/GO:0003727	52	1	0.365829	2.73352	0.308096	1	789972	ENSBTAG00000043990
33	GO:0019843	rRNA binding	http://amigo.geneontology.org/amigo/term/GO:0019843	52	1	0.365829	2.73352	0.308096	1	280946	ENSBTAG00000030650
34	GO:0051213	dioxygenase activity	http://amigo.geneontology.org/amigo/term/GO:0051213	52	1	0.365829	2.73352	0.308096	1	514141	ENSBTAG00000001171
35	GO:0030594	neurotransmitter receptor activity	http://amigo.geneontology.org/amigo/term/GO:0030594	55	1	0.386935	2.58442	0.322693	1	539186	ENSBTAG00000001464
36	GO:0042826	histone deacetylase binding	http://amigo.geneontology.org/amigo/term/GO:0042826	55	1	0.386935	2.58442	0.322693	1	518859	ENSBTAG00000010207
37	GO:0000149	SNARE binding	http://amigo.geneontology.org/amigo/term/GO:0000149	58	1	0.40804	2.45074	0.336987	1	537613	ENSBTAG00000000606
38	GO:0008135	translation factor activity, RNA binding	http://amigo.geneontology.org/amigo/term/GO:0008135	58	1	0.40804	2.45074	0.336987	1	515226	ENSBTAG00000001988
39	GO:0032182	ubiquitin-like protein binding	http://amigo.geneontology.org/amigo/term/GO:0032182	59	1	0.415075	2.4092	0.341686	1	507865	ENSBTAG00000008755
40	GO:0015238	drug transmembrane transporter activity	http://amigo.geneontology.org/amigo/term/GO:0015238	62	1	0.436181	2.29263	0.355586	1	282363	ENSBTAG00000003353
41	GO:0016651	oxidoreductase activity, acting on NAD(P)H	http://amigo.geneontology.org/amigo/term/GO:0016651	63	1	0.443216	2.25624	0.360155	1	327706	ENSBTAG00000015892
42	GO:0031072	heat shock protein binding	http://amigo.geneontology.org/amigo/term/GO:0031072	65	1	0.457286	2.18681	0.369198	1	530461	ENSBTAG00000000877
43	GO:0060090	molecular adaptor activity	http://amigo.geneontology.org/amigo/term/GO:0060090	70	1	0.492462	2.03061	0.391261	1	614726	ENSBTAG00000009101
44	GO:0016798	hydrolase activity, acting on glycosyl bonds	http://amigo.geneontology.org/amigo/term/GO:0016798	71	1	0.499497	2.00201	0.395581	1	525738	ENSBTAG00000009391
45	GO:0070851	growth factor receptor binding	http://amigo.geneontology.org/amigo/term/GO:0070851	72	1	0.506533	1.97421	0.399872	1	532649	ENSBTAG00000022069
46	GO:0004386	helicase activity	http://amigo.geneontology.org/amigo/term/GO:0004386	73	1	0.513568	1.94716	0.404132	1	506970	ENSBTAG00000015595
47	GO:0008022	protein C-terminus binding	http://amigo.geneontology.org/amigo/term/GO:0008022	74	1	0.520603	1.92085	0.408363	1	532649	ENSBTAG00000022069
48	GO:0051427	hormone receptor binding	http://amigo.geneontology.org/amigo/term/GO:0051427	77	1	0.541709	1.84601	0.420879	1	281792	ENSBTAG00000003794
49	GO:0016247	channel regulator activity	http://amigo.geneontology.org/amigo/term/GO:0016247	80	1	0.562814	1.77679	0.433135	1	286800	ENSBTAG00000010865
50	GO:0019787	ubiquitin-like protein transferase activity	http://amigo.geneontology.org/amigo/term/GO:0019787	224	2	1.57588	1.26913	0.47056	1	518844;524465	ENSBTAG00000014156;ENSBTAG00000001168
51	GO:0051020	GTPase binding	http://amigo.geneontology.org/amigo/term/GO:0051020	234	2	1.64623	1.2149	0.493635	1	525738;540892	ENSBTAG00000009391;ENSBTAG00000011395
52	GO:0005539	glycosaminoglycan binding	http://amigo.geneontology.org/amigo/term/GO:0005539	96	1	0.675377	1.48065	0.494322	1	534482	ENSBTAG00000022155
53	GO:0019842	vitamin binding	http://amigo.geneontology.org/amigo/term/GO:0019842	97	1	0.682412	1.46539	0.497923	1	514141	ENSBTAG00000001171
54	GO:0050839	cell adhesion molecule binding	http://amigo.geneontology.org/amigo/term/GO:0050839	97	1	0.682412	1.46539	0.497923	1	282644	ENSBTAG00000009080
55	GO:1901681	sulfur compound binding	http://amigo.geneontology.org/amigo/term/GO:1901681	101	1	0.710553	1.40736	0.512077	1	534482	ENSBTAG00000022155
56	GO:0005506	iron ion binding	http://amigo.geneontology.org/amigo/term/GO:0005506	105	1	0.738693	1.35374	0.525838	1	514141	ENSBTAG00000001171
57	GO:0016874	ligase activity	http://amigo.geneontology.org/amigo/term/GO:0016874	107	1	0.752764	1.32844	0.532576	1	536956	ENSBTAG00000011399
58	GO:0046982	protein heterodimerization activity	http://amigo.geneontology.org/amigo/term/GO:0046982	256	2	1.80101	1.11049	0.542179	1	537613;789972	ENSBTAG00000000606;ENSBTAG00000043990
59	GO:0000287	magnesium ion binding	http://amigo.geneontology.org/amigo/term/GO:0000287	124	1	0.872362	1.14631	0.586172	1	525738	ENSBTAG00000009391
60	GO:0016788	hydrolase activity, acting on ester bonds	http://amigo.geneontology.org/amigo/term/GO:0016788	432	3	3.0392	0.987103	0.592744	1	497207;512098;513992	ENSBTAG00000011021;ENSBTAG00000011164;ENSBTAG00000001852
61	GO:0016741	transferase activity, transferring one-carbon groups	http://amigo.geneontology.org/amigo/term/GO:0016741	131	1	0.921608	1.08506	0.606443	1	530461	ENSBTAG00000000877
62	GO:0061134	peptidase regulator activity	http://amigo.geneontology.org/amigo/term/GO:0061134	134	1	0.942714	1.06077	0.614829	1	613320	ENSBTAG00000016886
63	GO:0060589	nucleoside-triphosphatase regulator activity	http://amigo.geneontology.org/amigo/term/GO:0060589	146	1	1.02714	0.973581	0.646653	1	525738	ENSBTAG00000009391
64	GO:0001664	G protein-coupled receptor binding	http://amigo.geneontology.org/amigo/term/GO:0001664	154	1	1.08342	0.923006	0.666419	1	281792	ENSBTAG00000003794
65	GO:0016746	transferase activity, transferring acyl groups	http://amigo.geneontology.org/amigo/term/GO:0016746	154	1	1.08342	0.923006	0.666419	1	514646	ENSBTAG00000019272
66	GO:0033218	amide binding	http://amigo.geneontology.org/amigo/term/GO:0033218	156	1	1.09749	0.911172	0.671188	1	518844	ENSBTAG00000001168
67	GO:0044389	ubiquitin-like protein ligase binding	http://amigo.geneontology.org/amigo/term/GO:0044389	174	1	1.22412	0.816913	0.711206	1	540892	ENSBTAG00000011395
68	GO:0022804	active transmembrane transporter activity	http://amigo.geneontology.org/amigo/term/GO:0022804	191	1	1.34372	0.744203	0.744589	1	282363	ENSBTAG00000003353
69	GO:0008509	anion transmembrane transporter activity	http://amigo.geneontology.org/amigo/term/GO:0008509	193	1	1.35779	0.736491	0.748258	1	282363	ENSBTAG00000003353
70	GO:0008324	cation transmembrane transporter activity	http://amigo.geneontology.org/amigo/term/GO:0008324	377	2	2.65226	0.754074	0.751078	1	282363;286800	ENSBTAG00000010865;ENSBTAG00000003353
71	GO:0004857	enzyme inhibitor activity	http://amigo.geneontology.org/amigo/term/GO:0004857	201	1	1.41407	0.707178	0.762424	1	613320	ENSBTAG00000016886
72	GO:0140098	catalytic activity, acting on RNA	http://amigo.geneontology.org/amigo/term/GO:0140098	238	1	1.67437	0.597239	0.818392	1	536956	ENSBTAG00000011399
73	GO:0003712	transcription coregulator activity	http://amigo.geneontology.org/amigo/term/GO:0003712	246	1	1.73065	0.577816	0.828669	1	493713	ENSBTAG00000019557
74	GO:0022803	passive transmembrane transporter activity	http://amigo.geneontology.org/amigo/term/GO:0022803	250	1	1.75879	0.568571	0.833591	1	286800	ENSBTAG00000010865
75	GO:1990837	sequence-specific double-stranded DNA binding	http://amigo.geneontology.org/amigo/term/GO:1990837	451	2	3.17286	0.630345	0.834543	1	493713;506970	ENSBTAG00000019557;ENSBTAG00000015595
76	GO:0003682	chromatin binding	http://amigo.geneontology.org/amigo/term/GO:0003682	271	1	1.90653	0.524512	0.857241	1	518859	ENSBTAG00000010207
77	GO:0015318	inorganic molecular entity transmembrane transporter activity	http://amigo.geneontology.org/amigo/term/GO:0015318	484	2	3.40503	0.587367	0.863053	1	282363;286800	ENSBTAG00000010865;ENSBTAG00000003353
78	GO:0019904	protein domain specific binding	http://amigo.geneontology.org/amigo/term/GO:0019904	316	1	2.22312	0.449819	0.897355	1	789972	ENSBTAG00000043990
79	GO:0008134	transcription factor binding	http://amigo.geneontology.org/amigo/term/GO:0008134	317	1	2.23015	0.4484	0.898107	1	493713	ENSBTAG00000019557
80	GO:0019900	kinase binding	http://amigo.geneontology.org/amigo/term/GO:0019900	320	1	2.25126	0.444196	0.900331	1	614726	ENSBTAG00000009101
81	GO:0008233	peptidase activity	http://amigo.geneontology.org/amigo/term/GO:0008233	341	1	2.39899	0.416841	0.914616	1	282872	ENSBTAG00000019267
82	GO:0000981	DNA-binding transcription factor activity, RNA polymerase II-specific	http://amigo.geneontology.org/amigo/term/GO:0000981	396	1	2.78593	0.358947	0.943176	1	493713	ENSBTAG00000019557
83	GO:0005198	structural molecule activity	http://amigo.geneontology.org/amigo/term/GO:0005198	405	1	2.84925	0.35097	0.946854	1	510004	ENSBTAG00000006611
84	GO:0008092	cytoskeletal protein binding	http://amigo.geneontology.org/amigo/term/GO:0008092	465	1	3.27136	0.305684	0.96605	1	540892	ENSBTAG00000011395
85	GO:0001067	regulatory region nucleic acid binding	http://amigo.geneontology.org/amigo/term/GO:0001067	500	1	3.51759	0.284286	0.973903	1	493713	ENSBTAG00000019557

## Sheet: Cellular Component
	geneSet	description	link	size	overlap	expect	enrichmentRatio	pValue	FDR	overlapId	userId
1	GO:0043235	receptor complex	http://amigo.geneontology.org/amigo/term/GO:0043235	178	4	1.22976	3.25268	0.033544	1	282644;286800;317777;539186	ENSBTAG00000001464;ENSBTAG00000009080;ENSBTAG00000032515;ENSBTAG00000010865
2	GO:0098797	plasma membrane protein complex	http://amigo.geneontology.org/amigo/term/GO:0098797	287	5	1.98281	2.52168	0.0462964	1	281792;282644;286800;507859;539186	ENSBTAG00000001464;ENSBTAG00000009080;ENSBTAG00000010865;ENSBTAG00000007531;ENSBTAG00000003794
3	GO:0044456	synapse part	http://amigo.geneontology.org/amigo/term/GO:0044456	391	6	2.70132	2.22114	0.0502405	1	282363;286800;507983;537613;540892;613320	ENSBTAG00000004177;ENSBTAG00000010865;ENSBTAG00000000606;ENSBTAG00000011395;ENSBTAG00000003353;ENSBTAG00000016886
4	GO:0048471	perinuclear region of cytoplasm	http://amigo.geneontology.org/amigo/term/GO:0048471	300	5	2.07262	2.4124	0.0541952	1	404070;513221;532649;540892;613320	ENSBTAG00000015582;ENSBTAG00000011395;ENSBTAG00000022069;ENSBTAG00000023659;ENSBTAG00000016886
5	GO:1990204	oxidoreductase complex	http://amigo.geneontology.org/amigo/term/GO:1990204	92	2	0.635604	3.14661	0.132386	1	327706;507859	ENSBTAG00000015892;ENSBTAG00000007531
6	GO:0030133	transport vesicle	http://amigo.geneontology.org/amigo/term/GO:0030133	193	3	1.33339	2.24991	0.147569	1	537613;540892;613320	ENSBTAG00000000606;ENSBTAG00000011395;ENSBTAG00000016886
7	GO:0005905	clathrin-coated pit	http://amigo.geneontology.org/amigo/term/GO:0005905	23	1	0.158901	6.29323	0.147631	1	540892	ENSBTAG00000011395
8	GO:1905360	GTPase complex	http://amigo.geneontology.org/amigo/term/GO:1905360	27	1	0.186536	5.3609	0.171035	1	281792	ENSBTAG00000003794
9	GO:0000118	histone deacetylase complex	http://amigo.geneontology.org/amigo/term/GO:0000118	29	1	0.200353	4.99118	0.1825	1	538649	ENSBTAG00000001161
10	GO:0035770	ribonucleoprotein granule	http://amigo.geneontology.org/amigo/term/GO:0035770	114	2	0.787596	2.53937	0.185746	1	514141;532649	ENSBTAG00000022069;ENSBTAG00000001171
11	GO:0005635	nuclear envelope	http://amigo.geneontology.org/amigo/term/GO:0005635	223	3	1.54065	1.94723	0.198795	1	327671;510004;518844	ENSBTAG00000011043;ENSBTAG00000001168;ENSBTAG00000006611
12	GO:0098685	Schaffer collateral - CA1 synapse	http://amigo.geneontology.org/amigo/term/GO:0098685	33	1	0.227988	4.38619	0.204967	1	286800	ENSBTAG00000010865
13	GO:0030424	axon	http://amigo.geneontology.org/amigo/term/GO:0030424	229	3	1.5821	1.89621	0.209543	1	282651;507983;538603	ENSBTAG00000004177;ENSBTAG00000019159;ENSBTAG00000013918
14	GO:0098552	side of membrane	http://amigo.geneontology.org/amigo/term/GO:0098552	232	3	1.60283	1.87169	0.214968	1	281792;282644;407131	ENSBTAG00000018059;ENSBTAG00000009080;ENSBTAG00000003794
15	GO:0016234	inclusion body	http://amigo.geneontology.org/amigo/term/GO:0016234	35	1	0.241806	4.13555	0.215974	1	613320	ENSBTAG00000016886
16	GO:0005844	polysome	http://amigo.geneontology.org/amigo/term/GO:0005844	37	1	0.255623	3.91201	0.226831	1	532649	ENSBTAG00000022069
17	GO:0099503	secretory vesicle	http://amigo.geneontology.org/amigo/term/GO:0099503	244	3	1.68573	1.77964	0.236973	1	537613;540892;613320	ENSBTAG00000000606;ENSBTAG00000011395;ENSBTAG00000016886
18	GO:0005788	endoplasmic reticulum lumen	http://amigo.geneontology.org/amigo/term/GO:0005788	47	1	0.324711	3.07966	0.278954	1	511862	ENSBTAG00000008562
19	GO:0005811	lipid droplet	http://amigo.geneontology.org/amigo/term/GO:0005811	49	1	0.338528	2.95396	0.288958	1	514646	ENSBTAG00000019272
20	GO:0030964	NADH dehydrogenase complex	http://amigo.geneontology.org/amigo/term/GO:0030964	49	1	0.338528	2.95396	0.288958	1	327706	ENSBTAG00000015892
21	GO:1904949	ATPase complex	http://amigo.geneontology.org/amigo/term/GO:1904949	49	1	0.338528	2.95396	0.288958	1	505539	ENSBTAG00000010533
22	GO:0044306	neuron projection terminus	http://amigo.geneontology.org/amigo/term/GO:0044306	50	1	0.345437	2.89488	0.29391	1	507983	ENSBTAG00000004177
23	GO:0036477	somatodendritic compartment	http://amigo.geneontology.org/amigo/term/GO:0036477	283	3	1.95517	1.53439	0.310769	1	282363;286800;507983	ENSBTAG00000004177;ENSBTAG00000010865;ENSBTAG00000003353
24	GO:0042383	sarcolemma	http://amigo.geneontology.org/amigo/term/GO:0042383	55	1	0.379981	2.63171	0.318166	1	540535	ENSBTAG00000005604
25	GO:0031012	extracellular matrix	http://amigo.geneontology.org/amigo/term/GO:0031012	167	2	1.15376	1.73346	0.321508	1	282872;528562	ENSBTAG00000007259;ENSBTAG00000019267
26	GO:0044297	cell body	http://amigo.geneontology.org/amigo/term/GO:0044297	170	2	1.17449	1.70287	0.329182	1	282363;507983	ENSBTAG00000004177;ENSBTAG00000003353
27	GO:0098862	cluster of actin-based cell projections	http://amigo.geneontology.org/amigo/term/GO:0098862	58	1	0.400707	2.49559	0.332327	1	540892	ENSBTAG00000011395
28	GO:0034399	nuclear periphery	http://amigo.geneontology.org/amigo/term/GO:0034399	61	1	0.421433	2.37286	0.3462	1	510004	ENSBTAG00000006611
29	GO:0042579	microbody	http://amigo.geneontology.org/amigo/term/GO:0042579	77	1	0.531973	1.87979	0.415569	1	540892	ENSBTAG00000011395
30	GO:0098858	actin-based cell projection	http://amigo.geneontology.org/amigo/term/GO:0098858	78	1	0.538882	1.85569	0.419657	1	100126272	ENSBTAG00000038195
31	GO:0009986	cell surface	http://amigo.geneontology.org/amigo/term/GO:0009986	340	3	2.34897	1.27715	0.419737	1	282644;317777;407131	ENSBTAG00000018059;ENSBTAG00000009080;ENSBTAG00000032515
32	GO:0097223	sperm part	http://amigo.geneontology.org/amigo/term/GO:0097223	86	1	0.594152	1.68307	0.451373	1	617147	ENSBTAG00000026657
33	GO:0070469	respiratory chain	http://amigo.geneontology.org/amigo/term/GO:0070469	88	1	0.607969	1.64482	0.459034	1	327706	ENSBTAG00000015892
34	GO:0016604	nuclear body	http://amigo.geneontology.org/amigo/term/GO:0016604	368	3	2.54242	1.17998	0.471655	1	493713;518859;536956	ENSBTAG00000019557;ENSBTAG00000011399;ENSBTAG00000010207
35	GO:0044431	Golgi apparatus part	http://amigo.geneontology.org/amigo/term/GO:0044431	376	3	2.59769	1.15487	0.486146	1	505267;514646;532649	ENSBTAG00000015043;ENSBTAG00000022069;ENSBTAG00000019272
36	GO:0098984	neuron to neuron synapse	http://amigo.geneontology.org/amigo/term/GO:0098984	101	1	0.697783	1.43311	0.506341	1	286800	ENSBTAG00000010865
37	GO:0005759	mitochondrial matrix	http://amigo.geneontology.org/amigo/term/GO:0005759	245	2	1.69264	1.18159	0.50952	1	280946;530461	ENSBTAG00000030650;ENSBTAG00000000877
38	GO:0019867	outer membrane	http://amigo.geneontology.org/amigo/term/GO:0019867	102	1	0.704692	1.41906	0.509808	1	540892	ENSBTAG00000011395
39	GO:0045111	intermediate filament cytoskeleton	http://amigo.geneontology.org/amigo/term/GO:0045111	105	1	0.725418	1.37852	0.520066	1	493713	ENSBTAG00000019557
40	GO:0098978	glutamatergic synapse	http://amigo.geneontology.org/amigo/term/GO:0098978	122	1	0.842866	1.18643	0.574355	1	286800	ENSBTAG00000010865
41	GO:0031300	intrinsic component of organelle membrane	http://amigo.geneontology.org/amigo/term/GO:0031300	132	1	0.911954	1.09655	0.603437	1	505267	ENSBTAG00000015043
42	GO:0030054	cell junction	http://amigo.geneontology.org/amigo/term/GO:0030054	451	3	3.11584	0.962822	0.612113	1	282644;282651;540892	ENSBTAG00000009080;ENSBTAG00000011395;ENSBTAG00000013918
43	GO:0000228	nuclear chromosome	http://amigo.geneontology.org/amigo/term/GO:0000228	302	2	2.08644	0.958571	0.624834	1	505539;538649	ENSBTAG00000010533;ENSBTAG00000001161
44	GO:0000785	chromatin	http://amigo.geneontology.org/amigo/term/GO:0000785	304	2	2.10026	0.952264	0.62849	1	505539;538649	ENSBTAG00000010533;ENSBTAG00000001161
45	GO:0019898	extrinsic component of membrane	http://amigo.geneontology.org/amigo/term/GO:0019898	145	1	1.00177	0.998236	0.638357	1	281792	ENSBTAG00000003794
46	GO:0098590	plasma membrane region	http://amigo.geneontology.org/amigo/term/GO:0098590	474	3	3.27474	0.916102	0.6466	1	282113;282363;286800	ENSBTAG00000009014;ENSBTAG00000010865;ENSBTAG00000003353
47	GO:0045177	apical part of cell	http://amigo.geneontology.org/amigo/term/GO:0045177	149	1	1.0294	0.971437	0.648484	1	282113	ENSBTAG00000009014
48	GO:1990234	transferase complex	http://amigo.geneontology.org/amigo/term/GO:1990234	493	3	3.40601	0.880796	0.673496	1	518844;524465;614912	ENSBTAG00000030646;ENSBTAG00000014156;ENSBTAG00000001168
49	GO:1990351	transporter complex	http://amigo.geneontology.org/amigo/term/GO:1990351	160	1	1.1054	0.904651	0.674925	1	286800	ENSBTAG00000010865
50	GO:0031252	cell leading edge	http://amigo.geneontology.org/amigo/term/GO:0031252	164	1	1.13303	0.882587	0.684051	1	327671	ENSBTAG00000011043
51	GO:0005815	microtubule organizing center	http://amigo.geneontology.org/amigo/term/GO:0005815	371	2	2.56314	0.780292	0.735905	1	282644;518859	ENSBTAG00000009080;ENSBTAG00000010207
52	GO:0005667	transcription factor complex	http://amigo.geneontology.org/amigo/term/GO:0005667	192	1	1.32648	0.753876	0.74128	1	493713	ENSBTAG00000019557
53	GO:0044433	cytoplasmic vesicle part	http://amigo.geneontology.org/amigo/term/GO:0044433	393	2	2.71513	0.736612	0.765099	1	507859;540892	ENSBTAG00000007531;ENSBTAG00000011395
54	GO:0099568	cytoplasmic region	http://amigo.geneontology.org/amigo/term/GO:0099568	216	1	1.49229	0.670112	0.782169	1	100126272	ENSBTAG00000038195
55	GO:0099080	supramolecular complex	http://amigo.geneontology.org/amigo/term/GO:0099080	418	2	2.88785	0.692556	0.794939	1	327671;540892	ENSBTAG00000011043;ENSBTAG00000011395
56	GO:0012506	vesicle membrane	http://amigo.geneontology.org/amigo/term/GO:0012506	230	1	1.58901	0.629323	0.803031	1	540892	ENSBTAG00000011395
57	GO:0015629	actin cytoskeleton	http://amigo.geneontology.org/amigo/term/GO:0015629	230	1	1.58901	0.629323	0.803031	1	327671	ENSBTAG00000011043
58	GO:0005768	endosome	http://amigo.geneontology.org/amigo/term/GO:0005768	426	2	2.94312	0.67955	0.803778	1	504912;507859	ENSBTAG00000045785;ENSBTAG00000007531
59	GO:0098798	mitochondrial protein complex	http://amigo.geneontology.org/amigo/term/GO:0098798	236	1	1.63046	0.613323	0.811362	1	327706	ENSBTAG00000015892
60	GO:0098827	endoplasmic reticulum subcompartment	http://amigo.geneontology.org/amigo/term/GO:0098827	471	2	3.25402	0.614625	0.847615	1	513221;539837	ENSBTAG00000015582;ENSBTAG00000030632
61	GO:0042175	nuclear outer membrane-endoplasmic reticulum membrane network	http://amigo.geneontology.org/amigo/term/GO:0042175	476	2	3.28856	0.608169	0.851911	1	513221;539837	ENSBTAG00000015582;ENSBTAG00000030632
62	GO:0005740	mitochondrial envelope	http://amigo.geneontology.org/amigo/term/GO:0005740	490	2	3.38528	0.590793	0.863374	1	327706;540892	ENSBTAG00000015892;ENSBTAG00000011395
63	GO:0005929	cilium	http://amigo.geneontology.org/amigo/term/GO:0005929	296	1	2.04499	0.489001	0.877848	1	617147	ENSBTAG00000026657
64	GO:0019866	organelle inner membrane	http://amigo.geneontology.org/amigo/term/GO:0019866	379	1	2.61841	0.381911	0.933528	1	327706	ENSBTAG00000015892
65	GO:0005730	nucleolus	http://amigo.geneontology.org/amigo/term/GO:0005730	491	1	3.39219	0.294795	0.971159	1	281557	ENSBTAG00000000014
