# Supplementary material for: Characterization of Runs of Homozygosity, Heterozygosity-Enriched Regions, and Population Structure in Cattle Populations Selected for Different Breeding Goals
Source: Research Square preprint supplement (doi:10.21203/rs.3.rs-785546/v1), 2021-08-23
Supplement: Supplementary file 2 [file 95270eb8a00f57891c5baa22.xlsx]

## Sheet: Ensembl gene id
Senepol - results Homozygosity Island
	group	CHR	BP1	BP2	chr	start_pos	end_pos	width	strand	gene_id	gene_name	gene_biotype
1	SEN	1	776231	10605227	1	764121	820845	56725	-	ENSBTAG00000001753	#N/A	protein_coding
2	SEN	1	776231	10605227	1	882081	1002223	120143	+	ENSBTAG00000020035	RCAN1	protein_coding
3	SEN	1	776231	10605227	1	904168	904713	546	-	ENSBTAG00000005540	CBX3	protein_coding
4	SEN	1	776231	10605227	1	1040523	1047017	6495	+	ENSBTAG00000001150	KCNE1	protein_coding
5	SEN	1	776231	10605227	1	1061262	1061597	336	+	ENSBTAG00000026259	#N/A	protein_coding
6	SEN	1	776231	10605227	1	1071552	1077244	5693	+	ENSBTAG00000051226	#N/A	protein_coding
7	SEN	1	776231	10605227	1	1099127	1100145	1019	-	ENSBTAG00000013841	FAM243A	protein_coding
8	SEN	1	776231	10605227	1	1102887	1118312	15426	-	ENSBTAG00000011528	SMIM11A	protein_coding
9	SEN	1	776231	10605227	1	1123943	1131748	7806	-	ENSBTAG00000026260	KCNE2	protein_coding
10	SEN	1	776231	10605227	1	1375581	1379969	4389	-	ENSBTAG00000054497	#N/A	lncRNA
11	SEN	1	776231	10605227	1	1390803	1455219	64417	-	ENSBTAG00000012594	MRPS6	protein_coding
12	SEN	1	776231	10605227	1	1472144	1472250	107	+	ENSBTAG00000049850	U6	snRNA
13	SEN	1	776231	10605227	1	1643628	1651039	7412	+	ENSBTAG00000018278	ATP5PO	protein_coding
14	SEN	1	776231	10605227	1	1665339	1908788	243450	-	ENSBTAG00000021997	ITSN1	protein_coding
15	SEN	1	776231	10605227	1	1666063	1666125	63	-	ENSBTAG00000054338	bta-mir-12045	miRNA
16	SEN	1	776231	10605227	1	1727075	1727135	61	-	ENSBTAG00000053248	bta-mir-2285bs	miRNA
17	SEN	1	776231	10605227	1	1909498	1943914	34417	+	ENSBTAG00000008490	CRYZL1	protein_coding
18	SEN	1	776231	10605227	1	1942815	1954023	11209	+	ENSBTAG00000035175	DONSON	protein_coding
19	SEN	1	776231	10605227	1	1954230	1985068	30839	-	ENSBTAG00000008482	SON	protein_coding
20	SEN	1	776231	10605227	1	1978829	1978892	64	-	ENSBTAG00000052933	bta-mir-6501	miRNA
21	SEN	1	776231	10605227	1	1985522	2012383	26862	+	ENSBTAG00000009188	GART	protein_coding
22	SEN	1	776231	10605227	1	2028900	2030042	1143	+	ENSBTAG00000009187	DNAJC28	protein_coding
23	SEN	1	776231	10605227	1	2046733	2083566	36834	+	ENSBTAG00000001258	TMEM50B	protein_coding
24	SEN	1	776231	10605227	1	2089684	2089808	125	-	ENSBTAG00000043399	#N/A	snoRNA
25	SEN	1	776231	10605227	1	2098968	2124278	25311	-	ENSBTAG00000012899	IFNGR2	protein_coding
26	SEN	1	776231	10605227	1	2189895	2218344	28450	-	ENSBTAG00000021819	IFNAR1	protein_coding
27	SEN	1	776231	10605227	1	2242523	2314142	71620	-	ENSBTAG00000019404	IL10RB	protein_coding
28	SEN	1	776231	10605227	1	2315596	2350090	34495	-	ENSBTAG00000015212	IFNAR2	protein_coding
29	SEN	1	776231	10605227	1	2398499	2398810	312	+	ENSBTAG00000051429	#N/A	protein_coding
30	SEN	1	776231	10605227	1	2410576	2410773	198	-	ENSBTAG00000051548	#N/A	protein_coding
31	SEN	1	776231	10605227	1	2497798	2499871	2074	-	ENSBTAG00000037547	OLIG1	protein_coding
32	SEN	1	776231	10605227	1	2506295	2508518	2224	-	ENSBTAG00000054023	#N/A	lncRNA
33	SEN	1	776231	10605227	1	2547063	2548046	984	-	ENSBTAG00000049136	OLIG2	protein_coding
34	SEN	1	776231	10605227	1	2749168	2768577	19410	+	ENSBTAG00000043993	C1H21orf62	protein_coding
35	SEN	1	776231	10605227	1	2786812	2819637	32826	+	ENSBTAG00000003064	PAXBP1	protein_coding
36	SEN	1	776231	10605227	1	2827691	2916599	88909	+	ENSBTAG00000003063	SYNJ1	protein_coding
37	SEN	1	776231	10605227	1	2843057	2843218	162	-	ENSBTAG00000035493	#N/A	processed_pseudogene
38	SEN	1	776231	10605227	1	2924656	2936276	11621	+	ENSBTAG00000003059	CFAP298	protein_coding
39	SEN	1	776231	10605227	1	2978428	3080528	102101	-	ENSBTAG00000017310	EVA1C	protein_coding
40	SEN	1	776231	10605227	1	3103263	3180340	77078	+	ENSBTAG00000012412	URB1	protein_coding
41	SEN	1	776231	10605227	1	3183412	3197291	13880	-	ENSBTAG00000023718	MRAP	protein_coding
42	SEN	1	776231	10605227	1	3209824	3222938	13115	+	ENSBTAG00000016619	MIS18A	protein_coding
43	SEN	1	776231	10605227	1	3501645	3629427	127783	-	ENSBTAG00000020762	HUNK	protein_coding
44	SEN	1	776231	10605227	1	3760509	3822150	61642	+	ENSBTAG00000018855	SCAF4	protein_coding
45	SEN	1	776231	10605227	1	3824601	3833406	8806	-	ENSBTAG00000018854	SOD1	protein_coding
46	SEN	1	776231	10605227	1	3966946	4169576	202631	+	ENSBTAG00000051337	#N/A	lncRNA
47	SEN	1	776231	10605227	1	4192104	4358253	166150	+	ENSBTAG00000017839	TIAM1	protein_coding
48	SEN	1	776231	10605227	1	4288068	4288144	77	+	ENSBTAG00000044299	bta-mir-2284i	miRNA
49	SEN	1	776231	10605227	1	4315515	4315610	96	-	ENSBTAG00000046072	bta-mir-2284x	miRNA
50	SEN	1	776231	10605227	1	4381315	4431774	50460	+	ENSBTAG00000048631	#N/A	protein_coding
51	SEN	1	776231	10605227	1	4673635	4674514	880	+	ENSBTAG00000034869	KRTAP11-1	protein_coding
52	SEN	1	776231	10605227	1	4736889	4737152	264	+	ENSBTAG00000046804	KRTAP7-1	protein_coding
53	SEN	1	776231	10605227	1	4759050	4760169	1120	+	ENSBTAG00000015812	KRTAP8-1	protein_coding
54	SEN	1	776231	10605227	1	4770078	4770269	192	+	ENSBTAG00000048503	#N/A	protein_coding
55	SEN	1	776231	10605227	1	4845319	4845591	273	-	ENSBTAG00000050662	#N/A	protein_coding
56	SEN	1	776231	10605227	1	4857239	4857508	270	+	ENSBTAG00000054173	#N/A	protein_coding
57	SEN	1	776231	10605227	1	4868145	4868417	273	-	ENSBTAG00000049506	#N/A	protein_coding
58	SEN	1	776231	10605227	1	4913814	4914086	273	+	ENSBTAG00000049468	#N/A	protein_coding
59	SEN	1	776231	10605227	1	4925768	4926037	270	-	ENSBTAG00000052340	#N/A	protein_coding
60	SEN	1	776231	10605227	1	4957550	4957843	294	-	ENSBTAG00000044154	#N/A	protein_coding
61	SEN	1	776231	10605227	1	5108146	5108242	97	+	ENSBTAG00000045424	U6	snRNA
62	SEN	1	776231	10605227	1	5173646	5173873	228	-	ENSBTAG00000052530	#N/A	protein_coding
63	SEN	1	776231	10605227	1	5195059	5195313	255	-	ENSBTAG00000051544	#N/A	protein_coding
64	SEN	1	776231	10605227	1	5389438	5389653	216	+	ENSBTAG00000052321	#N/A	protein_coding
65	SEN	1	776231	10605227	1	5448262	5448483	222	+	ENSBTAG00000053953	#N/A	protein_coding
66	SEN	1	776231	10605227	1	5489982	5490224	243	-	ENSBTAG00000054015	#N/A	protein_coding
67	SEN	1	776231	10605227	1	5506542	5506952	411	-	ENSBTAG00000052457	KRTAP15-1	protein_coding
68	SEN	1	776231	10605227	1	5510180	5511024	845	+	ENSBTAG00000039602	KRTAP13-1	protein_coding
69	SEN	1	776231	10605227	1	5522179	5581920	59742	+	ENSBTAG00000050522	#N/A	protein_coding
70	SEN	1	776231	10605227	1	5560876	5561253	378	-	ENSBTAG00000037933	#N/A	protein_coding
71	SEN	1	776231	10605227	1	5581423	5586373	4951	+	ENSBTAG00000055221	#N/A	protein_coding
72	SEN	1	776231	10605227	1	5627779	5628384	606	+	ENSBTAG00000052202	KRTAP27-1	protein_coding
73	SEN	1	776231	10605227	1	5689903	5690709	807	+	ENSBTAG00000046384	KRTAP24-1	protein_coding
74	SEN	1	776231	10605227	1	5770225	5772218	1994	+	ENSBTAG00000039820	CLDN8	protein_coding
75	SEN	1	776231	10605227	1	5830120	5830797	678	+	ENSBTAG00000039255	CLDN17	protein_coding
76	SEN	1	776231	10605227	1	6112447	6577795	465349	+	ENSBTAG00000034854	GRIK1	protein_coding
77	SEN	1	776231	10605227	1	6778741	6778863	123	-	ENSBTAG00000042595	U6	snRNA
78	SEN	1	776231	10605227	1	6815185	6858058	42874	-	ENSBTAG00000004139	BACH1	protein_coding
79	SEN	1	776231	10605227	1	7005502	7053831	48330	-	ENSBTAG00000007444	MAP3K7CL	protein_coding
80	SEN	1	776231	10605227	1	7114205	7127950	13746	+	ENSBTAG00000014233	CCT8	protein_coding
81	SEN	1	776231	10605227	1	7129414	7155271	25858	-	ENSBTAG00000020122	USP16	protein_coding
82	SEN	1	776231	10605227	1	7167841	7170830	2990	+	ENSBTAG00000020121	RWDD2B	protein_coding
83	SEN	1	776231	10605227	1	7183913	7240822	56910	+	ENSBTAG00000000201	LTN1	protein_coding
84	SEN	1	776231	10605227	1	7246094	7246462	369	+	ENSBTAG00000038433	#N/A	protein_coding
85	SEN	1	776231	10605227	1	7259998	7280970	20973	-	ENSBTAG00000001412	N6AMT1	protein_coding
86	SEN	1	776231	10605227	1	7430160	7430266	107	-	ENSBTAG00000045479	U6	snRNA
87	SEN	1	776231	10605227	1	8918075	8918386	312	+	ENSBTAG00000052349	H4C16	protein_coding
88	SEN	1	776231	10605227	1	8960274	8960585	312	+	ENSBTAG00000052332	H4C13	protein_coding
89	SEN	1	776231	10605227	1	9440973	9491324	50352	+	ENSBTAG00000000648	ADAMTS5	protein_coding
90	SEN	1	776231	10605227	1	9583345	9592271	8927	+	ENSBTAG00000000706	ADAMTS1	protein_coding
91	SEN	1	776231	10605227	1	9689994	9690055	62	-	ENSBTAG00000045024	U6	snRNA
92	SEN	1	776231	10605227	1	9868852	10011696	142845	+	ENSBTAG00000050914	CYYR1	protein_coding
93	SEN	1	776231	10605227	1	10180008	10180114	107	+	ENSBTAG00000050144	U6	snRNA
94	SEN	1	776231	10605227	1	10231296	10543984	312689	+	ENSBTAG00000017753	APP	protein_coding
95	SEN	1	776231	10605227	1	10488768	10488874	107	+	ENSBTAG00000042557	U6	snRNA
96	SEN	20	36135896	42174483	20	35967736	36272653	304918	-	ENSBTAG00000019595	EGFLAM	protein_coding
97	SEN	20	36135896	42174483	20	36453714	36453849	136	+	ENSBTAG00000051126	#N/A	snoRNA
98	SEN	20	36135896	42174483	20	36453725	36453848	124	+	ENSBTAG00000044244	#N/A	snoRNA
99	SEN	20	36135896	42174483	20	36506697	36506803	107	-	ENSBTAG00000051161	U6	snRNA
100	SEN	20	36135896	42174483	20	36599080	36599186	107	-	ENSBTAG00000052182	U6	snRNA
101	SEN	20	36135896	42174483	20	36614256	36639869	25614	+	ENSBTAG00000005176	GDNF	protein_coding
102	SEN	20	36135896	42174483	20	36672888	36968945	296058	-	ENSBTAG00000033095	WDR70	protein_coding
103	SEN	20	36135896	42174483	20	36974339	37025868	51530	+	ENSBTAG00000002458	NUP155	protein_coding
104	SEN	20	36135896	42174483	20	37041992	37042061	70	-	ENSBTAG00000045286	bta-mir-2360	miRNA
105	SEN	20	36135896	42174483	20	37045115	37150094	104980	+	ENSBTAG00000000586	CPLANE1	protein_coding
106	SEN	20	36135896	42174483	20	37164880	37370342	205463	-	ENSBTAG00000000579	NIPBL	protein_coding
107	SEN	20	36135896	42174483	20	37168341	37169789	1449	+	ENSBTAG00000050782	#N/A	protein_coding
108	SEN	20	36135896	42174483	20	37571932	37652390	80459	-	ENSBTAG00000018245	SLC1A3	protein_coding
109	SEN	20	36135896	42174483	20	37819257	37824379	5123	+	ENSBTAG00000054657	#N/A	lncRNA
110	SEN	20	36135896	42174483	20	37827306	37864997	37692	-	ENSBTAG00000052326	#N/A	lncRNA
111	SEN	20	36135896	42174483	20	37926761	37934900	8140	-	ENSBTAG00000053704	#N/A	lncRNA
112	SEN	20	36135896	42174483	20	37936883	37991125	54243	+	ENSBTAG00000008430	RANBP3L	protein_coding
113	SEN	20	36135896	42174483	20	37998818	38044180	45363	+	ENSBTAG00000011334	NADK2	protein_coding
114	SEN	20	36135896	42174483	20	38040008	38088539	48532	-	ENSBTAG00000013562	SKP2	protein_coding
115	SEN	20	36135896	42174483	20	38105482	38135086	29605	+	ENSBTAG00000020142	LMBRD2	protein_coding
116	SEN	20	36135896	42174483	20	38153885	38230788	76904	+	ENSBTAG00000002701	UGT3A2	protein_coding
117	SEN	20	36135896	42174483	20	38193605	38230498	36894	+	ENSBTAG00000050563	#N/A	protein_coding
118	SEN	20	36135896	42174483	20	38238510	38275199	36690	+	ENSBTAG00000012688	CAPSL	protein_coding
119	SEN	20	36135896	42174483	20	38299694	38334389	34696	-	ENSBTAG00000019975	IL7R	protein_coding
120	SEN	20	36135896	42174483	20	38369475	38572090	202616	-	ENSBTAG00000023529	SPEF2	protein_coding
121	SEN	20	36135896	42174483	20	38971752	39100563	128812	+	ENSBTAG00000025035	PRLR	protein_coding
122	SEN	20	36135896	42174483	20	39119608	39162311	42704	+	ENSBTAG00000007690	AGXT2	protein_coding
123	SEN	20	36135896	42174483	20	39183189	39214779	31591	-	ENSBTAG00000015648	DNAJC21	protein_coding
124	SEN	20	36135896	42174483	20	39219143	39228770	9628	-	ENSBTAG00000019211	BRIX1	protein_coding
125	SEN	20	36135896	42174483	20	39227867	39234623	6757	+	ENSBTAG00000019209	RAD1	protein_coding
126	SEN	20	36135896	42174483	20	39249515	39306162	56648	-	ENSBTAG00000032933	TTC23L	protein_coding
127	SEN	20	36135896	42174483	20	39292894	39293044	151	-	ENSBTAG00000037206	U1	snRNA
128	SEN	20	36135896	42174483	20	39314838	39473962	159125	-	ENSBTAG00000007071	RAI14	protein_coding
129	SEN	20	36135896	42174483	20	39720311	39752581	32271	+	ENSBTAG00000017071	C1QTNF3	protein_coding
130	SEN	20	36135896	42174483	20	39744973	39745079	107	-	ENSBTAG00000053566	U6	snRNA
131	SEN	20	36135896	42174483	20	39765282	39781002	15721	+	ENSBTAG00000021813	AMACR	protein_coding
132	SEN	20	36135896	42174483	20	39789136	39827963	38828	+	ENSBTAG00000018235	SLC45A2	protein_coding
133	SEN	20	36135896	42174483	20	39835996	39837372	1377	-	ENSBTAG00000039929	RXFP3	protein_coding
134	SEN	20	36135896	42174483	20	39873127	40265889	392763	+	ENSBTAG00000012558	ADAMTS12	protein_coding
135	SEN	20	36135896	42174483	20	40309676	40332876	23201	-	ENSBTAG00000014261	TARS1	protein_coding
136	SEN	20	36135896	42174483	20	40374459	40374522	64	-	ENSBTAG00000050017	bta-mir-12058	miRNA
137	SEN	20	36135896	42174483	20	40884645	40887136	2492	-	ENSBTAG00000052313	#N/A	protein_coding
138	SEN	20	36135896	42174483	20	40918778	40995857	77080	-	ENSBTAG00000007665	NPR3	protein_coding
139	SEN	20	36135896	42174483	20	41067802	41130663	62862	-	ENSBTAG00000021965	SUB1	protein_coding
140	SEN	20	36135896	42174483	20	41213852	41297142	83291	+	ENSBTAG00000008414	ZFR	protein_coding
141	SEN	20	36135896	42174483	20	41323015	41391311	68297	+	ENSBTAG00000012278	MTMR12	protein_coding
142	SEN	20	36135896	42174483	20	41439630	41491576	51947	+	ENSBTAG00000032848	GOLPH3	protein_coding
143	SEN	20	36135896	42174483	20	41504814	41907383	402570	-	ENSBTAG00000014455	PDZD2	protein_coding
144	SEN	20	36135896	42174483	20	41946914	41947216	303	-	ENSBTAG00000049212	#N/A	processed_pseudogene
145	SEN	20	36135896	42174483	20	41983392	41999154	15763	-	ENSBTAG00000017569	C20H5orf22	protein_coding
146	SEN	20	36135896	42174483	20	41999320	42122009	122690	+	ENSBTAG00000017551	DROSHA	protein_coding

## Sheet: TOP100
	geneSet	description	link	size	overlap	expect	enrichmentRatio	pValue	FDR	overlapId	userId
1	bta04630	JAK-STAT signaling pathway	http://www.kegg.jp/kegg-bin/show_pathway?bta04630+281422+282257+282258+514889+521554+767864	202	6	0.656239	9.14301	3.69816e-05	0.0119451	281422;282257;282258;514889;521554;767864	ENSBTAG00000012899;ENSBTAG00000021819;ENSBTAG00000019404;ENSBTAG00000015212;ENSBTAG00000019975;ENSBTAG00000025035
2	bta04060	Cytokine-cytokine receptor interaction	http://www.kegg.jp/kegg-bin/show_pathway?bta04060+281422+282257+282258+514889+521554+767864	323	6	1.04933	5.71792	0.000487162	0.0786766	281422;282257;282258;514889;521554;767864	ENSBTAG00000012899;ENSBTAG00000021819;ENSBTAG00000019404;ENSBTAG00000015212;ENSBTAG00000019975;ENSBTAG00000025035
3	bta05160	Hepatitis C	http://www.kegg.jp/kegg-bin/show_pathway?bta05160+282257+282258+512703+538761	139	4	0.45157	8.85798	0.000975175	0.104994	282257;282258;512703;538761	ENSBTAG00000021819;ENSBTAG00000015212;ENSBTAG00000039820;ENSBTAG00000039255
4	bta05168	Herpes simplex infection	http://www.kegg.jp/kegg-bin/show_pathway?bta05168+282257+282258+514889+519018	198	4	0.643244	6.21848	0.00356876	0.288178	282257;282258;514889;519018	ENSBTAG00000012899;ENSBTAG00000021819;ENSBTAG00000015212;ENSBTAG00000013562
5	bta04650	Natural killer cell mediated cytotoxicity	http://www.kegg.jp/kegg-bin/show_pathway?bta04650+282257+282258+514889	131	3	0.425581	7.04919	0.00849118	0.476477	282257;282258;514889	ENSBTAG00000012899;ENSBTAG00000021819;ENSBTAG00000015212
6	bta04380	Osteoclast differentiation	http://www.kegg.jp/kegg-bin/show_pathway?bta04380+282257+282258+514889	133	3	0.432078	6.94319	0.00885096	0.476477	282257;282258;514889	ENSBTAG00000012899;ENSBTAG00000021819;ENSBTAG00000015212
7	bta05162	Measles	http://www.kegg.jp/kegg-bin/show_pathway?bta05162+282257+282258+514889	146	3	0.474311	6.32496	0.0114084	0.526418	282257;282258;514889	ENSBTAG00000012899;ENSBTAG00000021819;ENSBTAG00000015212
8	bta04217	Necroptosis	http://www.kegg.jp/kegg-bin/show_pathway?bta04217+282257+282258+514889	177	3	0.575021	5.2172	0.0190869	0.716013	282257;282258;514889	ENSBTAG00000012899;ENSBTAG00000021819;ENSBTAG00000015212
9	bta05164	Influenza A	http://www.kegg.jp/kegg-bin/show_pathway?bta05164+282257+282258+514889	180	3	0.584767	5.13025	0.0199508	0.716013	282257;282258;514889	ENSBTAG00000012899;ENSBTAG00000021819;ENSBTAG00000015212
10	bta05167	Kaposi sarcoma-associated herpesvirus infection	http://www.kegg.jp/kegg-bin/show_pathway?bta05167+282257+282258+539640	206	3	0.669234	4.48274	0.0283437	0.832878	282257;282258;539640	ENSBTAG00000020035;ENSBTAG00000021819;ENSBTAG00000015212
11	bta04146	Peroxisome	http://www.kegg.jp/kegg-bin/show_pathway?bta04146+281495+540376	84	2	0.272891	7.32892	0.0300876	0.832878	281495;540376	ENSBTAG00000018854;ENSBTAG00000021813
12	bta04151	PI3K-Akt signaling pathway	http://www.kegg.jp/kegg-bin/show_pathway?bta04151+281422+282257+282258+521554	373	4	1.21177	3.30096	0.0309428	0.832878	281422;282257;282258;521554	ENSBTAG00000021819;ENSBTAG00000015212;ENSBTAG00000019975;ENSBTAG00000025035
13	bta05169	Epstein-Barr virus infection	http://www.kegg.jp/kegg-bin/show_pathway?bta05169+282257+282258+519018	227	3	0.737456	4.06804	0.0363079	0.902112	282257;282258;519018	ENSBTAG00000021819;ENSBTAG00000015212;ENSBTAG00000013562
14	bta04620	Toll-like receptor signaling pathway	http://www.kegg.jp/kegg-bin/show_pathway?bta04620+282257+282258	110	2	0.357358	5.59663	0.0491521	1	282257;282258	ENSBTAG00000021819;ENSBTAG00000015212
15	bta04670	Leukocyte transendothelial migration	http://www.kegg.jp/kegg-bin/show_pathway?bta04670+512703+538761	113	2	0.367104	5.44805	0.0515765	1	512703;538761	ENSBTAG00000039820;ENSBTAG00000039255
16	bta05145	Toxoplasmosis	http://www.kegg.jp/kegg-bin/show_pathway?bta05145+514889+767864	113	2	0.367104	5.44805	0.0515765	1	514889;767864	ENSBTAG00000012899;ENSBTAG00000019404
17	bta00120	Primary bile acid biosynthesis	http://www.kegg.jp/kegg-bin/show_pathway?bta00120+540376	17	1	0.055228	18.1068	0.0538662	1	540376	ENSBTAG00000021813
18	bta00670	One carbon pool by folate	http://www.kegg.jp/kegg-bin/show_pathway?bta00670+281183	18	1	0.0584767	17.1008	0.0569462	1	281183	ENSBTAG00000009188
19	bta04068	FoxO signaling pathway	http://www.kegg.jp/kegg-bin/show_pathway?bta04068+519018+521554	132	2	0.428829	4.66386	0.0678853	1	519018;521554	ENSBTAG00000013562;ENSBTAG00000019975
20	bta04514	Cell adhesion molecules (CAMs)	http://www.kegg.jp/kegg-bin/show_pathway?bta04514+512703+538761	156	2	0.506798	3.94634	0.0905684	1	512703;538761	ENSBTAG00000039820;ENSBTAG00000039255
21	bta00760	Nicotinate and nicotinamide metabolism	http://www.kegg.jp/kegg-bin/show_pathway?bta00760+506968	32	1	0.103959	9.61921	0.0990656	1	506968	ENSBTAG00000011334
22	bta05020	Prion diseases	http://www.kegg.jp/kegg-bin/show_pathway?bta05020+281495	32	1	0.103959	9.61921	0.0990656	1	281495	ENSBTAG00000018854
23	bta00250	Alanine, aspartate and glutamate metabolism	http://www.kegg.jp/kegg-bin/show_pathway?bta00250+521553	36	1	0.116953	8.55041	0.110763	1	521553	ENSBTAG00000007690
24	bta04621	NOD-like receptor signaling pathway	http://www.kegg.jp/kegg-bin/show_pathway?bta04621+282257+282258	176	2	0.571772	3.4979	0.110952	1	282257;282258	ENSBTAG00000021819;ENSBTAG00000015212
25	bta04530	Tight junction	http://www.kegg.jp/kegg-bin/show_pathway?bta04530+512703+538761	178	2	0.57827	3.45859	0.113055	1	512703;538761	ENSBTAG00000039820;ENSBTAG00000039255
26	bta05010	Alzheimer disease	http://www.kegg.jp/kegg-bin/show_pathway?bta05010+280722+281640	180	2	0.584767	3.42016	0.115168	1	280722;281640	ENSBTAG00000018278;ENSBTAG00000017753
27	bta05340	Primary immunodeficiency	http://www.kegg.jp/kegg-bin/show_pathway?bta05340+521554	39	1	0.1267	7.89269	0.11944	1	521554	ENSBTAG00000019975
28	bta00260	Glycine, serine and threonine metabolism	http://www.kegg.jp/kegg-bin/show_pathway?bta00260+521553	43	1	0.139694	7.15848	0.130883	1	521553	ENSBTAG00000007690
29	bta01523	Antifolate resistance	http://www.kegg.jp/kegg-bin/show_pathway?bta01523+281183	43	1	0.139694	7.15848	0.130883	1	281183	ENSBTAG00000009188
30	bta05152	Tuberculosis	http://www.kegg.jp/kegg-bin/show_pathway?bta05152+514889+767864	197	2	0.639995	3.12502	0.133536	1	514889;767864	ENSBTAG00000012899;ENSBTAG00000019404
31	bta00970	Aminoacyl-tRNA biosynthesis	http://www.kegg.jp/kegg-bin/show_pathway?bta00970+510075	44	1	0.142943	6.99579	0.133721	1	510075	ENSBTAG00000014261
32	bta05016	Huntington disease	http://www.kegg.jp/kegg-bin/show_pathway?bta05016+281495+281640	198	2	0.643244	3.10924	0.134637	1	281495;281640	ENSBTAG00000018278;ENSBTAG00000018854
33	bta00270	Cysteine and methionine metabolism	http://www.kegg.jp/kegg-bin/show_pathway?bta00270+521553	47	1	0.152689	6.54925	0.142182	1	521553	ENSBTAG00000007690
34	bta00280	Valine, leucine and isoleucine degradation	http://www.kegg.jp/kegg-bin/show_pathway?bta00280+521553	51	1	0.165684	6.03558	0.15334	1	521553	ENSBTAG00000007690
35	bta05014	Amyotrophic lateral sclerosis (ALS)	http://www.kegg.jp/kegg-bin/show_pathway?bta05014+281495	51	1	0.165684	6.03558	0.15334	1	281495	ENSBTAG00000018854
36	bta04213	Longevity regulating pathway	http://www.kegg.jp/kegg-bin/show_pathway?bta04213+281495	62	1	0.20142	4.96476	0.183308	1	281495	ENSBTAG00000018854
37	bta04927	Cortisol synthesis and secretion	http://www.kegg.jp/kegg-bin/show_pathway?bta04927+505743	63	1	0.204669	4.88595	0.185981	1	505743	ENSBTAG00000023718
38	bta05321	Inflammatory bowel disease (IBD)	http://www.kegg.jp/kegg-bin/show_pathway?bta05321+514889	68	1	0.220912	4.52669	0.199221	1	514889	ENSBTAG00000012899
39	bta00562	Inositol phosphate metabolism	http://www.kegg.jp/kegg-bin/show_pathway?bta00562+282087	73	1	0.237156	4.21664	0.212253	1	282087	ENSBTAG00000003063
40	bta04971	Gastric acid secretion	http://www.kegg.jp/kegg-bin/show_pathway?bta04971+768025	74	1	0.240404	4.15966	0.214835	1	768025	ENSBTAG00000026260
41	bta05140	Leishmaniasis	http://www.kegg.jp/kegg-bin/show_pathway?bta05140+514889	76	1	0.246902	4.05019	0.219974	1	514889	ENSBTAG00000012899
42	bta03008	Ribosome biogenesis in eukaryotes	http://www.kegg.jp/kegg-bin/show_pathway?bta03008+540168	81	1	0.263145	3.80018	0.232681	1	540168	ENSBTAG00000017551
43	bta04917	Prolactin signaling pathway	http://www.kegg.jp/kegg-bin/show_pathway?bta04917+281422	82	1	0.266394	3.75384	0.235198	1	281422	ENSBTAG00000025035
44	bta05132	Salmonella infection	http://www.kegg.jp/kegg-bin/show_pathway?bta05132+514889	85	1	0.27614	3.62135	0.242703	1	514889	ENSBTAG00000012899
45	bta05222	Small cell lung cancer	http://www.kegg.jp/kegg-bin/show_pathway?bta05222+519018	94	1	0.305378	3.27463	0.264793	1	519018	ENSBTAG00000013562
46	bta04658	Th1 and Th2 cell differentiation	http://www.kegg.jp/kegg-bin/show_pathway?bta04658+514889	97	1	0.315125	3.17335	0.272017	1	514889	ENSBTAG00000012899
47	bta04066	HIF-1 signaling pathway	http://www.kegg.jp/kegg-bin/show_pathway?bta04066+514889	98	1	0.318373	3.14097	0.27441	1	514889	ENSBTAG00000012899
48	bta04070	Phosphatidylinositol signaling system	http://www.kegg.jp/kegg-bin/show_pathway?bta04070+282087	99	1	0.321622	3.10924	0.276795	1	282087	ENSBTAG00000003063
49	bta04640	Hematopoietic cell lineage	http://www.kegg.jp/kegg-bin/show_pathway?bta04640+521554	110	1	0.357358	2.79832	0.302541	1	521554	ENSBTAG00000019975
50	bta04659	Th17 cell differentiation	http://www.kegg.jp/kegg-bin/show_pathway?bta04659+514889	112	1	0.363855	2.74835	0.307126	1	514889	ENSBTAG00000012899
51	bta04724	Glutamatergic synapse	http://www.kegg.jp/kegg-bin/show_pathway?bta04724+282354	113	1	0.367104	2.72402	0.309408	1	282354	ENSBTAG00000018245
52	bta04919	Thyroid hormone signaling pathway	http://www.kegg.jp/kegg-bin/show_pathway?bta04919+539640	113	1	0.367104	2.72402	0.309408	1	539640	ENSBTAG00000020035
53	bta05142	Chagas disease (American trypanosomiasis)	http://www.kegg.jp/kegg-bin/show_pathway?bta05142+514889	114	1	0.370353	2.70013	0.311682	1	514889	ENSBTAG00000012899
54	bta04726	Serotonergic synapse	http://www.kegg.jp/kegg-bin/show_pathway?bta04726+280722	116	1	0.37685	2.65358	0.31621	1	280722	ENSBTAG00000017753
55	bta05165	Human papillomavirus infection	http://www.kegg.jp/kegg-bin/show_pathway?bta05165+282257+282258	354	2	1.15004	1.73907	0.320463	1	282257;282258	ENSBTAG00000021819;ENSBTAG00000015212
56	bta04110	Cell cycle	http://www.kegg.jp/kegg-bin/show_pathway?bta04110+519018	123	1	0.399591	2.50256	0.33183	1	519018	ENSBTAG00000013562
57	bta00190	Oxidative phosphorylation	http://www.kegg.jp/kegg-bin/show_pathway?bta00190+281640	140	1	0.454819	2.19868	0.368349	1	281640	ENSBTAG00000018278
58	bta04120	Ubiquitin mediated proteolysis	http://www.kegg.jp/kegg-bin/show_pathway?bta04120+519018	140	1	0.454819	2.19868	0.368349	1	519018	ENSBTAG00000013562
59	bta04261	Adrenergic signaling in cardiomyocytes	http://www.kegg.jp/kegg-bin/show_pathway?bta04261+528014	143	1	0.464565	2.15255	0.374591	1	528014	ENSBTAG00000001150
60	bta05012	Parkinson disease	http://www.kegg.jp/kegg-bin/show_pathway?bta05012+281640	150	1	0.487306	2.0521	0.388925	1	281640	ENSBTAG00000018278
61	bta04921	Oxytocin signaling pathway	http://www.kegg.jp/kegg-bin/show_pathway?bta04921+539640	151	1	0.490555	2.03851	0.390946	1	539640	ENSBTAG00000020035
62	bta04150	mTOR signaling pathway	http://www.kegg.jp/kegg-bin/show_pathway?bta04150+519018	152	1	0.493803	2.0251	0.392962	1	519018	ENSBTAG00000013562
63	bta05161	Hepatitis B	http://www.kegg.jp/kegg-bin/show_pathway?bta05161+282257	152	1	0.493803	2.0251	0.392962	1	282257	ENSBTAG00000021819
64	bta04934	Cushing syndrome	http://www.kegg.jp/kegg-bin/show_pathway?bta04934+505743	154	1	0.500301	1.9988	0.396973	1	505743	ENSBTAG00000023718
65	bta03010	Ribosome	http://www.kegg.jp/kegg-bin/show_pathway?bta03010+615431	158	1	0.513296	1.9482	0.404919	1	615431	ENSBTAG00000012594
66	bta03013	RNA transport	http://www.kegg.jp/kegg-bin/show_pathway?bta03013+506738	164	1	0.532788	1.87692	0.416649	1	506738	ENSBTAG00000002458
67	bta04218	Cellular senescence	http://www.kegg.jp/kegg-bin/show_pathway?bta04218+518502	166	1	0.539285	1.85431	0.42051	1	518502	ENSBTAG00000019209
68	bta00230	Purine metabolism	http://www.kegg.jp/kegg-bin/show_pathway?bta00230+281183	177	1	0.575021	1.73907	0.441306	1	281183	ENSBTAG00000009188
69	bta05205	Proteoglycans in cancer	http://www.kegg.jp/kegg-bin/show_pathway?bta05205+540168	198	1	0.643244	1.55462	0.47903	1	540168	ENSBTAG00000017551
70	bta04714	Thermogenesis	http://www.kegg.jp/kegg-bin/show_pathway?bta04714+281640	237	1	0.769943	1.2988	0.542682	1	281640	ENSBTAG00000018278
71	bta05203	Viral carcinogenesis	http://www.kegg.jp/kegg-bin/show_pathway?bta05203+519018	241	1	0.782938	1.27724	0.54877	1	519018	ENSBTAG00000013562
72	bta05163	Human cytomegalovirus infection	http://www.kegg.jp/kegg-bin/show_pathway?bta05163+767864	245	1	0.795933	1.25639	0.55478	1	767864	ENSBTAG00000019404
73	bta04080	Neuroactive ligand-receptor interaction	http://www.kegg.jp/kegg-bin/show_pathway?bta04080+281422	302	1	0.981109	1.01925	0.632479	1	281422	ENSBTAG00000025035

## Sheet: Biological Process
	geneSet	description	link	size	overlap	expect	enrichmentRatio	pValue	FDR	overlapId	userId
1	GO:0035637	multicellular organismal signaling	http://amigo.geneontology.org/amigo/term/GO:0035637	64	4	0.269892	14.8207	0.000142514	0.0666967	281495;506738;528014;768025	ENSBTAG00000001150;ENSBTAG00000026260;ENSBTAG00000018854;ENSBTAG00000002458
2	GO:0003012	muscle system process	http://amigo.geneontology.org/amigo/term/GO:0003012	164	5	0.691599	7.22962	0.000580138	0.135752	281495;386587;506738;528014;768025	ENSBTAG00000001150;ENSBTAG00000026260;ENSBTAG00000018854;ENSBTAG00000005176;ENSBTAG00000002458
3	GO:0042391	regulation of membrane potential	http://amigo.geneontology.org/amigo/term/GO:0042391	202	5	0.851848	5.86959	0.00148137	0.161194	280722;281495;506738;528014;768025	ENSBTAG00000001150;ENSBTAG00000026260;ENSBTAG00000018854;ENSBTAG00000017753;ENSBTAG00000002458
4	GO:0003013	circulatory system process	http://amigo.geneontology.org/amigo/term/GO:0003013	207	5	0.872933	5.72782	0.00165061	0.161194	281358;281495;506738;528014;768025	ENSBTAG00000001150;ENSBTAG00000026260;ENSBTAG00000018854;ENSBTAG00000002458;ENSBTAG00000007665
5	GO:0044057	regulation of system process	http://amigo.geneontology.org/amigo/term/GO:0044057	209	5	0.881367	5.673	0.00172216	0.161194	280722;281495;506738;528014;768025	ENSBTAG00000001150;ENSBTAG00000026260;ENSBTAG00000018854;ENSBTAG00000017753;ENSBTAG00000002458
6	GO:0007422	peripheral nervous system development	http://amigo.geneontology.org/amigo/term/GO:0007422	31	2	0.130729	15.2988	0.00745527	0.581511	281495;386587	ENSBTAG00000018854;ENSBTAG00000005176
7	GO:0044770	cell cycle phase transition	http://amigo.geneontology.org/amigo/term/GO:0044770	201	4	0.847631	4.71904	0.00980391	0.655461	280722;512171;519018;531350	ENSBTAG00000004139;ENSBTAG00000000706;ENSBTAG00000017753;ENSBTAG00000013562
8	GO:0070997	neuron death	http://amigo.geneontology.org/amigo/term/GO:0070997	130	3	0.548219	5.47227	0.0171359	0.786863	280722;281495;386587	ENSBTAG00000018854;ENSBTAG00000017753;ENSBTAG00000005176
9	GO:0098657	import into cell	http://amigo.geneontology.org/amigo/term/GO:0098657	362	5	1.52658	3.2753	0.0171729	0.786863	280722;282087;282354;386587;768025	ENSBTAG00000026260;ENSBTAG00000003063;ENSBTAG00000017753;ENSBTAG00000005176;ENSBTAG00000018245
10	GO:0042493	response to drug	http://amigo.geneontology.org/amigo/term/GO:0042493	369	5	1.5561	3.21317	0.0185095	0.786863	281495;282354;386587;537188;768025	ENSBTAG00000026260;ENSBTAG00000018854;ENSBTAG00000005176;ENSBTAG00000018245;ENSBTAG00000002701
11	GO:0008202	steroid metabolic process	http://amigo.geneontology.org/amigo/term/GO:0008202	142	3	0.598824	5.00982	0.0216187	0.786863	280722;281495;540376	ENSBTAG00000018854;ENSBTAG00000017753;ENSBTAG00000021813
12	GO:0050905	neuromuscular process	http://amigo.geneontology.org/amigo/term/GO:0050905	56	2	0.236156	8.46898	0.0231139	0.786863	280722;282354	ENSBTAG00000017753;ENSBTAG00000018245
13	GO:0007610	behavior	http://amigo.geneontology.org/amigo/term/GO:0007610	266	4	1.12174	3.56589	0.0249417	0.786863	280722;281495;282354;539640	ENSBTAG00000020035;ENSBTAG00000018854;ENSBTAG00000017753;ENSBTAG00000018245
14	GO:0001505	regulation of neurotransmitter levels	http://amigo.geneontology.org/amigo/term/GO:0001505	153	3	0.645211	4.64964	0.0262427	0.786863	282354;386587;521553	ENSBTAG00000005176;ENSBTAG00000018245;ENSBTAG00000007690
15	GO:0043269	regulation of ion transport	http://amigo.geneontology.org/amigo/term/GO:0043269	275	4	1.15969	3.44919	0.0277584	0.786863	386587;507243;528014;768025	ENSBTAG00000001753;ENSBTAG00000001150;ENSBTAG00000026260;ENSBTAG00000005176
16	GO:0015672	monovalent inorganic cation transport	http://amigo.geneontology.org/amigo/term/GO:0015672	289	4	1.21873	3.2821	0.0325086	0.786863	281640;282354;528014;768025	ENSBTAG00000001150;ENSBTAG00000026260;ENSBTAG00000018278;ENSBTAG00000018245
17	GO:0044257	cellular protein catabolic process	http://amigo.geneontology.org/amigo/term/GO:0044257	429	5	1.80912	2.76377	0.0328734	0.786863	281495;519018;519992;525276;768025	ENSBTAG00000026260;ENSBTAG00000018854;ENSBTAG00000020122;ENSBTAG00000013562;ENSBTAG00000012558
18	GO:0032787	monocarboxylic acid metabolic process	http://amigo.geneontology.org/amigo/term/GO:0032787	293	4	1.2356	3.23729	0.033949	0.786863	282354;521553;540376;615200	ENSBTAG00000001412;ENSBTAG00000018245;ENSBTAG00000007690;ENSBTAG00000021813
19	GO:0034097	response to cytokine	http://amigo.geneontology.org/amigo/term/GO:0034097	436	5	1.83864	2.7194	0.0349065	0.786863	281422;282257;282258;521554;525276	ENSBTAG00000021819;ENSBTAG00000015212;ENSBTAG00000019975;ENSBTAG00000025035;ENSBTAG00000012558
20	GO:0098660	inorganic ion transmembrane transport	http://amigo.geneontology.org/amigo/term/GO:0098660	442	5	1.86394	2.68248	0.0367109	0.786863	281640;282354;507243;528014;768025	ENSBTAG00000001753;ENSBTAG00000001150;ENSBTAG00000026260;ENSBTAG00000018278;ENSBTAG00000018245
21	GO:0007568	aging	http://amigo.geneontology.org/amigo/term/GO:0007568	73	2	0.307846	6.49676	0.0377226	0.786863	280722;281495	ENSBTAG00000018854;ENSBTAG00000017753
22	GO:0000278	mitotic cell cycle	http://amigo.geneontology.org/amigo/term/GO:0000278	459	5	1.93563	2.58313	0.0421373	0.786863	280722;512171;519018;519992;531350	ENSBTAG00000004139;ENSBTAG00000020122;ENSBTAG00000000706;ENSBTAG00000017753;ENSBTAG00000013562
23	GO:0033002	muscle cell proliferation	http://amigo.geneontology.org/amigo/term/GO:0033002	79	2	0.333148	6.00333	0.0435362	0.786863	512171;514918	ENSBTAG00000003064;ENSBTAG00000000706
24	GO:0006520	cellular amino acid metabolic process	http://amigo.geneontology.org/amigo/term/GO:0006520	188	3	0.792809	3.78401	0.0442142	0.786863	282354;510075;521553	ENSBTAG00000018245;ENSBTAG00000007690;ENSBTAG00000014261
25	GO:0061024	membrane organization	http://amigo.geneontology.org/amigo/term/GO:0061024	320	4	1.34946	2.96414	0.044651	0.786863	281495;386587;506738;531359	ENSBTAG00000018854;ENSBTAG00000005176;ENSBTAG00000002458;ENSBTAG00000032848
26	GO:0006518	peptide metabolic process	http://amigo.geneontology.org/amigo/term/GO:0006518	469	5	1.9778	2.52806	0.0455484	0.786863	280722;281495;510075;519992;615431	ENSBTAG00000012594;ENSBTAG00000018854;ENSBTAG00000020122;ENSBTAG00000017753;ENSBTAG00000014261
27	GO:0010256	endomembrane system organization	http://amigo.geneontology.org/amigo/term/GO:0010256	191	3	0.80546	3.72458	0.0459816	0.786863	281495;506738;531359	ENSBTAG00000018854;ENSBTAG00000002458;ENSBTAG00000032848
28	GO:0032259	methylation	http://amigo.geneontology.org/amigo/term/GO:0032259	194	3	0.818111	3.66698	0.0477841	0.786863	510809;514918;615200	ENSBTAG00000003064;ENSBTAG00000016619;ENSBTAG00000001412
29	GO:0009628	response to abiotic stimulus	http://amigo.geneontology.org/amigo/term/GO:0009628	478	5	2.01576	2.48046	0.0487586	0.786863	280722;281495;282354;518502;531350	ENSBTAG00000018854;ENSBTAG00000004139;ENSBTAG00000017753;ENSBTAG00000018245;ENSBTAG00000019209
30	GO:0032989	cellular component morphogenesis	http://amigo.geneontology.org/amigo/term/GO:0032989	487	5	2.05371	2.43462	0.0521023	0.786922	280722;281495;282354;386587;521554	ENSBTAG00000018854;ENSBTAG00000017753;ENSBTAG00000005176;ENSBTAG00000018245;ENSBTAG00000019975
31	GO:0006979	response to oxidative stress	http://amigo.geneontology.org/amigo/term/GO:0006979	201	3	0.847631	3.53928	0.0521252	0.786922	280722;281495;539640	ENSBTAG00000020035;ENSBTAG00000018854;ENSBTAG00000017753
32	GO:0046677	response to antibiotic	http://amigo.geneontology.org/amigo/term/GO:0046677	96	2	0.404839	4.94024	0.0616411	0.867009	281495;282354	ENSBTAG00000018854;ENSBTAG00000018245
33	GO:0008213	protein alkylation	http://amigo.geneontology.org/amigo/term/GO:0008213	98	2	0.413273	4.83942	0.0639167	0.867009	514918;615200	ENSBTAG00000003064;ENSBTAG00000001412
34	GO:0032409	regulation of transporter activity	http://amigo.geneontology.org/amigo/term/GO:0032409	98	2	0.413273	4.83942	0.0639167	0.867009	528014;768025	ENSBTAG00000001150;ENSBTAG00000026260
35	GO:0034762	regulation of transmembrane transport	http://amigo.geneontology.org/amigo/term/GO:0034762	220	3	0.927755	3.23361	0.0648404	0.867009	507243;528014;768025	ENSBTAG00000001753;ENSBTAG00000001150;ENSBTAG00000026260
36	GO:0010608	posttranscriptional regulation of gene expression	http://amigo.geneontology.org/amigo/term/GO:0010608	230	3	0.969926	3.09302	0.0720624	0.88223	280722;386587;519992	ENSBTAG00000020122;ENSBTAG00000017753;ENSBTAG00000005176
37	GO:1901615	organic hydroxy compound metabolic process	http://amigo.geneontology.org/amigo/term/GO:1901615	242	3	1.02053	2.93965	0.0811905	0.88223	280722;281495;540376	ENSBTAG00000018854;ENSBTAG00000017753;ENSBTAG00000021813
38	GO:0050890	cognition	http://amigo.geneontology.org/amigo/term/GO:0050890	114	2	0.480746	4.1602	0.0830949	0.88223	280722;539640	ENSBTAG00000020035;ENSBTAG00000017753
39	GO:0006325	chromatin organization	http://amigo.geneontology.org/amigo/term/GO:0006325	395	4	1.66574	2.40133	0.0833093	0.88223	510809;514918;519992;540724	ENSBTAG00000003064;ENSBTAG00000016619;ENSBTAG00000020122;ENSBTAG00000033095
40	GO:0042063	gliogenesis	http://amigo.geneontology.org/amigo/term/GO:0042063	115	2	0.484963	4.12403	0.084347	0.88223	280722;281495	ENSBTAG00000018854;ENSBTAG00000017753
41	GO:0031128	developmental induction	http://amigo.geneontology.org/amigo/term/GO:0031128	21	1	0.0885584	11.292	0.0850122	0.88223	386587	ENSBTAG00000005176
42	GO:0042982	amyloid precursor protein metabolic process	http://amigo.geneontology.org/amigo/term/GO:0042982	22	1	0.0927755	10.7787	0.0888798	0.88223	280722	ENSBTAG00000017753
43	GO:0048483	autonomic nervous system development	http://amigo.geneontology.org/amigo/term/GO:0048483	23	1	0.0969926	10.3101	0.0927314	0.88223	386587	ENSBTAG00000005176
44	GO:0006974	cellular response to DNA damage stimulus	http://amigo.geneontology.org/amigo/term/GO:0006974	412	4	1.73743	2.30225	0.0938402	0.88223	518502;519992;531350;540724	ENSBTAG00000004139;ENSBTAG00000020122;ENSBTAG00000033095;ENSBTAG00000019209
45	GO:0072593	reactive oxygen species metabolic process	http://amigo.geneontology.org/amigo/term/GO:0072593	124	2	0.522916	3.8247	0.0958726	0.88223	281495;521553	ENSBTAG00000018854;ENSBTAG00000007690
46	GO:0045103	intermediate filament-based process	http://amigo.geneontology.org/amigo/term/GO:0045103	24	1	0.10121	9.88048	0.0965672	0.88223	281495	ENSBTAG00000018854
47	GO:2001057	reactive nitrogen species metabolic process	http://amigo.geneontology.org/amigo/term/GO:2001057	24	1	0.10121	9.88048	0.0965672	0.88223	521553	ENSBTAG00000007690
48	GO:0008284	positive regulation of cell proliferation	http://amigo.geneontology.org/amigo/term/GO:0008284	418	4	1.76273	2.2692	0.0977054	0.88223	386587;512171;514918;521554	ENSBTAG00000003064;ENSBTAG00000000706;ENSBTAG00000005176;ENSBTAG00000019975
49	GO:0006836	neurotransmitter transport	http://amigo.geneontology.org/amigo/term/GO:0006836	126	2	0.531351	3.76399	0.0984935	0.88223	282354;386587	ENSBTAG00000005176;ENSBTAG00000018245
50	GO:0071985	multivesicular body sorting pathway	http://amigo.geneontology.org/amigo/term/GO:0071985	25	1	0.105427	9.48526	0.100387	0.88223	615627	ENSBTAG00000001258
51	GO:0048666	neuron development	http://amigo.geneontology.org/amigo/term/GO:0048666	426	4	1.79647	2.22659	0.102977	0.88223	280722;281495;282354;386587	ENSBTAG00000018854;ENSBTAG00000017753;ENSBTAG00000005176;ENSBTAG00000018245
52	GO:0106027	neuron projection organization	http://amigo.geneontology.org/amigo/term/GO:0106027	26	1	0.109644	9.12045	0.104192	0.88223	280722	ENSBTAG00000017753
53	GO:0048872	homeostasis of number of cells	http://amigo.geneontology.org/amigo/term/GO:0048872	133	2	0.56087	3.56589	0.107825	0.88223	281495;521554	ENSBTAG00000018854;ENSBTAG00000019975
54	GO:0061383	trabecula morphogenesis	http://amigo.geneontology.org/amigo/term/GO:0061383	28	1	0.118078	8.46898	0.111753	0.88223	512171	ENSBTAG00000000706
55	GO:0071103	DNA conformation change	http://amigo.geneontology.org/amigo/term/GO:0071103	138	2	0.581955	3.43669	0.114633	0.88223	510809;533984	ENSBTAG00000016619;ENSBTAG00000021965
56	GO:0043631	RNA polyadenylation	http://amigo.geneontology.org/amigo/term/GO:0043631	29	1	0.122295	8.17695	0.115511	0.88223	280722	ENSBTAG00000017753
57	GO:0098655	cation transmembrane transport	http://amigo.geneontology.org/amigo/term/GO:0098655	445	4	1.8766	2.13152	0.116022	0.88223	281640;282354;528014;768025	ENSBTAG00000001150;ENSBTAG00000026260;ENSBTAG00000018278;ENSBTAG00000018245
58	GO:0007167	enzyme linked receptor protein signaling pathway	http://amigo.geneontology.org/amigo/term/GO:0007167	449	4	1.89346	2.11253	0.11886	0.88223	280722;281422;525276;533984	ENSBTAG00000017753;ENSBTAG00000025035;ENSBTAG00000012558;ENSBTAG00000021965
59	GO:0007215	glutamate receptor signaling pathway	http://amigo.geneontology.org/amigo/term/GO:0007215	30	1	0.126512	7.90439	0.119253	0.88223	280722	ENSBTAG00000017753
60	GO:0042490	mechanoreceptor differentiation	http://amigo.geneontology.org/amigo/term/GO:0042490	30	1	0.126512	7.90439	0.119253	0.88223	281495	ENSBTAG00000018854
61	GO:0043620	regulation of DNA-templated transcription in response to stress	http://amigo.geneontology.org/amigo/term/GO:0043620	30	1	0.126512	7.90439	0.119253	0.88223	531350	ENSBTAG00000004139
62	GO:0014812	muscle cell migration	http://amigo.geneontology.org/amigo/term/GO:0014812	31	1	0.130729	7.64941	0.122979	0.88223	512171	ENSBTAG00000000706
63	GO:0019748	secondary metabolic process	http://amigo.geneontology.org/amigo/term/GO:0019748	31	1	0.130729	7.64941	0.122979	0.88223	615200	ENSBTAG00000001412
64	GO:0021700	developmental maturation	http://amigo.geneontology.org/amigo/term/GO:0021700	147	2	0.619909	3.22628	0.12716	0.88223	280722;528014	ENSBTAG00000001150;ENSBTAG00000017753
65	GO:0030855	epithelial cell differentiation	http://amigo.geneontology.org/amigo/term/GO:0030855	299	3	1.2609	2.37925	0.130751	0.88223	281495;386587;528014	ENSBTAG00000001150;ENSBTAG00000018854;ENSBTAG00000005176
66	GO:0060548	negative regulation of cell death	http://amigo.geneontology.org/amigo/term/GO:0060548	469	4	1.9778	2.02244	0.133509	0.88223	281495;386587;521554;531359	ENSBTAG00000018854;ENSBTAG00000005176;ENSBTAG00000019975;ENSBTAG00000032848
67	GO:0010564	regulation of cell cycle process	http://amigo.geneontology.org/amigo/term/GO:0010564	305	3	1.28621	2.33244	0.136498	0.88223	280722;512171;518502	ENSBTAG00000000706;ENSBTAG00000017753;ENSBTAG00000019209
68	GO:0043604	amide biosynthetic process	http://amigo.geneontology.org/amigo/term/GO:0043604	473	4	1.99467	2.00534	0.136528	0.88223	280722;510075;519992;615431	ENSBTAG00000012594;ENSBTAG00000020122;ENSBTAG00000017753;ENSBTAG00000014261
69	GO:0050808	synapse organization	http://amigo.geneontology.org/amigo/term/GO:0050808	154	2	0.649428	3.07963	0.137123	0.88223	280722;386587	ENSBTAG00000017753;ENSBTAG00000005176
70	GO:0097581	lamellipodium organization	http://amigo.geneontology.org/amigo/term/GO:0097581	35	1	0.147597	6.77519	0.137733	0.88223	531359	ENSBTAG00000032848
71	GO:0099536	synaptic signaling	http://amigo.geneontology.org/amigo/term/GO:0099536	307	3	1.29464	2.31725	0.138433	0.88223	280722;282354;386587	ENSBTAG00000017753;ENSBTAG00000005176;ENSBTAG00000018245
72	GO:0001655	urogenital system development	http://amigo.geneontology.org/amigo/term/GO:0001655	155	2	0.653646	3.05976	0.138561	0.88223	386587;512171	ENSBTAG00000000706;ENSBTAG00000005176
73	GO:0070661	leukocyte proliferation	http://amigo.geneontology.org/amigo/term/GO:0070661	155	2	0.653646	3.05976	0.138561	0.88223	281358;521554	ENSBTAG00000019975;ENSBTAG00000007665
74	GO:0006259	DNA metabolic process	http://amigo.geneontology.org/amigo/term/GO:0006259	478	4	2.01576	1.98436	0.140342	0.88223	510809;531350;540724;615200	ENSBTAG00000016619;ENSBTAG00000004139;ENSBTAG00000001412;ENSBTAG00000033095
75	GO:0038034	signal transduction in absence of ligand	http://amigo.geneontology.org/amigo/term/GO:0038034	36	1	0.151814	6.58699	0.141383	0.88223	386587	ENSBTAG00000005176
76	GO:0006081	cellular aldehyde metabolic process	http://amigo.geneontology.org/amigo/term/GO:0006081	38	1	0.160249	6.2403	0.148639	0.900379	521553	ENSBTAG00000007690
77	GO:0015837	amine transport	http://amigo.geneontology.org/amigo/term/GO:0015837	38	1	0.160249	6.2403	0.148639	0.900379	386587	ENSBTAG00000005176
78	GO:1902533	positive regulation of intracellular signal transduction	http://amigo.geneontology.org/amigo/term/GO:1902533	491	4	2.07058	1.93183	0.150463	0.900379	280722;281495;521554;531359	ENSBTAG00000018854;ENSBTAG00000017753;ENSBTAG00000019975;ENSBTAG00000032848
79	GO:0021675	nerve development	http://amigo.geneontology.org/amigo/term/GO:0021675	39	1	0.164466	6.0803	0.152244	0.900379	282354	ENSBTAG00000018245
80	GO:0032504	multicellular organism reproduction	http://amigo.geneontology.org/amigo/term/GO:0032504	323	3	1.36211	2.20246	0.154255	0.900379	280722;281495;512171	ENSBTAG00000018854;ENSBTAG00000000706;ENSBTAG00000017753
81	GO:0051341	regulation of oxidoreductase activity	http://amigo.geneontology.org/amigo/term/GO:0051341	40	1	0.168683	5.92829	0.155835	0.900379	386587	ENSBTAG00000005176
82	GO:0015844	monoamine transport	http://amigo.geneontology.org/amigo/term/GO:0015844	41	1	0.1729	5.7837	0.159411	0.905059	386587	ENSBTAG00000005176
83	GO:0050900	leukocyte migration	http://amigo.geneontology.org/amigo/term/GO:0050900	170	2	0.716902	2.78978	0.160513	0.905059	280722;531359	ENSBTAG00000017753;ENSBTAG00000032848
84	GO:0099132	ATP hydrolysis coupled cation transmembrane transport	http://amigo.geneontology.org/amigo/term/GO:0099132	42	1	0.177117	5.64599	0.162972	0.907985	281640	ENSBTAG00000018278
85	GO:0033044	regulation of chromosome organization	http://amigo.geneontology.org/amigo/term/GO:0033044	175	2	0.737987	2.71008	0.167973	0.92484	514918;540724	ENSBTAG00000003064;ENSBTAG00000033095
86	GO:0071887	leukocyte apoptotic process	http://amigo.geneontology.org/amigo/term/GO:0071887	44	1	0.185551	5.38935	0.17005	0.925386	521554	ENSBTAG00000019975
87	GO:0042440	pigment metabolic process	http://amigo.geneontology.org/amigo/term/GO:0042440	45	1	0.189768	5.26959	0.173567	0.933669	281183	ENSBTAG00000009188
88	GO:0008037	cell recognition	http://amigo.geneontology.org/amigo/term/GO:0008037	46	1	0.193985	5.15503	0.177069	0.935772	280722	ENSBTAG00000017753
89	GO:0034248	regulation of cellular amide metabolic process	http://amigo.geneontology.org/amigo/term/GO:0034248	182	2	0.767506	2.60584	0.17852	0.935772	280722;519992	ENSBTAG00000020122;ENSBTAG00000017753
90	GO:0003014	renal system process	http://amigo.geneontology.org/amigo/term/GO:0003014	47	1	0.198202	5.04535	0.180558	0.935772	281358	ENSBTAG00000007665
91	GO:0002252	immune effector process	http://amigo.geneontology.org/amigo/term/GO:0002252	350	3	1.47597	2.03256	0.182195	0.935772	280722;282258;521554	ENSBTAG00000015212;ENSBTAG00000017753;ENSBTAG00000019975
92	GO:0043632	modification-dependent macromolecule catabolic process	http://amigo.geneontology.org/amigo/term/GO:0043632	354	3	1.49284	2.00959	0.186452	0.935772	281495;519018;519992	ENSBTAG00000018854;ENSBTAG00000020122;ENSBTAG00000013562
93	GO:0071166	ribonucleoprotein complex localization	http://amigo.geneontology.org/amigo/term/GO:0071166	49	1	0.206636	4.83942	0.187491	0.935772	506738	ENSBTAG00000002458
94	GO:0045787	positive regulation of cell cycle	http://amigo.geneontology.org/amigo/term/GO:0045787	189	2	0.797026	2.50933	0.189173	0.935772	280722;512171	ENSBTAG00000000706;ENSBTAG00000017753
95	GO:0098876	vesicle-mediated transport to the plasma membrane	http://amigo.geneontology.org/amigo/term/GO:0098876	50	1	0.210853	4.74263	0.190936	0.935772	531359	ENSBTAG00000032848
96	GO:0030029	actin filament-based process	http://amigo.geneontology.org/amigo/term/GO:0030029	364	3	1.53501	1.95438	0.197213	0.935772	506738;528014;768025	ENSBTAG00000001150;ENSBTAG00000026260;ENSBTAG00000002458
97	GO:0009611	response to wounding	http://amigo.geneontology.org/amigo/term/GO:0009611	195	2	0.822328	2.43212	0.198377	0.935772	281495;282354	ENSBTAG00000018854;ENSBTAG00000018245
98	GO:0061458	reproductive system development	http://amigo.geneontology.org/amigo/term/GO:0061458	195	2	0.822328	2.43212	0.198377	0.935772	281495;512171	ENSBTAG00000018854;ENSBTAG00000000706
99	GO:0007272	ensheathment of neurons	http://amigo.geneontology.org/amigo/term/GO:0007272	53	1	0.223505	4.47418	0.201186	0.935772	281495	ENSBTAG00000018854
100	GO:0010035	response to inorganic substance	http://amigo.geneontology.org/amigo/term/GO:0010035	198	2	0.834979	2.39527	0.203002	0.935772	281495;282354	ENSBTAG00000018854;ENSBTAG00000018245

## Sheet: Molecular Function
	geneSet	description	link	size	overlap	expect	enrichmentRatio	pValue	FDR	overlapId	userId
1	GO:0004896	cytokine receptor activity	http://amigo.geneontology.org/amigo/term/GO:0004896	50	4	0.251256	15.92	0.000106589	0.0178003	281422;282257;282258;521554	ENSBTAG00000021819;ENSBTAG00000015212;ENSBTAG00000019975;ENSBTAG00000025035
2	GO:0005539	glycosaminoglycan binding	http://amigo.geneontology.org/amigo/term/GO:0005539	96	4	0.482412	8.29167	0.00130205	0.0874915	280722;286805;512171;516536	ENSBTAG00000017310;ENSBTAG00000000648;ENSBTAG00000000706;ENSBTAG00000017753
3	GO:1901681	sulfur compound binding	http://amigo.geneontology.org/amigo/term/GO:1901681	101	4	0.507538	7.88119	0.0015717	0.0874915	280722;286805;512171;516536	ENSBTAG00000017310;ENSBTAG00000000648;ENSBTAG00000000706;ENSBTAG00000017753
4	GO:0044325	ion channel binding	http://amigo.geneontology.org/amigo/term/GO:0044325	53	2	0.266332	7.50943	0.0288757	1	528014;768025	ENSBTAG00000001150;ENSBTAG00000026260
5	GO:0019955	cytokine binding	http://amigo.geneontology.org/amigo/term/GO:0019955	71	2	0.356784	5.60563	0.0492216	1	281422;282257	ENSBTAG00000021819;ENSBTAG00000025035
6	GO:0008270	zinc ion binding	http://amigo.geneontology.org/amigo/term/GO:0008270	415	5	2.08543	2.39759	0.055197	1	281495;286805;509302;512171;519992	ENSBTAG00000018854;ENSBTAG00000020122;ENSBTAG00000000648;ENSBTAG00000000706;ENSBTAG00000015648
7	GO:0016247	channel regulator activity	http://amigo.geneontology.org/amigo/term/GO:0016247	80	2	0.40201	4.975	0.0608619	1	528014;768025	ENSBTAG00000001150;ENSBTAG00000026260
8	GO:0008233	peptidase activity	http://amigo.geneontology.org/amigo/term/GO:0008233	341	4	1.71357	2.33431	0.0904204	1	286805;512171;519992;525276	ENSBTAG00000020122;ENSBTAG00000000648;ENSBTAG00000000706;ENSBTAG00000012558
9	GO:0015318	inorganic molecular entity transmembrane transporter activity	http://amigo.geneontology.org/amigo/term/GO:0015318	484	5	2.43216	2.05579	0.093046	1	281640;282354;507243;528014;768025	ENSBTAG00000001753;ENSBTAG00000001150;ENSBTAG00000026260;ENSBTAG00000018278;ENSBTAG00000018245
10	GO:0140097	catalytic activity, acting on DNA	http://amigo.geneontology.org/amigo/term/GO:0140097	104	2	0.522613	3.82692	0.0957699	1	533984;615200	ENSBTAG00000001412;ENSBTAG00000021965
11	GO:0016874	ligase activity	http://amigo.geneontology.org/amigo/term/GO:0016874	107	2	0.537688	3.71963	0.100469	1	281183;510075	ENSBTAG00000009188;ENSBTAG00000014261
12	GO:0016769	transferase activity, transferring nitrogenous groups	http://amigo.geneontology.org/amigo/term/GO:0016769	21	1	0.105528	9.47619	0.10051	1	521553	ENSBTAG00000007690
13	GO:0008324	cation transmembrane transporter activity	http://amigo.geneontology.org/amigo/term/GO:0008324	377	4	1.89447	2.11141	0.119208	1	281640;282354;528014;768025	ENSBTAG00000001150;ENSBTAG00000026260;ENSBTAG00000018278;ENSBTAG00000018245
14	GO:0022803	passive transmembrane transporter activity	http://amigo.geneontology.org/amigo/term/GO:0022803	250	3	1.25628	2.388	0.129789	1	507243;528014;768025	ENSBTAG00000001753;ENSBTAG00000001150;ENSBTAG00000026260
15	GO:0140104	molecular carrier activity	http://amigo.geneontology.org/amigo/term/GO:0140104	28	1	0.140704	7.10714	0.13177	1	281495	ENSBTAG00000018854
16	GO:0005326	neurotransmitter transporter activity	http://amigo.geneontology.org/amigo/term/GO:0005326	29	1	0.145729	6.86207	0.136148	1	282354	ENSBTAG00000018245
17	GO:0016741	transferase activity, transferring one-carbon groups	http://amigo.geneontology.org/amigo/term/GO:0016741	131	2	0.658291	3.03817	0.140152	1	281183;615200	ENSBTAG00000009188;ENSBTAG00000001412
18	GO:0005198	structural molecule activity	http://amigo.geneontology.org/amigo/term/GO:0005198	405	4	2.03518	1.96543	0.14408	1	506738;512703;538761;615431	ENSBTAG00000012594;ENSBTAG00000039820;ENSBTAG00000039255;ENSBTAG00000002458
19	GO:0050840	extracellular matrix binding	http://amigo.geneontology.org/amigo/term/GO:0050840	32	1	0.160804	6.21875	0.149155	1	286805	ENSBTAG00000000648
20	GO:0019208	phosphatase regulator activity	http://amigo.geneontology.org/amigo/term/GO:0019208	40	1	0.201005	4.975	0.182912	1	539640	ENSBTAG00000020035
21	GO:0005507	copper ion binding	http://amigo.geneontology.org/amigo/term/GO:0005507	44	1	0.221106	4.52273	0.199297	1	281495	ENSBTAG00000018854
22	GO:0051087	chaperone binding	http://amigo.geneontology.org/amigo/term/GO:0051087	46	1	0.231156	4.32609	0.207369	1	281495	ENSBTAG00000018854
23	GO:0042562	hormone binding	http://amigo.geneontology.org/amigo/term/GO:0042562	49	1	0.246231	4.06122	0.219329	1	281422	ENSBTAG00000025035
24	GO:0019843	rRNA binding	http://amigo.geneontology.org/amigo/term/GO:0019843	52	1	0.261307	3.82692	0.231112	1	615431	ENSBTAG00000012594
25	GO:0016209	antioxidant activity	http://amigo.geneontology.org/amigo/term/GO:0016209	55	1	0.276382	3.61818	0.242722	1	281495	ENSBTAG00000018854
26	GO:0101005	ubiquitinyl hydrolase activity	http://amigo.geneontology.org/amigo/term/GO:0101005	56	1	0.281407	3.55357	0.246554	1	519992	ENSBTAG00000020122
27	GO:0022804	active transmembrane transporter activity	http://amigo.geneontology.org/amigo/term/GO:0022804	191	2	0.959799	2.08377	0.249196	1	281640;282354	ENSBTAG00000018278;ENSBTAG00000018245
28	GO:0008509	anion transmembrane transporter activity	http://amigo.geneontology.org/amigo/term/GO:0008509	193	2	0.969849	2.06218	0.252943	1	282354;507243	ENSBTAG00000001753;ENSBTAG00000018245
29	GO:0032182	ubiquitin-like protein binding	http://amigo.geneontology.org/amigo/term/GO:0032182	59	1	0.296482	3.37288	0.257937	1	519992	ENSBTAG00000020122
30	GO:0015238	drug transmembrane transporter activity	http://amigo.geneontology.org/amigo/term/GO:0015238	62	1	0.311558	3.20968	0.269152	1	282354	ENSBTAG00000018245
31	GO:0003697	single-stranded DNA binding	http://amigo.geneontology.org/amigo/term/GO:0003697	63	1	0.316583	3.15873	0.272853	1	533984	ENSBTAG00000021965
32	GO:0004386	helicase activity	http://amigo.geneontology.org/amigo/term/GO:0004386	73	1	0.366834	2.72603	0.308876	1	533984	ENSBTAG00000021965
33	GO:0019787	ubiquitin-like protein transferase activity	http://amigo.geneontology.org/amigo/term/GO:0019787	224	2	1.12563	1.77679	0.311071	1	281495;519018	ENSBTAG00000018854;ENSBTAG00000013562
34	GO:0019902	phosphatase binding	http://amigo.geneontology.org/amigo/term/GO:0019902	76	1	0.38191	2.61842	0.31934	1	281495	ENSBTAG00000018854
35	GO:0000981	DNA-binding transcription factor activity, RNA polymerase II-specific	http://amigo.geneontology.org/amigo/term/GO:0000981	396	3	1.98995	1.50758	0.320432	1	514918;531350;533984	ENSBTAG00000003064;ENSBTAG00000004139;ENSBTAG00000021965
36	GO:0051082	unfolded protein binding	http://amigo.geneontology.org/amigo/term/GO:0051082	77	1	0.386935	2.58442	0.322793	1	281047	ENSBTAG00000014233
37	GO:0003712	transcription coregulator activity	http://amigo.geneontology.org/amigo/term/GO:0003712	246	2	1.23618	1.61789	0.351914	1	519992;533984	ENSBTAG00000020122;ENSBTAG00000021965
38	GO:0005342	organic acid transmembrane transporter activity	http://amigo.geneontology.org/amigo/term/GO:0005342	90	1	0.452261	2.21111	0.366162	1	282354	ENSBTAG00000018245
39	GO:0019842	vitamin binding	http://amigo.geneontology.org/amigo/term/GO:0019842	97	1	0.487437	2.05155	0.38838	1	521553	ENSBTAG00000007690
40	GO:0001653	peptide receptor activity	http://amigo.geneontology.org/amigo/term/GO:0001653	99	1	0.497487	2.0101	0.394587	1	281358	ENSBTAG00000007665
41	GO:0042393	histone binding	http://amigo.geneontology.org/amigo/term/GO:0042393	99	1	0.497487	2.0101	0.394587	1	519992	ENSBTAG00000020122
42	GO:1990837	sequence-specific double-stranded DNA binding	http://amigo.geneontology.org/amigo/term/GO:1990837	451	3	2.26633	1.32373	0.397189	1	514918;531350;533984	ENSBTAG00000003064;ENSBTAG00000004139;ENSBTAG00000021965
43	GO:0016853	isomerase activity	http://amigo.geneontology.org/amigo/term/GO:0016853	106	1	0.532663	1.87736	0.415833	1	540376	ENSBTAG00000021813
44	GO:0043177	organic acid binding	http://amigo.geneontology.org/amigo/term/GO:0043177	106	1	0.532663	1.87736	0.415833	1	282354	ENSBTAG00000018245
45	GO:0008134	transcription factor binding	http://amigo.geneontology.org/amigo/term/GO:0008134	317	2	1.59296	1.25552	0.477156	1	514918;533984	ENSBTAG00000003064;ENSBTAG00000021965
46	GO:0061134	peptidase regulator activity	http://amigo.geneontology.org/amigo/term/GO:0061134	134	1	0.673367	1.48507	0.493779	1	280722	ENSBTAG00000017753
47	GO:0030545	receptor regulator activity	http://amigo.geneontology.org/amigo/term/GO:0030545	331	2	1.66332	1.20242	0.500222	1	280722;386587	ENSBTAG00000017753;ENSBTAG00000005176
48	GO:0030246	carbohydrate binding	http://amigo.geneontology.org/amigo/term/GO:0030246	137	1	0.688442	1.45255	0.501503	1	516536	ENSBTAG00000017310
49	GO:0001664	G protein-coupled receptor binding	http://amigo.geneontology.org/amigo/term/GO:0001664	154	1	0.773869	1.29221	0.543147	1	507243	ENSBTAG00000001753
50	GO:0005509	calcium ion binding	http://amigo.geneontology.org/amigo/term/GO:0005509	359	2	1.80402	1.10864	0.544453	1	507306;534427	ENSBTAG00000019595;ENSBTAG00000012688
51	GO:0033218	amide binding	http://amigo.geneontology.org/amigo/term/GO:0033218	156	1	0.78392	1.27564	0.547817	1	281422	ENSBTAG00000025035
52	GO:0016757	transferase activity, transferring glycosyl groups	http://amigo.geneontology.org/amigo/term/GO:0016757	162	1	0.81407	1.2284	0.561551	1	537188	ENSBTAG00000002701
53	GO:0004857	enzyme inhibitor activity	http://amigo.geneontology.org/amigo/term/GO:0004857	201	1	1.01005	0.99005	0.641407	1	280722	ENSBTAG00000017753
54	GO:0016788	hydrolase activity, acting on ester bonds	http://amigo.geneontology.org/amigo/term/GO:0016788	432	2	2.17085	0.921296	0.647064	1	282087;518502	ENSBTAG00000003063;ENSBTAG00000019209
55	GO:0042803	protein homodimerization activity	http://amigo.geneontology.org/amigo/term/GO:0042803	440	2	2.21106	0.904545	0.657171	1	281495;386587	ENSBTAG00000018854;ENSBTAG00000005176
56	GO:0008047	enzyme activator activity	http://amigo.geneontology.org/amigo/term/GO:0008047	235	1	1.1809	0.846809	0.699311	1	281495	ENSBTAG00000018854
57	GO:0016887	ATPase activity	http://amigo.geneontology.org/amigo/term/GO:0016887	236	1	1.18593	0.84322	0.700868	1	281640	ENSBTAG00000018278
58	GO:0140098	catalytic activity, acting on RNA	http://amigo.geneontology.org/amigo/term/GO:0140098	238	1	1.19598	0.836134	0.703958	1	510075	ENSBTAG00000014261
59	GO:0001067	regulatory region nucleic acid binding	http://amigo.geneontology.org/amigo/term/GO:0001067	500	2	2.51256	0.796	0.725976	1	514918;531350	ENSBTAG00000003064;ENSBTAG00000004139
60	GO:0019904	protein domain specific binding	http://amigo.geneontology.org/amigo/term/GO:0019904	316	1	1.58794	0.629747	0.802967	1	280722	ENSBTAG00000017753
61	GO:0048037	cofactor binding	http://amigo.geneontology.org/amigo/term/GO:0048037	339	1	1.70352	0.587021	0.825395	1	521553	ENSBTAG00000007690
62	GO:0008289	lipid binding	http://amigo.geneontology.org/amigo/term/GO:0008289	380	1	1.90955	0.523684	0.859361	1	531359	ENSBTAG00000032848

## Sheet: Cellular Component
	geneSet	description	link	size	overlap	expect	enrichmentRatio	pValue	FDR	overlapId	userId
1	GO:0009986	cell surface	http://amigo.geneontology.org/amigo/term/GO:0009986	340	5	1.91195	2.61513	0.0397916	1	280722;281422;282354;521554;768025	ENSBTAG00000026260;ENSBTAG00000017753;ENSBTAG00000018245;ENSBTAG00000019975;ENSBTAG00000025035
2	GO:1990351	transporter complex	http://amigo.geneontology.org/amigo/term/GO:1990351	160	3	0.899743	3.33429	0.0599224	1	507243;528014;768025	ENSBTAG00000001753;ENSBTAG00000001150;ENSBTAG00000026260
3	GO:0031012	extracellular matrix	http://amigo.geneontology.org/amigo/term/GO:0031012	167	3	0.939107	3.19453	0.066416	1	286805;512171;525276	ENSBTAG00000000648;ENSBTAG00000000706;ENSBTAG00000012558
4	GO:0045111	intermediate filament cytoskeleton	http://amigo.geneontology.org/amigo/term/GO:0045111	105	2	0.590456	3.38721	0.117216	1	781604;783607	ENSBTAG00000034869;ENSBTAG00000039602
5	GO:0005581	collagen trimer	http://amigo.geneontology.org/amigo/term/GO:0005581	39	1	0.219312	4.55971	0.197968	1	531659	ENSBTAG00000017071
6	GO:0045177	apical part of cell	http://amigo.geneontology.org/amigo/term/GO:0045177	149	2	0.837886	2.38696	0.203955	1	280722;528014	ENSBTAG00000001150;ENSBTAG00000017753
7	GO:0031594	neuromuscular junction	http://amigo.geneontology.org/amigo/term/GO:0031594	42	1	0.236183	4.23401	0.211509	1	280722	ENSBTAG00000017753
8	GO:0090734	site of DNA damage	http://amigo.geneontology.org/amigo/term/GO:0090734	42	1	0.236183	4.23401	0.211509	1	540724	ENSBTAG00000033095
9	GO:0036477	somatodendritic compartment	http://amigo.geneontology.org/amigo/term/GO:0036477	283	3	1.59142	1.88511	0.211552	1	280722;281495;282354	ENSBTAG00000018854;ENSBTAG00000017753;ENSBTAG00000018245
10	GO:0016469	proton-transporting two-sector ATPase complex	http://amigo.geneontology.org/amigo/term/GO:0016469	46	1	0.258676	3.86584	0.229219	1	281640	ENSBTAG00000018278
11	GO:0044309	neuron spine	http://amigo.geneontology.org/amigo/term/GO:0044309	48	1	0.269923	3.70476	0.237928	1	280722	ENSBTAG00000017753
12	GO:0030054	cell junction	http://amigo.geneontology.org/amigo/term/GO:0030054	451	4	2.53615	1.57719	0.245898	1	280722;512703;534427;538761	ENSBTAG00000039820;ENSBTAG00000039255;ENSBTAG00000017753;ENSBTAG00000019595
13	GO:0044297	cell body	http://amigo.geneontology.org/amigo/term/GO:0044297	170	2	0.955977	2.0921	0.247725	1	281495;282354	ENSBTAG00000018854;ENSBTAG00000018245
14	GO:0031970	organelle envelope lumen	http://amigo.geneontology.org/amigo/term/GO:0031970	53	1	0.29804	3.35526	0.259286	1	280722	ENSBTAG00000017753
15	GO:0043235	receptor complex	http://amigo.geneontology.org/amigo/term/GO:0043235	178	2	1.00096	1.99807	0.264545	1	280722;281422	ENSBTAG00000017753;ENSBTAG00000025035
16	GO:0042579	microbody	http://amigo.geneontology.org/amigo/term/GO:0042579	77	1	0.433001	2.30946	0.353967	1	540376	ENSBTAG00000021813
17	GO:0005635	nuclear envelope	http://amigo.geneontology.org/amigo/term/GO:0005635	223	2	1.25402	1.59488	0.358667	1	280722;506738	ENSBTAG00000017753;ENSBTAG00000002458
18	GO:0098552	side of membrane	http://amigo.geneontology.org/amigo/term/GO:0098552	232	2	1.30463	1.533	0.37712	1	281422;521554	ENSBTAG00000019975;ENSBTAG00000025035
19	GO:0005798	Golgi-associated vesicle	http://amigo.geneontology.org/amigo/term/GO:0005798	84	1	0.472365	2.11701	0.379292	1	280722	ENSBTAG00000017753
20	GO:0098798	mitochondrial protein complex	http://amigo.geneontology.org/amigo/term/GO:0098798	236	2	1.32712	1.50702	0.385259	1	281640;615431	ENSBTAG00000012594;ENSBTAG00000018278
21	GO:0000793	condensed chromosome	http://amigo.geneontology.org/amigo/term/GO:0000793	106	1	0.59608	1.67763	0.452765	1	518502	ENSBTAG00000019209
22	GO:0043209	myelin sheath	http://amigo.geneontology.org/amigo/term/GO:0043209	109	1	0.61295	1.63145	0.462105	1	281640	ENSBTAG00000018278
23	GO:0030135	coated vesicle	http://amigo.geneontology.org/amigo/term/GO:0030135	111	1	0.624197	1.60206	0.468245	1	280722	ENSBTAG00000017753
24	GO:0098797	plasma membrane protein complex	http://amigo.geneontology.org/amigo/term/GO:0098797	287	2	1.61391	1.23922	0.484736	1	528014;768025	ENSBTAG00000001150;ENSBTAG00000026260
25	GO:0005929	cilium	http://amigo.geneontology.org/amigo/term/GO:0005929	296	2	1.66452	1.20154	0.501322	1	280722;281047	ENSBTAG00000014233;ENSBTAG00000017753
26	GO:0005730	nucleolus	http://amigo.geneontology.org/amigo/term/GO:0005730	491	3	2.76109	1.08653	0.529251	1	509302;518501;533984	ENSBTAG00000015648;ENSBTAG00000019211;ENSBTAG00000021965
27	GO:0098589	membrane region	http://amigo.geneontology.org/amigo/term/GO:0098589	138	1	0.776028	1.28861	0.544763	1	280722	ENSBTAG00000017753
28	GO:0098687	chromosomal region	http://amigo.geneontology.org/amigo/term/GO:0098687	171	1	0.9616	1.03993	0.62385	1	510809	ENSBTAG00000016619
29	GO:0044431	Golgi apparatus part	http://amigo.geneontology.org/amigo/term/GO:0044431	376	2	2.1144	0.945897	0.633709	1	531359;615627	ENSBTAG00000001258;ENSBTAG00000032848
30	GO:0019866	organelle inner membrane	http://amigo.geneontology.org/amigo/term/GO:0019866	379	2	2.13127	0.938409	0.638127	1	281640;615431	ENSBTAG00000012594;ENSBTAG00000018278
31	GO:0044445	cytosolic part	http://amigo.geneontology.org/amigo/term/GO:0044445	184	1	1.0347	0.96646	0.651191	1	281047	ENSBTAG00000014233
32	GO:0005819	spindle	http://amigo.geneontology.org/amigo/term/GO:0005819	186	1	1.04595	0.956068	0.655222	1	280722	ENSBTAG00000017753
33	GO:0044456	synapse part	http://amigo.geneontology.org/amigo/term/GO:0044456	391	2	2.19875	0.909609	0.6554	1	280722;282087	ENSBTAG00000003063;ENSBTAG00000017753
34	GO:0005667	transcription factor complex	http://amigo.geneontology.org/amigo/term/GO:0005667	192	1	1.07969	0.92619	0.667046	1	533984	ENSBTAG00000021965
35	GO:0005840	ribosome	http://amigo.geneontology.org/amigo/term/GO:0005840	197	1	1.10781	0.902683	0.676597	1	615431	ENSBTAG00000012594
36	GO:0099080	supramolecular complex	http://amigo.geneontology.org/amigo/term/GO:0099080	418	2	2.35058	0.850854	0.69196	1	781604;783607	ENSBTAG00000034869;ENSBTAG00000039602
37	GO:0005768	endosome	http://amigo.geneontology.org/amigo/term/GO:0005768	426	2	2.39557	0.834876	0.702189	1	280722;282257	ENSBTAG00000021819;ENSBTAG00000017753
38	GO:0099568	cytoplasmic region	http://amigo.geneontology.org/amigo/term/GO:0099568	216	1	1.21465	0.82328	0.710523	1	281495	ENSBTAG00000018854
39	GO:0030424	axon	http://amigo.geneontology.org/amigo/term/GO:0030424	229	1	1.28776	0.776544	0.731716	1	280722	ENSBTAG00000017753
40	GO:0015629	actin cytoskeleton	http://amigo.geneontology.org/amigo/term/GO:0015629	230	1	1.29338	0.773168	0.733283	1	510075	ENSBTAG00000014261
41	GO:0005759	mitochondrial matrix	http://amigo.geneontology.org/amigo/term/GO:0005759	245	1	1.37773	0.725831	0.755738	1	615431	ENSBTAG00000012594
42	GO:0098590	plasma membrane region	http://amigo.geneontology.org/amigo/term/GO:0098590	474	2	2.66549	0.750332	0.75799	1	528014;538761	ENSBTAG00000001150;ENSBTAG00000039820
43	GO:0005740	mitochondrial envelope	http://amigo.geneontology.org/amigo/term/GO:0005740	490	2	2.75546	0.725831	0.774559	1	281640;615431	ENSBTAG00000012594;ENSBTAG00000018278
44	GO:1990234	transferase complex	http://amigo.geneontology.org/amigo/term/GO:1990234	493	2	2.77233	0.721414	0.777557	1	519018;615200	ENSBTAG00000001412;ENSBTAG00000013562
45	GO:0005773	vacuole	http://amigo.geneontology.org/amigo/term/GO:0005773	288	1	1.61954	0.61746	0.810404	1	282257	ENSBTAG00000021819
46	GO:0048471	perinuclear region of cytoplasm	http://amigo.geneontology.org/amigo/term/GO:0048471	300	1	1.68702	0.592762	0.823404	1	280722	ENSBTAG00000017753
47	GO:0000228	nuclear chromosome	http://amigo.geneontology.org/amigo/term/GO:0000228	302	1	1.69826	0.588836	0.825485	1	518502	ENSBTAG00000019209
48	GO:0000785	chromatin	http://amigo.geneontology.org/amigo/term/GO:0000785	304	1	1.70951	0.584962	0.827542	1	510809	ENSBTAG00000016619
49	GO:0005815	microtubule organizing center	http://amigo.geneontology.org/amigo/term/GO:0005815	371	1	2.08628	0.479322	0.884343	1	281047	ENSBTAG00000014233
50	GO:0098827	endoplasmic reticulum subcompartment	http://amigo.geneontology.org/amigo/term/GO:0098827	471	1	2.64862	0.377555	0.936838	1	615627	ENSBTAG00000001258
51	GO:0042175	nuclear outer membrane-endoplasmic reticulum membrane network	http://amigo.geneontology.org/amigo/term/GO:0042175	476	1	2.67674	0.373589	0.938737	1	615627	ENSBTAG00000001258
