# Supplementary material for: Characterization of Runs of Homozygosity, Heterozygosity-Enriched Regions, and Population Structure in Cattle Populations Selected for Different Breeding Goals
Source: Research Square preprint supplement (doi:10.21203/rs.3.rs-785546/v1), 2021-08-23
Supplement: Supplementary file 3 [file 9c576218008616f1b9397853.xlsx]

## Sheet: Ensembl gene id
Jersey - results Homozygosity Island
	group	CHR	BP1	BP2	chr	start_pos	end_pos	width	strand	gene_id	gene_name	gene_biotype
1	JER	6	100066570	110600517	6	100718857	100887281	168425	+	ENSBTAG00000003959	ARHGAP24	protein_coding
2	JER	6	100066570	110600517	6	100907869	101279063	371195	-	ENSBTAG00000020048	MAPK10	protein_coding
3	JER	6	100066570	110600517	6	101408371	101408646	276	-	ENSBTAG00000045839	#N/A	protein_coding
4	JER	6	100066570	110600517	6	101448339	101448875	537	+	ENSBTAG00000050276	#N/A	protein_coding
5	JER	6	100066570	110600517	6	101531746	101735421	203676	+	ENSBTAG00000014947	PTPN13	protein_coding
6	JER	6	100066570	110600517	6	101731536	101747428	15893	-	ENSBTAG00000047514	#N/A	protein_coding
7	JER	6	100066570	110600517	6	101735134	101736816	1683	-	ENSBTAG00000050963	#N/A	protein_coding
8	JER	6	100066570	110600517	6	101781455	101787723	6269	-	ENSBTAG00000051915	#N/A	protein_coding
9	JER	6	100066570	110600517	6	101835188	101835294	107	-	ENSBTAG00000055128	U6	snRNA
10	JER	6	100066570	110600517	6	101852659	102045732	193074	+	ENSBTAG00000018488	AFF1	protein_coding
11	JER	6	100066570	110600517	6	102017883	102017942	60	+	ENSBTAG00000051450	bta-mir-2284ab	miRNA
12	JER	6	100066570	110600517	6	102066192	102119154	52963	-	ENSBTAG00000002455	KLHL8	protein_coding
13	JER	6	100066570	110600517	6	102152418	102152828	411	-	ENSBTAG00000047432	#N/A	protein_coding
14	JER	6	100066570	110600517	6	102160939	102161042	104	-	ENSBTAG00000042291	U6	snRNA
15	JER	6	100066570	110600517	6	102164825	102164931	107	-	ENSBTAG00000053669	U6	snRNA
16	JER	6	100066570	110600517	6	102192504	102212283	19780	-	ENSBTAG00000031679	HSD17B13	protein_coding
17	JER	6	100066570	110600517	6	102227496	102276940	49445	-	ENSBTAG00000006307	HSD17B11	protein_coding
18	JER	6	100066570	110600517	6	102244501	102245949	1449	+	ENSBTAG00000052418	#N/A	protein_coding
19	JER	6	100066570	110600517	6	102320394	102357766	37373	+	ENSBTAG00000011354	NUDT9	protein_coding
20	JER	6	100066570	110600517	6	102370630	102423199	52570	-	ENSBTAG00000004094	SPARCL1	protein_coding
21	JER	6	100066570	110600517	6	102435182	102448262	13081	-	ENSBTAG00000053494	#N/A	lncRNA
22	JER	6	100066570	110600517	6	102494936	102500867	5932	+	ENSBTAG00000045714	DSPP	protein_coding
23	JER	6	100066570	110600517	6	102526308	102543087	16780	+	ENSBTAG00000019132	DMP1	protein_coding
24	JER	6	100066570	110600517	6	102563753	102603522	39770	-	ENSBTAG00000017829	#N/A	protein_coding
25	JER	6	100066570	110600517	6	102631400	102676599	45200	+	ENSBTAG00000006508	#N/A	protein_coding
26	JER	6	100066570	110600517	6	102716789	102881084	164296	+	ENSBTAG00000020598	PPP2R2C	protein_coding
27	JER	6	100066570	110600517	6	102896904	102928920	32017	-	ENSBTAG00000046671	WFS1	protein_coding
28	JER	6	100066570	110600517	6	102954780	102960723	5944	-	ENSBTAG00000048770	#N/A	lncRNA
29	JER	6	100066570	110600517	6	102967554	102982615	15062	-	ENSBTAG00000054994	#N/A	protein_coding
30	JER	6	100066570	110600517	6	103013174	103169423	156250	+	ENSBTAG00000011170	JAKMIP1	protein_coding
31	JER	6	100066570	110600517	6	103176664	103206055	29392	+	ENSBTAG00000053771	#N/A	lncRNA
32	JER	6	100066570	110600517	6	103215398	103240042	24645	+	ENSBTAG00000021729	#N/A	protein_coding
33	JER	6	100066570	110600517	6	103283408	103310737	27330	+	ENSBTAG00000049457	#N/A	lncRNA
34	JER	6	100066570	110600517	6	103327385	103388983	61599	+	ENSBTAG00000004292	CRMP1	protein_coding
35	JER	6	100066570	110600517	6	103394278	103497766	103489	-	ENSBTAG00000004287	EVC	protein_coding
36	JER	6	100066570	110600517	6	103500611	103662790	162180	+	ENSBTAG00000004277	EVC2	protein_coding
37	JER	6	100066570	110600517	6	103607166	103607267	102	+	ENSBTAG00000042343	U6	snRNA
38	JER	6	100066570	110600517	6	103708310	104113056	404747	-	ENSBTAG00000015409	STK32B	protein_coding
39	JER	6	100066570	110600517	6	104131746	104131864	119	-	ENSBTAG00000036649	5S_rRNA	rRNA
40	JER	6	100066570	110600517	6	104144869	104151818	6950	+	ENSBTAG00000011163	CYTL1	protein_coding
41	JER	6	100066570	110600517	6	104281506	104285802	4297	-	ENSBTAG00000010875	MSX1	protein_coding
42	JER	6	100066570	110600517	6	104334503	104334622	120	-	ENSBTAG00000043863	5S_rRNA	rRNA
43	JER	6	100066570	110600517	6	104587343	104705746	118404	+	ENSBTAG00000005712	STX18	protein_coding
44	JER	6	100066570	110600517	6	104678391	104679560	1170	-	ENSBTAG00000050796	#N/A	protein_coding
45	JER	6	100066570	110600517	6	104705029	104738615	33587	-	ENSBTAG00000005711	NSG1	protein_coding
46	JER	6	100066570	110600517	6	104792359	104819002	26644	-	ENSBTAG00000014680	ZBTB49	protein_coding
47	JER	6	100066570	110600517	6	104819025	104839735	20711	+	ENSBTAG00000003653	LYAR	protein_coding
48	JER	6	100066570	110600517	6	104853328	104868645	15318	+	ENSBTAG00000003652	TMEM128	protein_coding
49	JER	6	100066570	110600517	6	104881314	104932641	51328	+	ENSBTAG00000003651	OTOP1	protein_coding
50	JER	6	100066570	110600517	6	104959375	104961361	1987	+	ENSBTAG00000038606	DRD5	protein_coding
51	JER	6	100066570	110600517	6	104996577	105216475	219899	-	ENSBTAG00000039197	SLC2A9	protein_coding
52	JER	6	100066570	110600517	6	105290863	105332843	41981	-	ENSBTAG00000013607	WDR1	protein_coding
53	JER	6	100066570	110600517	6	105484771	105488007	3237	-	ENSBTAG00000050234	ZNF518B	protein_coding
54	JER	6	100066570	110600517	6	105829090	105862463	33374	+	ENSBTAG00000048936	#N/A	lncRNA
55	JER	6	100066570	110600517	6	106504062	106540229	36168	-	ENSBTAG00000007449	HS3ST1	protein_coding
56	JER	6	100066570	110600517	6	107614964	107615071	108	+	ENSBTAG00000044477	U6	snRNA
57	JER	6	100066570	110600517	6	108599906	108697973	98068	-	ENSBTAG00000003218	RAB28	protein_coding
58	JER	6	100066570	110600517	6	108753570	108757070	3501	-	ENSBTAG00000010896	NKX3-2	protein_coding
59	JER	6	100066570	110600517	6	108778999	108831026	52028	-	ENSBTAG00000004316	BOD1L1	protein_coding
60	JER	6	100066570	110600517	6	109029040	109029225	186	-	ENSBTAG00000050349	#N/A	protein_coding
61	JER	6	100066570	110600517	6	110152224	110215989	63766	+	ENSBTAG00000019847	CPEB2	protein_coding
62	JER	6	100066570	110600517	6	110457785	110586506	128722	+	ENSBTAG00000010343	C1QTNF7	protein_coding

## Sheet: TOP100
	geneSet	description	link	size	overlap	expect	enrichmentRatio	pValue	FDR	overlapId	userId
1	bta04340	Hedgehog signaling pathway	http://www.kegg.jp/kegg-bin/show_pathway?bta04340+280834+282874	47	2	0.0678619	29.4716	0.00199279	0.643672	280834;282874	ENSBTAG00000004287;ENSBTAG00000004277
2	bta04728	Dopaminergic synapse	http://www.kegg.jp/kegg-bin/show_pathway?bta04728+526221+537631	132	2	0.190591	10.4937	0.0148886	1	526221;537631	ENSBTAG00000020048;ENSBTAG00000038606
3	bta04210	Apoptosis	http://www.kegg.jp/kegg-bin/show_pathway?bta04210+282333+537631	142	2	0.205029	9.75469	0.0171015	1	282333;537631	ENSBTAG00000020048;ENSBTAG00000014947
4	bta04141	Protein processing in endoplasmic reticulum	http://www.kegg.jp/kegg-bin/show_pathway?bta04141+100298456+537631	165	2	0.238238	8.39495	0.022691	1	100298456;537631	ENSBTAG00000020048;ENSBTAG00000046671
5	bta00511	Other glycan degradation	http://www.kegg.jp/kegg-bin/show_pathway?bta00511+523503	22	1	0.0317651	31.4811	0.0313272	1	523503	ENSBTAG00000006508
6	bta00534	Glycosaminoglycan biosynthesis	http://www.kegg.jp/kegg-bin/show_pathway?bta00534+538691	24	1	0.0346529	28.8576	0.03413	1	538691	ENSBTAG00000007449
7	bta04024	cAMP signaling pathway	http://www.kegg.jp/kegg-bin/show_pathway?bta04024+526221+537631	212	2	0.3061	6.53381	0.0361247	1	526221;537631	ENSBTAG00000020048;ENSBTAG00000038606
8	bta04130	SNARE interactions in vesicular transport	http://www.kegg.jp/kegg-bin/show_pathway?bta04130+614135	34	1	0.0490916	20.3701	0.048033	1	614135	ENSBTAG00000005712
9	bta04215	Apoptosis	http://www.kegg.jp/kegg-bin/show_pathway?bta04215+537631	34	1	0.0490916	20.3701	0.048033	1	537631	ENSBTAG00000020048
10	bta04930	Type II diabetes mellitus	http://www.kegg.jp/kegg-bin/show_pathway?bta04930+537631	46	1	0.066418	15.0562	0.0644744	1	537631	ENSBTAG00000020048
11	bta04137	Mitophagy	http://www.kegg.jp/kegg-bin/show_pathway?bta04137+537631	66	1	0.0952954	10.4937	0.0912992	1	537631	ENSBTAG00000020048
12	bta04664	Fc epsilon RI signaling pathway	http://www.kegg.jp/kegg-bin/show_pathway?bta04664+537631	70	1	0.101071	9.89405	0.0965788	1	537631	ENSBTAG00000020048
13	bta04920	Adipocytokine signaling pathway	http://www.kegg.jp/kegg-bin/show_pathway?bta04920+537631	72	1	0.103959	9.61921	0.0992081	1	537631	ENSBTAG00000020048
14	bta05212	Pancreatic cancer	http://www.kegg.jp/kegg-bin/show_pathway?bta05212+537631	74	1	0.106846	9.35923	0.10183	1	537631	ENSBTAG00000020048
15	bta05133	Pertussis	http://www.kegg.jp/kegg-bin/show_pathway?bta05133+537631	77	1	0.111178	8.99459	0.105751	1	537631	ENSBTAG00000020048
16	bta04917	Prolactin signaling pathway	http://www.kegg.jp/kegg-bin/show_pathway?bta04917+537631	82	1	0.118397	8.44614	0.112249	1	537631	ENSBTAG00000020048
17	bta04012	ErbB signaling pathway	http://www.kegg.jp/kegg-bin/show_pathway?bta04012+537631	85	1	0.122729	8.14804	0.116128	1	537631	ENSBTAG00000020048
18	bta05132	Salmonella infection	http://www.kegg.jp/kegg-bin/show_pathway?bta05132+537631	85	1	0.122729	8.14804	0.116128	1	537631	ENSBTAG00000020048
19	bta04914	Progesterone-mediated oocyte maturation	http://www.kegg.jp/kegg-bin/show_pathway?bta04914+537631	88	1	0.127061	7.87027	0.119991	1	537631	ENSBTAG00000020048
20	bta05210	Colorectal cancer	http://www.kegg.jp/kegg-bin/show_pathway?bta05210+537631	89	1	0.128504	7.78184	0.121275	1	537631	ENSBTAG00000020048
21	bta04657	IL-17 signaling pathway	http://www.kegg.jp/kegg-bin/show_pathway?bta04657+537631	91	1	0.131392	7.61081	0.123838	1	537631	ENSBTAG00000020048
22	bta04912	GnRH signaling pathway	http://www.kegg.jp/kegg-bin/show_pathway?bta04912+537631	93	1	0.13428	7.44713	0.126395	1	537631	ENSBTAG00000020048
23	bta01522	Endocrine resistance	http://www.kegg.jp/kegg-bin/show_pathway?bta01522+537631	94	1	0.135724	7.36791	0.12767	1	537631	ENSBTAG00000020048
24	bta04658	Th1 and Th2 cell differentiation	http://www.kegg.jp/kegg-bin/show_pathway?bta04658+537631	97	1	0.140055	7.14003	0.131487	1	537631	ENSBTAG00000020048
25	bta05231	Choline metabolism in cancer	http://www.kegg.jp/kegg-bin/show_pathway?bta05231+537631	100	1	0.144387	6.92583	0.135289	1	537631	ENSBTAG00000020048
26	bta04622	RIG-I-like receptor signaling pathway	http://www.kegg.jp/kegg-bin/show_pathway?bta04622+537631	102	1	0.147275	6.79003	0.137814	1	537631	ENSBTAG00000020048
27	bta04750	Inflammatory mediator regulation of TRP channels	http://www.kegg.jp/kegg-bin/show_pathway?bta04750+537631	102	1	0.147275	6.79003	0.137814	1	537631	ENSBTAG00000020048
28	bta04933	AGE-RAGE signaling pathway in diabetic complications	http://www.kegg.jp/kegg-bin/show_pathway?bta04933+537631	102	1	0.147275	6.79003	0.137814	1	537631	ENSBTAG00000020048
29	bta04625	C-type lectin receptor signaling pathway	http://www.kegg.jp/kegg-bin/show_pathway?bta04625+537631	105	1	0.151606	6.59603	0.14159	1	537631	ENSBTAG00000020048
30	bta04931	Insulin resistance	http://www.kegg.jp/kegg-bin/show_pathway?bta04931+537631	109	1	0.157382	6.35398	0.146601	1	537631	ENSBTAG00000020048
31	bta04620	Toll-like receptor signaling pathway	http://www.kegg.jp/kegg-bin/show_pathway?bta04620+537631	110	1	0.158826	6.29621	0.14785	1	537631	ENSBTAG00000020048
32	bta04659	Th17 cell differentiation	http://www.kegg.jp/kegg-bin/show_pathway?bta04659+537631	112	1	0.161713	6.18378	0.150342	1	537631	ENSBTAG00000020048
33	bta05145	Toxoplasmosis	http://www.kegg.jp/kegg-bin/show_pathway?bta05145+537631	113	1	0.163157	6.12906	0.151586	1	537631	ENSBTAG00000020048
34	bta05142	Chagas disease (American trypanosomiasis)	http://www.kegg.jp/kegg-bin/show_pathway?bta05142+537631	114	1	0.164601	6.07529	0.152828	1	537631	ENSBTAG00000020048
35	bta04668	TNF signaling pathway	http://www.kegg.jp/kegg-bin/show_pathway?bta04668+537631	115	1	0.166045	6.02246	0.154068	1	537631	ENSBTAG00000020048
36	bta04071	Sphingolipid signaling pathway	http://www.kegg.jp/kegg-bin/show_pathway?bta04071+537631	119	1	0.17182	5.82003	0.159012	1	537631	ENSBTAG00000020048
37	bta04722	Neurotrophin signaling pathway	http://www.kegg.jp/kegg-bin/show_pathway?bta04722+537631	122	1	0.176152	5.67691	0.162703	1	537631	ENSBTAG00000020048
38	bta04068	FoxO signaling pathway	http://www.kegg.jp/kegg-bin/show_pathway?bta04068+537631	132	1	0.190591	5.24684	0.174898	1	537631	ENSBTAG00000020048
39	bta04926	Relaxin signaling pathway	http://www.kegg.jp/kegg-bin/show_pathway?bta04926+537631	132	1	0.190591	5.24684	0.174898	1	537631	ENSBTAG00000020048
40	bta04140	Autophagy	http://www.kegg.jp/kegg-bin/show_pathway?bta04140+537631	133	1	0.192035	5.20739	0.176109	1	537631	ENSBTAG00000020048
41	bta04380	Osteoclast differentiation	http://www.kegg.jp/kegg-bin/show_pathway?bta04380+537631	133	1	0.192035	5.20739	0.176109	1	537631	ENSBTAG00000020048
42	bta04910	Insulin signaling pathway	http://www.kegg.jp/kegg-bin/show_pathway?bta04910+537631	137	1	0.19781	5.05535	0.180935	1	537631	ENSBTAG00000020048
43	bta05160	Hepatitis C	http://www.kegg.jp/kegg-bin/show_pathway?bta05160+537631	139	1	0.200698	4.98261	0.183338	1	537631	ENSBTAG00000020048
44	bta05418	Fluid shear stress and atherosclerosis	http://www.kegg.jp/kegg-bin/show_pathway?bta05418+537631	145	1	0.209361	4.77644	0.190509	1	537631	ENSBTAG00000020048
45	bta04310	Wnt signaling pathway	http://www.kegg.jp/kegg-bin/show_pathway?bta04310+537631	147	1	0.212249	4.71145	0.192887	1	537631	ENSBTAG00000020048
46	bta04723	Retrograde endocannabinoid signaling	http://www.kegg.jp/kegg-bin/show_pathway?bta04723+537631	152	1	0.219468	4.55647	0.198803	1	537631	ENSBTAG00000020048
47	bta05161	Hepatitis B	http://www.kegg.jp/kegg-bin/show_pathway?bta05161+537631	152	1	0.219468	4.55647	0.198803	1	537631	ENSBTAG00000020048
48	bta04932	Non-alcoholic fatty liver disease (NAFLD)	http://www.kegg.jp/kegg-bin/show_pathway?bta04932+537631	158	1	0.228131	4.38344	0.205849	1	537631	ENSBTAG00000020048
49	bta04145	Phagosome	http://www.kegg.jp/kegg-bin/show_pathway?bta04145+614135	170	1	0.245458	4.07402	0.219772	1	614135	ENSBTAG00000005712
50	bta04621	NOD-like receptor signaling pathway	http://www.kegg.jp/kegg-bin/show_pathway?bta04621+537631	176	1	0.254121	3.93513	0.226649	1	537631	ENSBTAG00000020048
51	bta00230	Purine metabolism	http://www.kegg.jp/kegg-bin/show_pathway?bta00230+517589	177	1	0.255565	3.9129	0.22779	1	517589	ENSBTAG00000011354
52	bta04217	Necroptosis	http://www.kegg.jp/kegg-bin/show_pathway?bta04217+537631	177	1	0.255565	3.9129	0.22779	1	537631	ENSBTAG00000020048
53	bta04530	Tight junction	http://www.kegg.jp/kegg-bin/show_pathway?bta04530+537631	178	1	0.257009	3.89092	0.228929	1	537631	ENSBTAG00000020048
54	bta05164	Influenza A	http://www.kegg.jp/kegg-bin/show_pathway?bta05164+537631	180	1	0.259897	3.84769	0.231203	1	537631	ENSBTAG00000020048
55	bta05202	Transcriptional misregulation in cancer	http://www.kegg.jp/kegg-bin/show_pathway?bta05202+781149	187	1	0.270004	3.70365	0.239113	1	781149	ENSBTAG00000018488
56	bta04020	Calcium signaling pathway	http://www.kegg.jp/kegg-bin/show_pathway?bta04020+526221	192	1	0.277223	3.6072	0.244717	1	526221	ENSBTAG00000038606
57	bta05152	Tuberculosis	http://www.kegg.jp/kegg-bin/show_pathway?bta05152+537631	197	1	0.284442	3.51565	0.250284	1	537631	ENSBTAG00000020048
58	bta04510	Focal adhesion	http://www.kegg.jp/kegg-bin/show_pathway?bta04510+537631	198	1	0.285886	3.4979	0.251393	1	537631	ENSBTAG00000020048
59	bta05168	Herpes simplex infection	http://www.kegg.jp/kegg-bin/show_pathway?bta05168+537631	198	1	0.285886	3.4979	0.251393	1	537631	ENSBTAG00000020048
60	bta05167	Kaposi sarcoma-associated herpesvirus infection	http://www.kegg.jp/kegg-bin/show_pathway?bta05167+537631	206	1	0.297437	3.36206	0.260209	1	537631	ENSBTAG00000020048
61	bta05169	Epstein-Barr virus infection	http://www.kegg.jp/kegg-bin/show_pathway?bta05169+537631	227	1	0.327758	3.05103	0.282901	1	537631	ENSBTAG00000020048
62	bta05170	Human immunodeficiency virus 1 infection	http://www.kegg.jp/kegg-bin/show_pathway?bta05170+537631	233	1	0.336422	2.97246	0.289266	1	537631	ENSBTAG00000020048
63	bta04014	Ras signaling pathway	http://www.kegg.jp/kegg-bin/show_pathway?bta04014+537631	241	1	0.347973	2.87379	0.297672	1	537631	ENSBTAG00000020048
64	bta05166	Human T-cell leukemia virus 1 infection	http://www.kegg.jp/kegg-bin/show_pathway?bta05166+286872	268	1	0.386957	2.58427	0.325375	1	286872	ENSBTAG00000010875
65	bta04010	MAPK signaling pathway	http://www.kegg.jp/kegg-bin/show_pathway?bta04010+537631	292	1	0.42161	2.37186	0.349155	1	537631	ENSBTAG00000020048
66	bta04080	Neuroactive ligand-receptor interaction	http://www.kegg.jp/kegg-bin/show_pathway?bta04080+526221	302	1	0.436049	2.29332	0.358835	1	526221	ENSBTAG00000038606

## Sheet: Biological Process 
	geneSet	description	link	size	overlap	expect	enrichmentRatio	pValue	FDR	overlapId	userId
1	GO:0007212	dopamine receptor signaling pathway	http://amigo.geneontology.org/amigo/term/GO:0007212	23	2	0.0433914	46.0921	0.000828072	0.387538	523110;526221	ENSBTAG00000005711;ENSBTAG00000038606
2	GO:0061448	connective tissue development	http://amigo.geneontology.org/amigo/term/GO:0061448	138	2	0.260348	7.68201	0.0272461	1	505170;616907	ENSBTAG00000011163;ENSBTAG00000010896
3	GO:0006984	ER-nucleus signaling pathway	http://amigo.geneontology.org/amigo/term/GO:0006984	20	1	0.0377317	26.5029	0.0371014	1	100298456	ENSBTAG00000046671
4	GO:0042982	amyloid precursor protein metabolic process	http://amigo.geneontology.org/amigo/term/GO:0042982	22	1	0.0415048	24.0936	0.0407395	1	523110	ENSBTAG00000005711
5	GO:0099072	regulation of postsynaptic membrane neurotransmitter receptor levels	http://amigo.geneontology.org/amigo/term/GO:0099072	24	1	0.045278	22.0858	0.0443645	1	523110	ENSBTAG00000005711
6	GO:0000122	negative regulation of transcription by RNA polymerase II	http://amigo.geneontology.org/amigo/term/GO:0000122	435	3	0.820664	3.65558	0.0458927	1	537667;616907;100298456	ENSBTAG00000046671;ENSBTAG00000003653;ENSBTAG00000010896
7	GO:0051090	regulation of DNA-binding transcription factor activity	http://amigo.geneontology.org/amigo/term/GO:0051090	209	2	0.394296	5.07233	0.0579471	1	505170;100298456	ENSBTAG00000046671;ENSBTAG00000011163
8	GO:0030104	water homeostasis	http://amigo.geneontology.org/amigo/term/GO:0030104	32	1	0.0603707	16.5643	0.0587363	1	100298456	ENSBTAG00000046671
9	GO:0048871	multicellular organismal homeostasis	http://amigo.geneontology.org/amigo/term/GO:0048871	228	2	0.430141	4.64964	0.0675685	1	505170;100298456	ENSBTAG00000046671;ENSBTAG00000011163
10	GO:1904019	epithelial cell apoptotic process	http://amigo.geneontology.org/amigo/term/GO:1904019	38	1	0.0716902	13.9489	0.0693814	1	100298456	ENSBTAG00000046671
11	GO:0051341	regulation of oxidoreductase activity	http://amigo.geneontology.org/amigo/term/GO:0051341	40	1	0.0754633	13.2515	0.0729045	1	526221	ENSBTAG00000038606
12	GO:0031016	pancreas development	http://amigo.geneontology.org/amigo/term/GO:0031016	41	1	0.0773499	12.9283	0.0746613	1	616907	ENSBTAG00000010896
13	GO:0090066	regulation of anatomical structure size	http://amigo.geneontology.org/amigo/term/GO:0090066	242	2	0.456553	4.38065	0.0749832	1	526221;533223	ENSBTAG00000038606;ENSBTAG00000013607
14	GO:0001501	skeletal system development	http://amigo.geneontology.org/amigo/term/GO:0001501	246	2	0.464099	4.30942	0.0771496	1	505170;616907	ENSBTAG00000011163;ENSBTAG00000010896
15	GO:0050886	endocrine process	http://amigo.geneontology.org/amigo/term/GO:0050886	45	1	0.0848962	11.7791	0.0816574	1	526221	ENSBTAG00000038606
16	GO:0003014	renal system process	http://amigo.geneontology.org/amigo/term/GO:0003014	47	1	0.0886694	11.2778	0.0851368	1	100298456	ENSBTAG00000046671
17	GO:0007423	sensory organ development	http://amigo.geneontology.org/amigo/term/GO:0007423	264	2	0.498058	4.0156	0.087147	1	505170;616907	ENSBTAG00000011163;ENSBTAG00000010896
18	GO:1901361	organic cyclic compound catabolic process	http://amigo.geneontology.org/amigo/term/GO:1901361	267	2	0.503718	3.97048	0.0888512	1	517589;527592	ENSBTAG00000006307;ENSBTAG00000011354
19	GO:0098876	vesicle-mediated transport to the plasma membrane	http://amigo.geneontology.org/amigo/term/GO:0098876	50	1	0.0943292	10.6012	0.0903325	1	523110	ENSBTAG00000005711
20	GO:0051668	localization within membrane	http://amigo.geneontology.org/amigo/term/GO:0051668	56	1	0.105649	9.46534	0.100641	1	523110	ENSBTAG00000005711
21	GO:0055123	digestive system development	http://amigo.geneontology.org/amigo/term/GO:0055123	61	1	0.115082	8.68949	0.109147	1	616907	ENSBTAG00000010896
22	GO:0007224	smoothened signaling pathway	http://amigo.geneontology.org/amigo/term/GO:0007224	64	1	0.120741	8.28217	0.114214	1	280834	ENSBTAG00000004277
23	GO:0035637	multicellular organismal signaling	http://amigo.geneontology.org/amigo/term/GO:0035637	64	1	0.120741	8.28217	0.114214	1	526221	ENSBTAG00000038606
24	GO:0009410	response to xenobiotic stimulus	http://amigo.geneontology.org/amigo/term/GO:0009410	70	1	0.132061	7.57227	0.124268	1	526221	ENSBTAG00000038606
25	GO:1901136	carbohydrate derivative catabolic process	http://amigo.geneontology.org/amigo/term/GO:1901136	79	1	0.14904	6.70961	0.139146	1	517589	ENSBTAG00000011354
26	GO:0035966	response to topologically incorrect protein	http://amigo.geneontology.org/amigo/term/GO:0035966	80	1	0.150927	6.62574	0.140785	1	100298456	ENSBTAG00000046671
27	GO:0043632	modification-dependent macromolecule catabolic process	http://amigo.geneontology.org/amigo/term/GO:0043632	354	2	0.66785	2.99468	0.142217	1	532960;100298456	ENSBTAG00000002455;ENSBTAG00000046671
28	GO:0043112	receptor metabolic process	http://amigo.geneontology.org/amigo/term/GO:0043112	98	1	0.184885	5.40876	0.16978	1	523110	ENSBTAG00000005711
29	GO:0099003	vesicle-mediated transport in synapse	http://amigo.geneontology.org/amigo/term/GO:0099003	100	1	0.188658	5.30059	0.172944	1	523110	ENSBTAG00000005711
30	GO:0051050	positive regulation of transport	http://amigo.geneontology.org/amigo/term/GO:0051050	403	2	0.760293	2.63056	0.17486	1	537667;100298456	ENSBTAG00000046671;ENSBTAG00000003653
31	GO:0046434	organophosphate catabolic process	http://amigo.geneontology.org/amigo/term/GO:0046434	102	1	0.192431	5.19666	0.176097	1	517589	ENSBTAG00000011354
32	GO:0033500	carbohydrate homeostasis	http://amigo.geneontology.org/amigo/term/GO:0033500	104	1	0.196205	5.09672	0.179238	1	100298456	ENSBTAG00000046671
33	GO:1901698	response to nitrogen compound	http://amigo.geneontology.org/amigo/term/GO:1901698	413	2	0.779159	2.56687	0.181686	1	526221;100298456	ENSBTAG00000046671;ENSBTAG00000038606
34	GO:0016197	endosomal transport	http://amigo.geneontology.org/amigo/term/GO:0016197	110	1	0.207524	4.81872	0.188595	1	523110	ENSBTAG00000005711
35	GO:0031503	protein-containing complex localization	http://amigo.geneontology.org/amigo/term/GO:0031503	111	1	0.209411	4.7753	0.190145	1	523110	ENSBTAG00000005711
36	GO:0044257	cellular protein catabolic process	http://amigo.geneontology.org/amigo/term/GO:0044257	429	2	0.809344	2.47114	0.192703	1	532960;100298456	ENSBTAG00000002455;ENSBTAG00000046671
37	GO:0050890	cognition	http://amigo.geneontology.org/amigo/term/GO:0050890	114	1	0.21507	4.64964	0.194777	1	526221	ENSBTAG00000038606
38	GO:0032446	protein modification by small protein conjugation	http://amigo.geneontology.org/amigo/term/GO:0032446	436	2	0.82255	2.43146	0.197556	1	532960;100298456	ENSBTAG00000002455;ENSBTAG00000046671
39	GO:0051093	negative regulation of developmental process	http://amigo.geneontology.org/amigo/term/GO:0051093	444	2	0.837643	2.38765	0.203125	1	504250;616907	ENSBTAG00000004292;ENSBTAG00000010896
40	GO:0007187	G protein-coupled receptor signaling pathway, coupled to cyclic nucleotide second messenger	http://amigo.geneontology.org/amigo/term/GO:0007187	124	1	0.233936	4.27467	0.210039	1	526221	ENSBTAG00000038606
41	GO:0072593	reactive oxygen species metabolic process	http://amigo.geneontology.org/amigo/term/GO:0072593	124	1	0.233936	4.27467	0.210039	1	526221	ENSBTAG00000038606
42	GO:0002520	immune system development	http://amigo.geneontology.org/amigo/term/GO:0002520	463	2	0.873488	2.28967	0.216439	1	537667;616907	ENSBTAG00000003653;ENSBTAG00000010896
43	GO:0070997	neuron death	http://amigo.geneontology.org/amigo/term/GO:0070997	130	1	0.245256	4.07738	0.219065	1	100298456	ENSBTAG00000046671
44	GO:0060548	negative regulation of cell death	http://amigo.geneontology.org/amigo/term/GO:0060548	469	2	0.884807	2.26038	0.220666	1	616907;100298456	ENSBTAG00000046671;ENSBTAG00000010896
45	GO:0031098	stress-activated protein kinase signaling cascade	http://amigo.geneontology.org/amigo/term/GO:0031098	133	1	0.250916	3.9854	0.223541	1	537631	ENSBTAG00000020048
46	GO:0048872	homeostasis of number of cells	http://amigo.geneontology.org/amigo/term/GO:0048872	133	1	0.250916	3.9854	0.223541	1	537667	ENSBTAG00000003653
47	GO:1903320	regulation of protein modification by small protein conjugation or removal	http://amigo.geneontology.org/amigo/term/GO:1903320	134	1	0.252802	3.95566	0.225028	1	100298456	ENSBTAG00000046671
48	GO:0032989	cellular component morphogenesis	http://amigo.geneontology.org/amigo/term/GO:0032989	487	2	0.918766	2.17683	0.233401	1	504250;533223	ENSBTAG00000004292;ENSBTAG00000013607
49	GO:0008202	steroid metabolic process	http://amigo.geneontology.org/amigo/term/GO:0008202	142	1	0.267895	3.73281	0.236827	1	527592	ENSBTAG00000006307
50	GO:0034976	response to endoplasmic reticulum stress	http://amigo.geneontology.org/amigo/term/GO:0034976	144	1	0.271668	3.68096	0.23975	1	100298456	ENSBTAG00000046671
51	GO:0031647	regulation of protein stability	http://amigo.geneontology.org/amigo/term/GO:0031647	146	1	0.275441	3.63054	0.242662	1	100298456	ENSBTAG00000046671
52	GO:1990778	protein localization to cell periphery	http://amigo.geneontology.org/amigo/term/GO:1990778	148	1	0.279214	3.58148	0.245564	1	523110	ENSBTAG00000005711
53	GO:0050808	synapse organization	http://amigo.geneontology.org/amigo/term/GO:0050808	154	1	0.290534	3.44194	0.254207	1	507537	ENSBTAG00000004094
54	GO:0001655	urogenital system development	http://amigo.geneontology.org/amigo/term/GO:0001655	155	1	0.29242	3.41973	0.255639	1	100298456	ENSBTAG00000046671
55	GO:0050878	regulation of body fluid levels	http://amigo.geneontology.org/amigo/term/GO:0050878	155	1	0.29242	3.41973	0.255639	1	100298456	ENSBTAG00000046671
56	GO:0019216	regulation of lipid metabolic process	http://amigo.geneontology.org/amigo/term/GO:0019216	163	1	0.307513	3.25189	0.266998	1	618192	ENSBTAG00000031679
57	GO:0016042	lipid catabolic process	http://amigo.geneontology.org/amigo/term/GO:0016042	174	1	0.328265	3.04632	0.28235	1	527592	ENSBTAG00000006307
58	GO:0009636	response to toxic substance	http://amigo.geneontology.org/amigo/term/GO:0009636	176	1	0.332039	3.0117	0.285109	1	526221	ENSBTAG00000038606
59	GO:0051098	regulation of binding	http://amigo.geneontology.org/amigo/term/GO:0051098	176	1	0.332039	3.0117	0.285109	1	504250	ENSBTAG00000004292
60	GO:0060249	anatomical structure homeostasis	http://amigo.geneontology.org/amigo/term/GO:0060249	177	1	0.333925	2.99468	0.286485	1	505170	ENSBTAG00000011163
61	GO:0022411	cellular component disassembly	http://amigo.geneontology.org/amigo/term/GO:0022411	186	1	0.350904	2.84978	0.298753	1	533223	ENSBTAG00000013607
62	GO:0009611	response to wounding	http://amigo.geneontology.org/amigo/term/GO:0009611	195	1	0.367884	2.71825	0.310823	1	526221	ENSBTAG00000038606
63	GO:0043087	regulation of GTPase activity	http://amigo.geneontology.org/amigo/term/GO:0043087	203	1	0.382976	2.61113	0.321387	1	539902	ENSBTAG00000003959
64	GO:0019932	second-messenger-mediated signaling	http://amigo.geneontology.org/amigo/term/GO:0019932	205	1	0.38675	2.58565	0.324004	1	526221	ENSBTAG00000038606
65	GO:0009100	glycoprotein metabolic process	http://amigo.geneontology.org/amigo/term/GO:0009100	206	1	0.388636	2.5731	0.325309	1	505170	ENSBTAG00000011163
66	GO:0003013	circulatory system process	http://amigo.geneontology.org/amigo/term/GO:0003013	207	1	0.390523	2.56067	0.326612	1	526221	ENSBTAG00000038606
67	GO:0048568	embryonic organ development	http://amigo.geneontology.org/amigo/term/GO:0048568	218	1	0.411275	2.43146	0.340786	1	616907	ENSBTAG00000010896
68	GO:0010817	regulation of hormone levels	http://amigo.geneontology.org/amigo/term/GO:0010817	222	1	0.418821	2.38765	0.34587	1	527592	ENSBTAG00000006307
69	GO:0072511	divalent inorganic cation transport	http://amigo.geneontology.org/amigo/term/GO:0072511	224	1	0.422595	2.36633	0.348398	1	100298456	ENSBTAG00000046671
70	GO:0060627	regulation of vesicle-mediated transport	http://amigo.geneontology.org/amigo/term/GO:0060627	225	1	0.424481	2.35582	0.349658	1	537667	ENSBTAG00000003653
71	GO:0007389	pattern specification process	http://amigo.geneontology.org/amigo/term/GO:0007389	228	1	0.430141	2.32482	0.353427	1	616907	ENSBTAG00000010896
72	GO:0007264	small GTPase mediated signal transduction	http://amigo.geneontology.org/amigo/term/GO:0007264	238	1	0.449007	2.22714	0.365839	1	536021	ENSBTAG00000003218
73	GO:0044270	cellular nitrogen compound catabolic process	http://amigo.geneontology.org/amigo/term/GO:0044270	244	1	0.460326	2.17237	0.373179	1	517589	ENSBTAG00000011354
74	GO:0046700	heterocycle catabolic process	http://amigo.geneontology.org/amigo/term/GO:0046700	245	1	0.462213	2.16351	0.374394	1	517589	ENSBTAG00000011354
75	GO:0031344	regulation of cell projection organization	http://amigo.geneontology.org/amigo/term/GO:0031344	249	1	0.469759	2.12875	0.379234	1	504250	ENSBTAG00000004292
76	GO:0072657	protein localization to membrane	http://amigo.geneontology.org/amigo/term/GO:0072657	249	1	0.469759	2.12875	0.379234	1	523110	ENSBTAG00000005711
77	GO:0019439	aromatic compound catabolic process	http://amigo.geneontology.org/amigo/term/GO:0019439	253	1	0.477306	2.09509	0.384038	1	517589	ENSBTAG00000011354
78	GO:0051493	regulation of cytoskeleton organization	http://amigo.geneontology.org/amigo/term/GO:0051493	256	1	0.482965	2.07054	0.387619	1	533223	ENSBTAG00000013607
79	GO:1902532	negative regulation of intracellular signal transduction	http://amigo.geneontology.org/amigo/term/GO:1902532	263	1	0.496171	2.01543	0.395897	1	100298456	ENSBTAG00000046671
80	GO:0007610	behavior	http://amigo.geneontology.org/amigo/term/GO:0007610	266	1	0.501831	1.9927	0.399412	1	526221	ENSBTAG00000038606
81	GO:0043269	regulation of ion transport	http://amigo.geneontology.org/amigo/term/GO:0043269	275	1	0.51881	1.92749	0.409843	1	100298456	ENSBTAG00000046671
82	GO:0061061	muscle structure development	http://amigo.geneontology.org/amigo/term/GO:0061061	288	1	0.543336	1.84048	0.42461	1	533223	ENSBTAG00000013607
83	GO:0022613	ribonucleoprotein complex biogenesis	http://amigo.geneontology.org/amigo/term/GO:0022613	289	1	0.545223	1.83411	0.425731	1	537667	ENSBTAG00000003653
84	GO:0042330	taxis	http://amigo.geneontology.org/amigo/term/GO:0042330	290	1	0.547109	1.82779	0.426851	1	504250	ENSBTAG00000004292
85	GO:0019693	ribose phosphate metabolic process	http://amigo.geneontology.org/amigo/term/GO:0019693	296	1	0.558429	1.79074	0.433523	1	517589	ENSBTAG00000011354
86	GO:0010638	positive regulation of organelle organization	http://amigo.geneontology.org/amigo/term/GO:0010638	298	1	0.562202	1.77872	0.435731	1	533223	ENSBTAG00000013607
87	GO:0030855	epithelial cell differentiation	http://amigo.geneontology.org/amigo/term/GO:0030855	299	1	0.564088	1.77277	0.436832	1	616907	ENSBTAG00000010896
88	GO:0034660	ncRNA metabolic process	http://amigo.geneontology.org/amigo/term/GO:0034660	302	1	0.569748	1.75516	0.440123	1	537667	ENSBTAG00000003653
89	GO:0048598	embryonic morphogenesis	http://amigo.geneontology.org/amigo/term/GO:0048598	306	1	0.577294	1.73222	0.444483	1	616907	ENSBTAG00000010896
90	GO:0099536	synaptic signaling	http://amigo.geneontology.org/amigo/term/GO:0099536	307	1	0.579181	1.72658	0.445567	1	526221	ENSBTAG00000038606
91	GO:0072521	purine-containing compound metabolic process	http://amigo.geneontology.org/amigo/term/GO:0072521	315	1	0.594274	1.68273	0.454175	1	517589	ENSBTAG00000011354
92	GO:0080135	regulation of cellular response to stress	http://amigo.geneontology.org/amigo/term/GO:0080135	318	1	0.599933	1.66685	0.45737	1	100298456	ENSBTAG00000046671
93	GO:0061024	membrane organization	http://amigo.geneontology.org/amigo/term/GO:0061024	320	1	0.603707	1.65643	0.459491	1	523110	ENSBTAG00000005711
94	GO:0008610	lipid biosynthetic process	http://amigo.geneontology.org/amigo/term/GO:0008610	321	1	0.605593	1.65127	0.460548	1	618192	ENSBTAG00000031679
95	GO:0032504	multicellular organism reproduction	http://amigo.geneontology.org/amigo/term/GO:0032504	323	1	0.609366	1.64105	0.462657	1	526221	ENSBTAG00000038606
96	GO:0014070	response to organic cyclic compound	http://amigo.geneontology.org/amigo/term/GO:0014070	324	1	0.611253	1.63598	0.463708	1	526221	ENSBTAG00000038606
97	GO:0097190	apoptotic signaling pathway	http://amigo.geneontology.org/amigo/term/GO:0097190	326	1	0.615026	1.62595	0.465805	1	100298456	ENSBTAG00000046671
98	GO:0098609	cell-cell adhesion	http://amigo.geneontology.org/amigo/term/GO:0098609	330	1	0.622572	1.60624	0.469976	1	507537	ENSBTAG00000004094
99	GO:0051345	positive regulation of hydrolase activity	http://amigo.geneontology.org/amigo/term/GO:0051345	332	1	0.626346	1.59656	0.47205	1	539902	ENSBTAG00000003959
100	GO:0051129	negative regulation of cellular component organization	http://amigo.geneontology.org/amigo/term/GO:0051129	336	1	0.633892	1.57756	0.476175	1	504250	ENSBTAG00000004292

## Sheet: Molecular Function
	geneSet	description	link	size	overlap	expect	enrichmentRatio	pValue	FDR	overlapId	userId
1	GO:0016229	steroid dehydrogenase activity	http://amigo.geneontology.org/amigo/term/GO:0016229	23	2	0.0404523	49.441	0.000711624	0.118841	527592;618192	ENSBTAG00000031679;ENSBTAG00000006307
2	GO:0008092	cytoskeletal protein binding	http://amigo.geneontology.org/amigo/term/GO:0008092	465	3	0.817839	3.6682	0.0445322	1	504250;533223;540970	ENSBTAG00000011170;ENSBTAG00000004292;ENSBTAG00000013607
3	GO:0030276	clathrin binding	http://amigo.geneontology.org/amigo/term/GO:0030276	31	1	0.0545226	18.341	0.0532061	1	523110	ENSBTAG00000005711
4	GO:0005518	collagen binding	http://amigo.geneontology.org/amigo/term/GO:0005518	32	1	0.0562814	17.7679	0.0548778	1	507537	ENSBTAG00000004094
5	GO:0050840	extracellular matrix binding	http://amigo.geneontology.org/amigo/term/GO:0050840	32	1	0.0562814	17.7679	0.0548778	1	507537	ENSBTAG00000004094
6	GO:0051117	ATPase binding	http://amigo.geneontology.org/amigo/term/GO:0051117	37	1	0.0650754	15.3668	0.0631954	1	100298456	ENSBTAG00000046671
7	GO:0016782	transferase activity, transferring sulfur-containing groups	http://amigo.geneontology.org/amigo/term/GO:0016782	51	1	0.0896985	11.1485	0.0861245	1	538691	ENSBTAG00000007449
8	GO:0070405	ammonium ion binding	http://amigo.geneontology.org/amigo/term/GO:0070405	52	1	0.0914573	10.9341	0.0877421	1	526221	ENSBTAG00000038606
9	GO:0030594	neurotransmitter receptor activity	http://amigo.geneontology.org/amigo/term/GO:0030594	55	1	0.0967337	10.3377	0.0925792	1	526221	ENSBTAG00000038606
10	GO:0016810	hydrolase activity, acting on carbon-nitrogen (but not peptide) bonds	http://amigo.geneontology.org/amigo/term/GO:0016810	76	1	0.133668	7.4812	0.125778	1	504250	ENSBTAG00000004292
11	GO:0060589	nucleoside-triphosphatase regulator activity	http://amigo.geneontology.org/amigo/term/GO:0060589	146	1	0.256784	3.89432	0.228472	1	539902	ENSBTAG00000003959
12	GO:0044389	ubiquitin-like protein ligase binding	http://amigo.geneontology.org/amigo/term/GO:0044389	174	1	0.30603	3.26765	0.266319	1	100298456	ENSBTAG00000046671
13	GO:0003924	GTPase activity	http://amigo.geneontology.org/amigo/term/GO:0003924	220	1	0.386935	2.58442	0.324774	1	536021	ENSBTAG00000003218
14	GO:0008047	enzyme activator activity	http://amigo.geneontology.org/amigo/term/GO:0008047	235	1	0.413317	2.41945	0.34288	1	539902	ENSBTAG00000003959
15	GO:0001882	nucleoside binding	http://amigo.geneontology.org/amigo/term/GO:0001882	276	1	0.485427	2.06004	0.390096	1	536021	ENSBTAG00000003218
16	GO:0019001	guanyl nucleotide binding	http://amigo.geneontology.org/amigo/term/GO:0019001	281	1	0.494221	2.02339	0.395633	1	536021	ENSBTAG00000003218
17	GO:0019900	kinase binding	http://amigo.geneontology.org/amigo/term/GO:0019900	320	1	0.562814	1.77679	0.43725	1	540970	ENSBTAG00000011170
18	GO:0005509	calcium ion binding	http://amigo.geneontology.org/amigo/term/GO:0005509	359	1	0.631407	1.58376	0.476192	1	507537	ENSBTAG00000004094
19	GO:0016773	phosphotransferase activity, alcohol group as acceptor	http://amigo.geneontology.org/amigo/term/GO:0016773	377	1	0.663065	1.50815	0.493307	1	537631	ENSBTAG00000020048
20	GO:0000981	DNA-binding transcription factor activity, RNA polymerase II-specific	http://amigo.geneontology.org/amigo/term/GO:0000981	396	1	0.696482	1.43579	0.510809	1	616907	ENSBTAG00000010896
21	GO:0016301	kinase activity	http://amigo.geneontology.org/amigo/term/GO:0016301	428	1	0.752764	1.32844	0.539023	1	537631	ENSBTAG00000020048
22	GO:1990837	sequence-specific double-stranded DNA binding	http://amigo.geneontology.org/amigo/term/GO:1990837	451	1	0.793216	1.26069	0.55836	1	616907	ENSBTAG00000010896
23	GO:0001067	regulatory region nucleic acid binding	http://amigo.geneontology.org/amigo/term/GO:0001067	500	1	0.879397	1.13714	0.597072	1	616907	ENSBTAG00000010896

## Sheet: Cellular Component
	geneSet	description	link	size	overlap	expect	enrichmentRatio	pValue	FDR	overlapId	userId
1	GO:0005929	cilium	http://amigo.geneontology.org/amigo/term/GO:0005929	296	4	0.66581	6.00772	0.00343419	0.299117	280834;526221;536021;537667	ENSBTAG00000004277;ENSBTAG00000003653;ENSBTAG00000038606;ENSBTAG00000003218
2	GO:0005811	lipid droplet	http://amigo.geneontology.org/amigo/term/GO:0005811	49	2	0.110219	18.1458	0.00520203	0.299117	527592;618192	ENSBTAG00000031679;ENSBTAG00000006307
3	GO:0098978	glutamatergic synapse	http://amigo.geneontology.org/amigo/term/GO:0098978	122	2	0.274422	7.28806	0.0297334	1	507537;523110	ENSBTAG00000004094;ENSBTAG00000005711
4	GO:0016328	lateral plasma membrane	http://amigo.geneontology.org/amigo/term/GO:0016328	29	1	0.0652314	15.33	0.0633563	1	523110	ENSBTAG00000005711
5	GO:0005581	collagen trimer	http://amigo.geneontology.org/amigo/term/GO:0005581	39	1	0.0877249	11.3993	0.0843245	1	540131	ENSBTAG00000010343
6	GO:0098590	plasma membrane region	http://amigo.geneontology.org/amigo/term/GO:0098590	474	3	1.0662	2.81374	0.0851585	1	280834;523110;526221	ENSBTAG00000004277;ENSBTAG00000005711;ENSBTAG00000038606
7	GO:0098862	cluster of actin-based cell projections	http://amigo.geneontology.org/amigo/term/GO:0098862	58	1	0.130463	7.66502	0.122968	1	526221	ENSBTAG00000038606
8	GO:0030496	midbody	http://amigo.geneontology.org/amigo/term/GO:0030496	99	1	0.222686	4.49062	0.201255	1	504250	ENSBTAG00000004292
9	GO:0005815	microtubule organizing center	http://amigo.geneontology.org/amigo/term/GO:0005815	371	2	0.834512	2.39661	0.20156	1	504250;536021	ENSBTAG00000004292;ENSBTAG00000003218
10	GO:0099080	supramolecular complex	http://amigo.geneontology.org/amigo/term/GO:0099080	418	2	0.940231	2.12714	0.241278	1	533223;540970	ENSBTAG00000011170;ENSBTAG00000013607
11	GO:0031012	extracellular matrix	http://amigo.geneontology.org/amigo/term/GO:0031012	167	1	0.375643	2.6621	0.316944	1	507537	ENSBTAG00000004094
12	GO:0099568	cytoplasmic region	http://amigo.geneontology.org/amigo/term/GO:0099568	216	1	0.485861	2.0582	0.39044	1	533223	ENSBTAG00000013607
13	GO:0015629	actin cytoskeleton	http://amigo.geneontology.org/amigo/term/GO:0015629	230	1	0.517352	1.93292	0.410049	1	533223	ENSBTAG00000013607
14	GO:0044456	synapse part	http://amigo.geneontology.org/amigo/term/GO:0044456	391	1	0.879499	1.13701	0.597202	1	523110	ENSBTAG00000005711
15	GO:0005768	endosome	http://amigo.geneontology.org/amigo/term/GO:0005768	426	1	0.958226	1.04359	0.629785	1	523110	ENSBTAG00000005711
16	GO:0030054	cell junction	http://amigo.geneontology.org/amigo/term/GO:0030054	451	1	1.01446	0.985746	0.651542	1	533223	ENSBTAG00000013607
17	GO:0098827	endoplasmic reticulum subcompartment	http://amigo.geneontology.org/amigo/term/GO:0098827	471	1	1.05945	0.943888	0.668085	1	100298456	ENSBTAG00000046671
18	GO:0042175	nuclear outer membrane-endoplasmic reticulum membrane network	http://amigo.geneontology.org/amigo/term/GO:0042175	476	1	1.07069	0.933974	0.672106	1	100298456	ENSBTAG00000046671
19	GO:0005730	nucleolus	http://amigo.geneontology.org/amigo/term/GO:0005730	491	1	1.10443	0.905441	0.683897	1	537667	ENSBTAG00000003653
20	GO:1990234	transferase complex	http://amigo.geneontology.org/amigo/term/GO:1990234	493	1	1.10893	0.901768	0.685439	1	532960	ENSBTAG00000002455
