# Supplementary material for: Characterization of Runs of Homozygosity, Heterozygosity-Enriched Regions, and Population Structure in Cattle Populations Selected for Different Breeding Goals
Source: Research Square preprint supplement (doi:10.21203/rs.3.rs-785546/v1), 2021-08-23
Supplement: Supplementary file 4 [file c9b4733da1b56f3a7690b0aa.xlsx]

## Sheet: Ensembl gene id
Angus x Simmental - results Homozygosity Island
	group	CHR	BP1	BP2	chr	start_pos	end_pos	width	strand	gene_id	gene_name	gene_biotype
1	ANGxSIM	16	62578656	66253552	16	62415671	62941402	525732	+	ENSBTAG00000020887	CACNA1E	protein_coding
2	ANGxSIM	16	62578656	66253552	16	63169575	63171269	1695	-	ENSBTAG00000046243	ZNF648	protein_coding
3	ANGxSIM	16	62578656	66253552	16	63334919	63335137	219	-	ENSBTAG00000052482	#N/A	protein_coding
4	ANGxSIM	16	62578656	66253552	16	63365483	63366634	1152	-	ENSBTAG00000027426	#N/A	protein_coding
5	ANGxSIM	16	62578656	66253552	16	63415985	63419770	3786	-	ENSBTAG00000053265	#N/A	lncRNA
6	ANGxSIM	16	62578656	66253552	16	63468038	63478788	10751	-	ENSBTAG00000013631	GLUL	protein_coding
7	ANGxSIM	16	62578656	66253552	16	63482537	63486614	4078	-	ENSBTAG00000021432	TEDDM1	protein_coding
8	ANGxSIM	16	62578656	66253552	16	63533641	63536686	3046	+	ENSBTAG00000000772	#N/A	protein_coding
9	ANGxSIM	16	62578656	66253552	16	63544117	63602942	58826	+	ENSBTAG00000018220	RGSL1	protein_coding
10	ANGxSIM	16	62578656	66253552	16	63614243	63633749	19507	-	ENSBTAG00000009091	RNASEL	protein_coding
11	ANGxSIM	16	62578656	66253552	16	63646670	63652245	5576	-	ENSBTAG00000004305	RGS16	protein_coding
12	ANGxSIM	16	62578656	66253552	16	63701887	63732216	30330	-	ENSBTAG00000026481	RGS8	protein_coding
13	ANGxSIM	16	62578656	66253552	16	63847538	63886366	38829	+	ENSBTAG00000002266	NPL	protein_coding
14	ANGxSIM	16	62578656	66253552	16	63896685	63937888	41204	+	ENSBTAG00000019821	DHX9	protein_coding
15	ANGxSIM	16	62578656	66253552	16	63941657	63985594	43938	-	ENSBTAG00000031238	SHCBP1L	protein_coding
16	ANGxSIM	16	62578656	66253552	16	64062643	64183738	121096	+	ENSBTAG00000011966	LAMC1	protein_coding
17	ANGxSIM	16	62578656	66253552	16	64223528	64289609	66082	+	ENSBTAG00000000793	LAMC2	protein_coding
18	ANGxSIM	16	62578656	66253552	16	64294454	64294687	234	-	ENSBTAG00000049987	#N/A	protein_coding
19	ANGxSIM	16	62578656	66253552	16	64296837	64514197	217361	-	ENSBTAG00000000795	NMNAT2	protein_coding
20	ANGxSIM	16	62578656	66253552	16	64485072	64485200	129	-	ENSBTAG00000028988	5S_rRNA	rRNA
21	ANGxSIM	16	62578656	66253552	16	64518478	64604657	86180	+	ENSBTAG00000008003	SMG7	protein_coding
22	ANGxSIM	16	62578656	66253552	16	64606142	64652347	46206	-	ENSBTAG00000008004	NCF2	protein_coding
23	ANGxSIM	16	62578656	66253552	16	64674639	64684247	9609	-	ENSBTAG00000045582	ARPC5	protein_coding
24	ANGxSIM	16	62578656	66253552	16	64696290	64697393	1104	-	ENSBTAG00000047395	APOBEC4	protein_coding
25	ANGxSIM	16	62578656	66253552	16	64794721	64961884	167164	+	ENSBTAG00000019630	RGL1	protein_coding
26	ANGxSIM	16	62578656	66253552	16	64894638	64894740	103	-	ENSBTAG00000042393	U6	snRNA
27	ANGxSIM	16	62578656	66253552	16	64972038	65091021	118984	-	ENSBTAG00000035836	COLGALT2	protein_coding
28	ANGxSIM	16	62578656	66253552	16	65100661	65130514	29854	+	ENSBTAG00000016369	TSEN15	protein_coding
29	ANGxSIM	16	62578656	66253552	16	65415033	65415142	110	-	ENSBTAG00000029119	5S_rRNA	rRNA
30	ANGxSIM	16	62578656	66253552	16	65437883	65655684	217802	+	ENSBTAG00000038079	C16H1orf21	protein_coding
31	ANGxSIM	16	62578656	66253552	16	65719553	65792435	72883	-	ENSBTAG00000019264	EDEM3	protein_coding
32	ANGxSIM	16	62578656	66253552	16	65831839	66012562	180724	-	ENSBTAG00000014548	NIBAN1	protein_coding
33	ANGxSIM	16	62578656	66253552	16	66079548	66123232	43685	+	ENSBTAG00000000023	RNF2	protein_coding
34	ANGxSIM	16	62578656	66253552	16	66131785	66166490	34706	-	ENSBTAG00000011285	TRMT1L	protein_coding
35	ANGxSIM	16	62578656	66253552	16	66173944	66212958	39015	+	ENSBTAG00000004492	SWT1	protein_coding

## Sheet: TOP100
	geneSet	description	link	size	overlap	expect	enrichmentRatio	pValue	FDR	overlapId	userId
1	bta04512	ECM-receptor interaction	http://www.kegg.jp/kegg-bin/show_pathway?bta04512+511043+532572	83	2	0.129828	15.405	0.00715646	1	511043;532572	ENSBTAG00000011966;ENSBTAG00000000793
2	bta05222	Small cell lung cancer	http://www.kegg.jp/kegg-bin/show_pathway?bta05222+511043+532572	94	2	0.147034	13.6023	0.00910347	1	511043;532572	ENSBTAG00000011966;ENSBTAG00000000793
3	bta05146	Amoebiasis	http://www.kegg.jp/kegg-bin/show_pathway?bta05146+511043+532572	101	2	0.157983	12.6596	0.010453	1	511043;532572	ENSBTAG00000011966;ENSBTAG00000000793
4	bta05145	Toxoplasmosis	http://www.kegg.jp/kegg-bin/show_pathway?bta05145+511043+532572	113	2	0.176754	11.3152	0.0129606	1	511043;532572	ENSBTAG00000011966;ENSBTAG00000000793
5	bta00910	Nitrogen metabolism	http://www.kegg.jp/kegg-bin/show_pathway?bta00910+281199	17	1	0.0265913	37.6063	0.0262861	1	281199	ENSBTAG00000013631
6	bta00220	Arginine biosynthesis	http://www.kegg.jp/kegg-bin/show_pathway?bta00220+281199	19	1	0.0297196	33.6478	0.0293363	1	281199	ENSBTAG00000013631
7	bta00514	Other types of O-glycan biosynthesis	http://www.kegg.jp/kegg-bin/show_pathway?bta00514+789150	21	1	0.032848	30.4432	0.0323776	1	789150	ENSBTAG00000035836
8	bta04510	Focal adhesion	http://www.kegg.jp/kegg-bin/show_pathway?bta04510+511043+532572	198	2	0.30971	6.45765	0.0370667	1	511043;532572	ENSBTAG00000011966;ENSBTAG00000000793
9	bta00630	Glyoxylate and dicarboxylate metabolism	http://www.kegg.jp/kegg-bin/show_pathway?bta00630+281199	30	1	0.0469258	21.3103	0.0459552	1	281199	ENSBTAG00000013631
10	bta00760	Nicotinate and nicotinamide metabolism	http://www.kegg.jp/kegg-bin/show_pathway?bta00760+511042	32	1	0.0500541	19.9784	0.0489485	1	511042	ENSBTAG00000000795
11	bta05020	Prion diseases	http://www.kegg.jp/kegg-bin/show_pathway?bta05020+532572	32	1	0.0500541	19.9784	0.0489485	1	532572	ENSBTAG00000011966
12	bta00250	Alanine, aspartate and glutamate metabolism	http://www.kegg.jp/kegg-bin/show_pathway?bta00250+281199	36	1	0.0563109	17.7585	0.054909	1	281199	ENSBTAG00000013631
13	bta04930	Type II diabetes mellitus	http://www.kegg.jp/kegg-bin/show_pathway?bta04930+353113	46	1	0.0719528	13.898	0.0696598	1	353113	ENSBTAG00000020887
14	bta00520	Amino sugar and nucleotide sugar metabolism	http://www.kegg.jp/kegg-bin/show_pathway?bta00520+507597	50	1	0.0782096	12.7862	0.0755004	1	507597	ENSBTAG00000002266
15	bta00310	Lysine degradation	http://www.kegg.jp/kegg-bin/show_pathway?bta00310+789150	64	1	0.100108	9.98918	0.095677	1	789150	ENSBTAG00000035836
16	bta05165	Human papillomavirus infection	http://www.kegg.jp/kegg-bin/show_pathway?bta05165+511043+532572	354	2	0.553724	3.61191	0.103576	1	511043;532572	ENSBTAG00000011966;ENSBTAG00000000793
17	bta01230	Biosynthesis of amino acids	http://www.kegg.jp/kegg-bin/show_pathway?bta01230+281199	73	1	0.114186	8.75764	0.108432	1	281199	ENSBTAG00000013631
18	bta05100	Bacterial invasion of epithelial cells	http://www.kegg.jp/kegg-bin/show_pathway?bta05100+614345	74	1	0.11575	8.63929	0.109839	1	614345	ENSBTAG00000045582
19	bta05140	Leishmaniasis	http://www.kegg.jp/kegg-bin/show_pathway?bta05140+281346	76	1	0.118879	8.41194	0.112647	1	281346	ENSBTAG00000008004
20	bta04151	PI3K-Akt signaling pathway	http://www.kegg.jp/kegg-bin/show_pathway?bta04151+511043+532572	373	2	0.583444	3.42792	0.113116	1	511043;532572	ENSBTAG00000011966;ENSBTAG00000000793
21	bta05132	Salmonella infection	http://www.kegg.jp/kegg-bin/show_pathway?bta05132+614345	85	1	0.132956	7.52127	0.125181	1	614345	ENSBTAG00000045582
22	bta04666	Fc gamma R-mediated phagocytosis	http://www.kegg.jp/kegg-bin/show_pathway?bta04666+614345	87	1	0.136085	7.34836	0.127944	1	614345	ENSBTAG00000045582
23	bta04727	GABAergic synapse	http://www.kegg.jp/kegg-bin/show_pathway?bta04727+281199	87	1	0.136085	7.34836	0.127944	1	281199	ENSBTAG00000013631
24	bta03015	mRNA surveillance pathway	http://www.kegg.jp/kegg-bin/show_pathway?bta03015+537131	95	1	0.148598	6.72955	0.138916	1	537131	ENSBTAG00000008003
25	bta04670	Leukocyte transendothelial migration	http://www.kegg.jp/kegg-bin/show_pathway?bta04670+281346	113	1	0.176754	5.65759	0.163138	1	281346	ENSBTAG00000008004
26	bta04724	Glutamatergic synapse	http://www.kegg.jp/kegg-bin/show_pathway?bta04724+281199	113	1	0.176754	5.65759	0.163138	1	281199	ENSBTAG00000013631
27	bta04380	Osteoclast differentiation	http://www.kegg.jp/kegg-bin/show_pathway?bta04380+281346	133	1	0.208038	4.80682	0.189313	1	281346	ENSBTAG00000008004
28	bta05160	Hepatitis C	http://www.kegg.jp/kegg-bin/show_pathway?bta05160+100048947	139	1	0.217423	4.59934	0.197017	1	100048947	ENSBTAG00000009091
29	bta05418	Fluid shear stress and atherosclerosis	http://www.kegg.jp/kegg-bin/show_pathway?bta05418+281346	145	1	0.226808	4.40902	0.204653	1	281346	ENSBTAG00000008004
30	bta04141	Protein processing in endoplasmic reticulum	http://www.kegg.jp/kegg-bin/show_pathway?bta04141+519058	165	1	0.258092	3.87459	0.229625	1	519058	ENSBTAG00000019264
31	bta04145	Phagosome	http://www.kegg.jp/kegg-bin/show_pathway?bta04145+281346	170	1	0.265913	3.76063	0.235754	1	281346	ENSBTAG00000008004
32	bta04621	NOD-like receptor signaling pathway	http://www.kegg.jp/kegg-bin/show_pathway?bta04621+100048947	176	1	0.275298	3.63243	0.24305	1	100048947	ENSBTAG00000009091
33	bta04217	Necroptosis	http://www.kegg.jp/kegg-bin/show_pathway?bta04217+281199	177	1	0.276862	3.61191	0.244259	1	281199	ENSBTAG00000013631
34	bta05164	Influenza A	http://www.kegg.jp/kegg-bin/show_pathway?bta05164+100048947	180	1	0.281555	3.55171	0.247878	1	100048947	ENSBTAG00000009091
35	bta04020	Calcium signaling pathway	http://www.kegg.jp/kegg-bin/show_pathway?bta04020+353113	192	1	0.300325	3.32973	0.262191	1	353113	ENSBTAG00000020887
36	bta05168	Herpes simplex infection	http://www.kegg.jp/kegg-bin/show_pathway?bta05168+100048947	198	1	0.30971	3.22883	0.269253	1	100048947	ENSBTAG00000009091
37	bta04810	Regulation of actin cytoskeleton	http://www.kegg.jp/kegg-bin/show_pathway?bta04810+614345	210	1	0.32848	3.04432	0.28319	1	614345	ENSBTAG00000045582
38	bta04014	Ras signaling pathway	http://www.kegg.jp/kegg-bin/show_pathway?bta04014+522344	241	1	0.37697	2.65273	0.318067	1	522344	ENSBTAG00000019630
39	bta04144	Endocytosis	http://www.kegg.jp/kegg-bin/show_pathway?bta04144+614345	246	1	0.384791	2.59881	0.323544	1	614345	ENSBTAG00000045582
40	bta04010	MAPK signaling pathway	http://www.kegg.jp/kegg-bin/show_pathway?bta04010+353113	292	1	0.456744	2.18941	0.372055	1	353113	ENSBTAG00000020887

## Sheet: Biological Process
	geneSet	description	link	size	overlap	expect	enrichmentRatio	pValue	FDR	overlapId	userId
1	GO:0010608	posttranscriptional regulation of gene expression	http://amigo.geneontology.org/amigo/term/GO:0010608	230	3	0.357341	8.39534	0.00485099	1	281115;614787;100048947	ENSBTAG00000009091;ENSBTAG00000019821;ENSBTAG00000014548
2	GO:0090305	nucleic acid phosphodiester bond hydrolysis	http://amigo.geneontology.org/amigo/term/GO:0090305	155	2	0.240817	8.30507	0.0233615	1	614118;100048947	ENSBTAG00000009091;ENSBTAG00000016369
3	GO:0034248	regulation of cellular amide metabolic process	http://amigo.geneontology.org/amigo/term/GO:0034248	182	2	0.282766	7.073	0.0314802	1	281115;614787	ENSBTAG00000019821;ENSBTAG00000014548
4	GO:0006520	cellular amino acid metabolic process	http://amigo.geneontology.org/amigo/term/GO:0006520	188	2	0.292087	6.84726	0.0334184	1	281199;511042	ENSBTAG00000013631;ENSBTAG00000000795
5	GO:0006040	amino sugar metabolic process	http://amigo.geneontology.org/amigo/term/GO:0006040	24	1	0.0372878	26.8185	0.0366751	1	507597	ENSBTAG00000002266
6	GO:0051090	regulation of DNA-binding transcription factor activity	http://amigo.geneontology.org/amigo/term/GO:0051090	209	2	0.324714	6.15926	0.0405644	1	281115;540090	ENSBTAG00000019821;ENSBTAG00000000023
7	GO:0008380	RNA splicing	http://amigo.geneontology.org/amigo/term/GO:0008380	219	2	0.340251	5.87802	0.0441575	1	281115;614118	ENSBTAG00000019821;ENSBTAG00000016369
8	GO:0034762	regulation of transmembrane transport	http://amigo.geneontology.org/amigo/term/GO:0034762	220	2	0.341804	5.8513	0.0445234	1	353113;100048947	ENSBTAG00000020887;ENSBTAG00000009091
9	GO:0043462	regulation of ATPase activity	http://amigo.geneontology.org/amigo/term/GO:0043462	38	1	0.059039	16.938	0.057488	1	281115	ENSBTAG00000019821
10	GO:0048144	fibroblast proliferation	http://amigo.geneontology.org/amigo/term/GO:0048144	38	1	0.059039	16.938	0.057488	1	281115	ENSBTAG00000019821
11	GO:0010638	positive regulation of organelle organization	http://amigo.geneontology.org/amigo/term/GO:0010638	298	2	0.46299	4.31975	0.0763599	1	528041;614345	ENSBTAG00000031238;ENSBTAG00000045582
12	GO:0034660	ncRNA metabolic process	http://amigo.geneontology.org/amigo/term/GO:0034660	302	2	0.469204	4.26254	0.0781518	1	540872;614118	ENSBTAG00000016369;ENSBTAG00000011285
13	GO:0032504	multicellular organism reproduction	http://amigo.geneontology.org/amigo/term/GO:0032504	323	2	0.501831	3.9854	0.0877833	1	528041;540090	ENSBTAG00000031238;ENSBTAG00000000023
14	GO:0043648	dicarboxylic acid metabolic process	http://amigo.geneontology.org/amigo/term/GO:0043648	59	1	0.0916657	10.9092	0.0879257	1	511042	ENSBTAG00000000795
15	GO:0051345	positive regulation of hydrolase activity	http://amigo.geneontology.org/amigo/term/GO:0051345	332	2	0.515814	3.87737	0.0920212	1	281115;282035	ENSBTAG00000004305;ENSBTAG00000019821
16	GO:0009743	response to carbohydrate	http://amigo.geneontology.org/amigo/term/GO:0009743	62	1	0.0963267	10.3813	0.0921986	1	281199	ENSBTAG00000013631
17	GO:0016071	mRNA metabolic process	http://amigo.geneontology.org/amigo/term/GO:0016071	359	2	0.557763	3.58575	0.105103	1	281115;100048947	ENSBTAG00000009091;ENSBTAG00000019821
18	GO:0008643	carbohydrate transport	http://amigo.geneontology.org/amigo/term/GO:0008643	73	1	0.113417	8.81703	0.107708	1	100048947	ENSBTAG00000009091
19	GO:0072524	pyridine-containing compound metabolic process	http://amigo.geneontology.org/amigo/term/GO:0072524	76	1	0.118078	8.46898	0.111894	1	511042	ENSBTAG00000000795
20	GO:1901136	carbohydrate derivative catabolic process	http://amigo.geneontology.org/amigo/term/GO:1901136	79	1	0.122739	8.14738	0.116063	1	507597	ENSBTAG00000002266
21	GO:0044703	multi-organism reproductive process	http://amigo.geneontology.org/amigo/term/GO:0044703	384	2	0.596604	3.35231	0.117667	1	528041;540090	ENSBTAG00000031238;ENSBTAG00000000023
22	GO:0016458	gene silencing	http://amigo.geneontology.org/amigo/term/GO:0016458	86	1	0.133614	7.48422	0.125719	1	281115	ENSBTAG00000019821
23	GO:0042157	lipoprotein metabolic process	http://amigo.geneontology.org/amigo/term/GO:0042157	87	1	0.135168	7.39819	0.127091	1	281199	ENSBTAG00000013631
24	GO:0051050	positive regulation of transport	http://amigo.geneontology.org/amigo/term/GO:0051050	403	2	0.626124	3.19426	0.127477	1	281115;100048947	ENSBTAG00000009091;ENSBTAG00000019821
25	GO:0006403	RNA localization	http://amigo.geneontology.org/amigo/term/GO:0006403	99	1	0.153812	6.50144	0.143393	1	281115	ENSBTAG00000019821
26	GO:0040029	regulation of gene expression, epigenetic	http://amigo.geneontology.org/amigo/term/GO:0040029	102	1	0.158473	6.31022	0.147424	1	281115	ENSBTAG00000019821
27	GO:0009451	RNA modification	http://amigo.geneontology.org/amigo/term/GO:0009451	105	1	0.163134	6.12993	0.151437	1	540872	ENSBTAG00000011285
28	GO:0006518	peptide metabolic process	http://amigo.geneontology.org/amigo/term/GO:0006518	469	2	0.728665	2.74475	0.163037	1	281115;614787	ENSBTAG00000019821;ENSBTAG00000014548
29	GO:0043604	amide biosynthetic process	http://amigo.geneontology.org/amigo/term/GO:0043604	473	2	0.73488	2.72153	0.165256	1	281115;614787	ENSBTAG00000019821;ENSBTAG00000014548
30	GO:0015931	nucleobase-containing compound transport	http://amigo.geneontology.org/amigo/term/GO:0015931	119	1	0.184885	5.40876	0.169936	1	281115	ENSBTAG00000019821
31	GO:0045444	fat cell differentiation	http://amigo.geneontology.org/amigo/term/GO:0045444	129	1	0.200422	4.98948	0.182919	1	100048947	ENSBTAG00000009091
32	GO:0048511	rhythmic process	http://amigo.geneontology.org/amigo/term/GO:0048511	129	1	0.200422	4.98948	0.182919	1	281115	ENSBTAG00000019821
33	GO:0071496	cellular response to external stimulus	http://amigo.geneontology.org/amigo/term/GO:0071496	131	1	0.203529	4.9133	0.185493	1	281199	ENSBTAG00000013631
34	GO:0043543	protein acylation	http://amigo.geneontology.org/amigo/term/GO:0043543	136	1	0.211297	4.73267	0.191895	1	281199	ENSBTAG00000013631
35	GO:0071103	DNA conformation change	http://amigo.geneontology.org/amigo/term/GO:0071103	138	1	0.214405	4.66408	0.194442	1	281115	ENSBTAG00000019821
36	GO:0034976	response to endoplasmic reticulum stress	http://amigo.geneontology.org/amigo/term/GO:0034976	144	1	0.223727	4.46974	0.202041	1	614787	ENSBTAG00000014548
37	GO:0090130	tissue migration	http://amigo.geneontology.org/amigo/term/GO:0090130	144	1	0.223727	4.46974	0.202041	1	281199	ENSBTAG00000013631
38	GO:0051258	protein polymerization	http://amigo.geneontology.org/amigo/term/GO:0051258	148	1	0.229941	4.34894	0.207069	1	614345	ENSBTAG00000045582
39	GO:0071826	ribonucleoprotein complex subunit organization	http://amigo.geneontology.org/amigo/term/GO:0071826	166	1	0.257907	3.87737	0.229335	1	281115	ENSBTAG00000019821
40	GO:0051169	nuclear transport	http://amigo.geneontology.org/amigo/term/GO:0051169	173	1	0.268783	3.72048	0.237836	1	281115	ENSBTAG00000019821
41	GO:0033044	regulation of chromosome organization	http://amigo.geneontology.org/amigo/term/GO:0033044	175	1	0.27189	3.67796	0.240249	1	528041	ENSBTAG00000031238
42	GO:0051098	regulation of binding	http://amigo.geneontology.org/amigo/term/GO:0051098	176	1	0.273444	3.65706	0.241453	1	281115	ENSBTAG00000019821
43	GO:0009991	response to extracellular stimulus	http://amigo.geneontology.org/amigo/term/GO:0009991	178	1	0.276551	3.61597	0.243855	1	281199	ENSBTAG00000013631
44	GO:0043900	regulation of multi-organism process	http://amigo.geneontology.org/amigo/term/GO:0043900	190	1	0.295195	3.38759	0.258121	1	100048947	ENSBTAG00000009091
45	GO:0044419	interspecies interaction between organisms	http://amigo.geneontology.org/amigo/term/GO:0044419	190	1	0.295195	3.38759	0.258121	1	100048947	ENSBTAG00000009091
46	GO:0032259	methylation	http://amigo.geneontology.org/amigo/term/GO:0032259	194	1	0.301409	3.31775	0.26282	1	540872	ENSBTAG00000011285
47	GO:0001667	ameboidal-type cell migration	http://amigo.geneontology.org/amigo/term/GO:0001667	195	1	0.302963	3.30073	0.263991	1	281199	ENSBTAG00000013631
48	GO:0043087	regulation of GTPase activity	http://amigo.geneontology.org/amigo/term/GO:0043087	203	1	0.315392	3.17065	0.273293	1	282035	ENSBTAG00000004305
49	GO:0044282	small molecule catabolic process	http://amigo.geneontology.org/amigo/term/GO:0044282	203	1	0.315392	3.17065	0.273293	1	507597	ENSBTAG00000002266
50	GO:0072511	divalent inorganic cation transport	http://amigo.geneontology.org/amigo/term/GO:0072511	224	1	0.348019	2.87341	0.297195	1	353113	ENSBTAG00000020887
51	GO:0007389	pattern specification process	http://amigo.geneontology.org/amigo/term/GO:0007389	228	1	0.354234	2.82299	0.301664	1	540090	ENSBTAG00000000023
52	GO:0090066	regulation of anatomical structure size	http://amigo.geneontology.org/amigo/term/GO:0090066	242	1	0.375985	2.65968	0.317099	1	614345	ENSBTAG00000045582
53	GO:0044270	cellular nitrogen compound catabolic process	http://amigo.geneontology.org/amigo/term/GO:0044270	244	1	0.379092	2.63788	0.319278	1	100048947	ENSBTAG00000009091
54	GO:0046700	heterocycle catabolic process	http://amigo.geneontology.org/amigo/term/GO:0046700	245	1	0.380646	2.62711	0.320365	1	100048947	ENSBTAG00000009091
55	GO:0019439	aromatic compound catabolic process	http://amigo.geneontology.org/amigo/term/GO:0019439	253	1	0.393075	2.54404	0.329003	1	100048947	ENSBTAG00000009091
56	GO:0051493	regulation of cytoskeleton organization	http://amigo.geneontology.org/amigo/term/GO:0051493	256	1	0.397736	2.51423	0.332216	1	614345	ENSBTAG00000045582
57	GO:0010563	negative regulation of phosphorus metabolic process	http://amigo.geneontology.org/amigo/term/GO:0010563	258	1	0.400843	2.49474	0.33435	1	614787	ENSBTAG00000014548
58	GO:0002790	peptide secretion	http://amigo.geneontology.org/amigo/term/GO:0002790	266	1	0.413273	2.41971	0.342824	1	281115	ENSBTAG00000019821
59	GO:0007610	behavior	http://amigo.geneontology.org/amigo/term/GO:0007610	266	1	0.413273	2.41971	0.342824	1	540872	ENSBTAG00000011285
60	GO:1901361	organic cyclic compound catabolic process	http://amigo.geneontology.org/amigo/term/GO:1901361	267	1	0.414826	2.41065	0.343876	1	100048947	ENSBTAG00000009091
61	GO:0043269	regulation of ion transport	http://amigo.geneontology.org/amigo/term/GO:0043269	275	1	0.427256	2.34052	0.352236	1	353113	ENSBTAG00000020887
62	GO:0022613	ribonucleoprotein complex biogenesis	http://amigo.geneontology.org/amigo/term/GO:0022613	289	1	0.449007	2.22714	0.36663	1	281115	ENSBTAG00000019821
63	GO:0051186	cofactor metabolic process	http://amigo.geneontology.org/amigo/term/GO:0051186	289	1	0.449007	2.22714	0.36663	1	511042	ENSBTAG00000000795
64	GO:0031400	negative regulation of protein modification process	http://amigo.geneontology.org/amigo/term/GO:0031400	293	1	0.455221	2.19673	0.370687	1	614787	ENSBTAG00000014548
65	GO:0090407	organophosphate biosynthetic process	http://amigo.geneontology.org/amigo/term/GO:0090407	300	1	0.466097	2.14548	0.37773	1	511042	ENSBTAG00000000795
66	GO:0045087	innate immune response	http://amigo.geneontology.org/amigo/term/GO:0045087	301	1	0.467651	2.13835	0.37873	1	281115	ENSBTAG00000019821
67	GO:0003006	developmental process involved in reproduction	http://amigo.geneontology.org/amigo/term/GO:0003006	303	1	0.470758	2.12423	0.380725	1	540090	ENSBTAG00000000023
68	GO:0090087	regulation of peptide transport	http://amigo.geneontology.org/amigo/term/GO:0090087	303	1	0.470758	2.12423	0.380725	1	281115	ENSBTAG00000019821
69	GO:0006954	inflammatory response	http://amigo.geneontology.org/amigo/term/GO:0006954	306	1	0.475419	2.10341	0.383708	1	281115	ENSBTAG00000019821
70	GO:0048598	embryonic morphogenesis	http://amigo.geneontology.org/amigo/term/GO:0048598	306	1	0.475419	2.10341	0.383708	1	540090	ENSBTAG00000000023
71	GO:0005975	carbohydrate metabolic process	http://amigo.geneontology.org/amigo/term/GO:0005975	307	1	0.476973	2.09656	0.384699	1	507597	ENSBTAG00000002266
72	GO:0099536	synaptic signaling	http://amigo.geneontology.org/amigo/term/GO:0099536	307	1	0.476973	2.09656	0.384699	1	353113	ENSBTAG00000020887
73	GO:0080135	regulation of cellular response to stress	http://amigo.geneontology.org/amigo/term/GO:0080135	318	1	0.494063	2.02403	0.395505	1	281115	ENSBTAG00000019821
74	GO:0014070	response to organic cyclic compound	http://amigo.geneontology.org/amigo/term/GO:0014070	324	1	0.503385	1.98655	0.401324	1	281115	ENSBTAG00000019821
75	GO:0001816	cytokine production	http://amigo.geneontology.org/amigo/term/GO:0001816	346	1	0.537565	1.86024	0.42222	1	281115	ENSBTAG00000019821
76	GO:0051046	regulation of secretion	http://amigo.geneontology.org/amigo/term/GO:0051046	349	1	0.542226	1.84425	0.425016	1	281115	ENSBTAG00000019821
77	GO:0002252	immune effector process	http://amigo.geneontology.org/amigo/term/GO:0002252	350	1	0.54378	1.83898	0.425945	1	100048947	ENSBTAG00000009091
78	GO:0097435	supramolecular fiber organization	http://amigo.geneontology.org/amigo/term/GO:0097435	361	1	0.56087	1.78294	0.436076	1	614345	ENSBTAG00000045582
79	GO:0098657	import into cell	http://amigo.geneontology.org/amigo/term/GO:0098657	362	1	0.562424	1.77802	0.436989	1	281346	ENSBTAG00000008004
80	GO:0030029	actin filament-based process	http://amigo.geneontology.org/amigo/term/GO:0030029	364	1	0.565531	1.76825	0.43881	1	614345	ENSBTAG00000045582
81	GO:0072358	cardiovascular system development	http://amigo.geneontology.org/amigo/term/GO:0072358	371	1	0.576407	1.73489	0.445142	1	281199	ENSBTAG00000013631
82	GO:0044283	small molecule biosynthetic process	http://amigo.geneontology.org/amigo/term/GO:0044283	387	1	0.601265	1.66316	0.459366	1	281199	ENSBTAG00000013631
83	GO:0060341	regulation of cellular localization	http://amigo.geneontology.org/amigo/term/GO:0060341	391	1	0.60748	1.64615	0.462868	1	281115	ENSBTAG00000019821
84	GO:0006325	chromatin organization	http://amigo.geneontology.org/amigo/term/GO:0006325	395	1	0.613694	1.62948	0.46635	1	540090	ENSBTAG00000000023
85	GO:0017144	drug metabolic process	http://amigo.geneontology.org/amigo/term/GO:0017144	402	1	0.62457	1.6011	0.472392	1	507597	ENSBTAG00000002266
86	GO:0055086	nucleobase-containing small molecule metabolic process	http://amigo.geneontology.org/amigo/term/GO:0055086	404	1	0.627677	1.59318	0.474107	1	511042	ENSBTAG00000000795
87	GO:0009894	regulation of catabolic process	http://amigo.geneontology.org/amigo/term/GO:0009894	409	1	0.635446	1.5737	0.478371	1	100048947	ENSBTAG00000009091
88	GO:0006974	cellular response to DNA damage stimulus	http://amigo.geneontology.org/amigo/term/GO:0006974	412	1	0.640107	1.56224	0.480914	1	281115	ENSBTAG00000019821
89	GO:1901698	response to nitrogen compound	http://amigo.geneontology.org/amigo/term/GO:1901698	413	1	0.64166	1.55846	0.481759	1	281115	ENSBTAG00000019821
90	GO:0008284	positive regulation of cell proliferation	http://amigo.geneontology.org/amigo/term/GO:0008284	418	1	0.649428	1.53982	0.485966	1	281115	ENSBTAG00000019821
91	GO:0030001	metal ion transport	http://amigo.geneontology.org/amigo/term/GO:0030001	425	1	0.660304	1.51445	0.491802	1	353113	ENSBTAG00000020887
92	GO:0032880	regulation of protein localization	http://amigo.geneontology.org/amigo/term/GO:0032880	426	1	0.661858	1.5109	0.49263	1	281115	ENSBTAG00000019821
93	GO:0035239	tube morphogenesis	http://amigo.geneontology.org/amigo/term/GO:0035239	429	1	0.666519	1.50033	0.495109	1	281199	ENSBTAG00000013631
94	GO:0000122	negative regulation of transcription by RNA polymerase II	http://amigo.geneontology.org/amigo/term/GO:0000122	435	1	0.675841	1.47964	0.500032	1	540090	ENSBTAG00000000023
95	GO:0032446	protein modification by small protein conjugation	http://amigo.geneontology.org/amigo/term/GO:0032446	436	1	0.677394	1.47625	0.500848	1	540090	ENSBTAG00000000023
96	GO:0032940	secretion by cell	http://amigo.geneontology.org/amigo/term/GO:0032940	436	1	0.677394	1.47625	0.500848	1	281115	ENSBTAG00000019821
97	GO:0034097	response to cytokine	http://amigo.geneontology.org/amigo/term/GO:0034097	436	1	0.677394	1.47625	0.500848	1	281115	ENSBTAG00000019821
98	GO:0051270	regulation of cellular component movement	http://amigo.geneontology.org/amigo/term/GO:0051270	439	1	0.682055	1.46616	0.503289	1	281199	ENSBTAG00000013631
99	GO:0098660	inorganic ion transmembrane transport	http://amigo.geneontology.org/amigo/term/GO:0098660	442	1	0.686716	1.45621	0.505719	1	353113	ENSBTAG00000020887
100	GO:0098655	cation transmembrane transport	http://amigo.geneontology.org/amigo/term/GO:0098655	445	1	0.691377	1.44639	0.508138	1	353113	ENSBTAG00000020887

## Sheet: Cellular Component
	geneSet	description	link	size	overlap	expect	enrichmentRatio	pValue	FDR	overlapId	userId
1	GO:0015629	actin cytoskeleton	http://amigo.geneontology.org/amigo/term/GO:0015629	230	2	0.29563	6.76522	0.0328624	0.899881	281115;614345	ENSBTAG00000019821;ENSBTAG00000045582
2	GO:0031519	PcG protein complex	http://amigo.geneontology.org/amigo/term/GO:0031519	26	1	0.033419	29.9231	0.0329527	0.899881	540090	ENSBTAG00000000023
3	GO:0005844	polysome	http://amigo.geneontology.org/amigo/term/GO:0005844	37	1	0.0475578	21.027	0.0466057	0.899881	281115	ENSBTAG00000019821
4	GO:0098797	plasma membrane protein complex	http://amigo.geneontology.org/amigo/term/GO:0098797	287	2	0.368895	5.4216	0.0493532	0.899881	281346;353113	ENSBTAG00000020887;ENSBTAG00000008004
5	GO:0090734	site of DNA damage	http://amigo.geneontology.org/amigo/term/GO:0090734	42	1	0.0539846	18.5238	0.0527556	0.899881	614345	ENSBTAG00000045582
6	GO:0000228	nuclear chromosome	http://amigo.geneontology.org/amigo/term/GO:0000228	302	2	0.388175	5.15232	0.0541261	0.899881	281115;540090	ENSBTAG00000019821;ENSBTAG00000000023
7	GO:0000785	chromatin	http://amigo.geneontology.org/amigo/term/GO:0000785	304	2	0.390746	5.11842	0.0547754	0.899881	281115;540090	ENSBTAG00000019821;ENSBTAG00000000023
8	GO:0016604	nuclear body	http://amigo.geneontology.org/amigo/term/GO:0016604	368	2	0.473008	4.22826	0.0770367	1	281115;540090	ENSBTAG00000019821;ENSBTAG00000000023
9	GO:1990204	oxidoreductase complex	http://amigo.geneontology.org/amigo/term/GO:1990204	92	1	0.118252	8.45652	0.112372	1	281346	ENSBTAG00000008004
10	GO:0043209	myelin sheath	http://amigo.geneontology.org/amigo/term/GO:0043209	109	1	0.140103	7.13761	0.131879	1	281199	ENSBTAG00000013631
11	GO:0035770	ribonucleoprotein granule	http://amigo.geneontology.org/amigo/term/GO:0035770	114	1	0.14653	6.82456	0.137545	1	281115	ENSBTAG00000019821
12	GO:1990351	transporter complex	http://amigo.geneontology.org/amigo/term/GO:1990351	160	1	0.205656	4.8625	0.18817	1	353113	ENSBTAG00000020887
13	GO:0044297	cell body	http://amigo.geneontology.org/amigo/term/GO:0044297	170	1	0.218509	4.57647	0.198824	1	281199	ENSBTAG00000013631
14	GO:0005819	spindle	http://amigo.geneontology.org/amigo/term/GO:0005819	186	1	0.239075	4.1828	0.215617	1	528041	ENSBTAG00000031238
15	GO:0005840	ribosome	http://amigo.geneontology.org/amigo/term/GO:0005840	197	1	0.253213	3.94924	0.226983	1	281115	ENSBTAG00000019821
16	GO:0030424	axon	http://amigo.geneontology.org/amigo/term/GO:0030424	229	1	0.294344	3.39738	0.259232	1	511042	ENSBTAG00000000795
17	GO:0012506	vesicle membrane	http://amigo.geneontology.org/amigo/term/GO:0012506	230	1	0.29563	3.38261	0.260221	1	511042	ENSBTAG00000000795
18	GO:0005815	microtubule organizing center	http://amigo.geneontology.org/amigo/term/GO:0005815	371	1	0.476864	2.09704	0.388569	1	281115	ENSBTAG00000019821
19	GO:0044431	Golgi apparatus part	http://amigo.geneontology.org/amigo/term/GO:0044431	376	1	0.48329	2.06915	0.392737	1	511042	ENSBTAG00000000795
20	GO:0044433	cytoplasmic vesicle part	http://amigo.geneontology.org/amigo/term/GO:0044433	393	1	0.505141	1.97964	0.406725	1	511042	ENSBTAG00000000795
21	GO:0005768	endosome	http://amigo.geneontology.org/amigo/term/GO:0005768	426	1	0.547558	1.82629	0.433075	1	511042	ENSBTAG00000000795
22	GO:0005730	nucleolus	http://amigo.geneontology.org/amigo/term/GO:0005730	491	1	0.631105	1.58452	0.481998	1	281115	ENSBTAG00000019821
23	GO:1990234	transferase complex	http://amigo.geneontology.org/amigo/term/GO:1990234	493	1	0.633676	1.57809	0.483443	1	540090	ENSBTAG00000000023

## Sheet: Molecular Function
	geneSet	description	link	size	overlap	expect	enrichmentRatio	pValue	FDR	overlapId	userId
1	GO:0140098	catalytic activity, acting on RNA	http://amigo.geneontology.org/amigo/term/GO:0140098	238	4	0.388693	10.2909	0.000450363	0.0752106	281115;540872;614118;100048947	ENSBTAG00000009091;ENSBTAG00000019821;ENSBTAG00000016369;ENSBTAG00000011285
2	GO:0043021	ribonucleoprotein complex binding	http://amigo.geneontology.org/amigo/term/GO:0043021	71	2	0.115955	17.2481	0.00574214	0.479468	281115;100048947	ENSBTAG00000009091;ENSBTAG00000019821
3	GO:0003725	double-stranded RNA binding	http://amigo.geneontology.org/amigo/term/GO:0003725	34	1	0.0555276	18.009	0.0541664	1	281115	ENSBTAG00000019821
4	GO:0070063	RNA polymerase binding	http://amigo.geneontology.org/amigo/term/GO:0070063	34	1	0.0555276	18.009	0.0541664	1	281115	ENSBTAG00000019821
5	GO:0008047	enzyme activator activity	http://amigo.geneontology.org/amigo/term/GO:0008047	235	2	0.383794	5.21113	0.0546501	1	281346;282035	ENSBTAG00000004305;ENSBTAG00000008004
6	GO:0000049	tRNA binding	http://amigo.geneontology.org/amigo/term/GO:0000049	37	1	0.0604271	16.5489	0.0588134	1	540872	ENSBTAG00000011285
7	GO:0003682	chromatin binding	http://amigo.geneontology.org/amigo/term/GO:0003682	271	2	0.442588	4.51888	0.0703603	1	281115;540090	ENSBTAG00000019821;ENSBTAG00000000023
8	GO:0003727	single-stranded RNA binding	http://amigo.geneontology.org/amigo/term/GO:0003727	52	1	0.0849246	11.7751	0.0817336	1	281115	ENSBTAG00000019821
9	GO:0003697	single-stranded DNA binding	http://amigo.geneontology.org/amigo/term/GO:0003697	63	1	0.102889	9.71917	0.0982131	1	281115	ENSBTAG00000019821
10	GO:0004386	helicase activity	http://amigo.geneontology.org/amigo/term/GO:0004386	73	1	0.119221	8.38778	0.112957	1	281115	ENSBTAG00000019821
11	GO:0016779	nucleotidyltransferase activity	http://amigo.geneontology.org/amigo/term/GO:0016779	84	1	0.137186	7.28938	0.128918	1	511042	ENSBTAG00000000795
12	GO:0016788	hydrolase activity, acting on ester bonds	http://amigo.geneontology.org/amigo/term/GO:0016788	432	2	0.705528	2.83476	0.154595	1	614118;100048947	ENSBTAG00000009091;ENSBTAG00000016369
13	GO:0140097	catalytic activity, acting on DNA	http://amigo.geneontology.org/amigo/term/GO:0140097	104	1	0.169849	5.88757	0.157261	1	281115	ENSBTAG00000019821
14	GO:0016874	ligase activity	http://amigo.geneontology.org/amigo/term/GO:0016874	107	1	0.174749	5.7225	0.161439	1	281199	ENSBTAG00000013631
15	GO:0003729	mRNA binding	http://amigo.geneontology.org/amigo/term/GO:0003729	128	1	0.209045	4.78365	0.190149	1	281115	ENSBTAG00000019821
16	GO:0016741	transferase activity, transferring one-carbon groups	http://amigo.geneontology.org/amigo/term/GO:0016741	131	1	0.213945	4.6741	0.194175	1	540872	ENSBTAG00000011285
17	GO:0016829	lyase activity	http://amigo.geneontology.org/amigo/term/GO:0016829	133	1	0.217211	4.60382	0.196849	1	507597	ENSBTAG00000002266
18	GO:0060589	nucleoside-triphosphatase regulator activity	http://amigo.geneontology.org/amigo/term/GO:0060589	146	1	0.238442	4.19389	0.214032	1	282035	ENSBTAG00000004305
19	GO:0016746	transferase activity, transferring acyl groups	http://amigo.geneontology.org/amigo/term/GO:0016746	154	1	0.251508	3.97602	0.224437	1	281199	ENSBTAG00000013631
20	GO:0016757	transferase activity, transferring glycosyl groups	http://amigo.geneontology.org/amigo/term/GO:0016757	162	1	0.264573	3.77968	0.234714	1	789150	ENSBTAG00000035836
21	GO:0019787	ubiquitin-like protein transferase activity	http://amigo.geneontology.org/amigo/term/GO:0019787	224	1	0.365829	2.73352	0.310204	1	540090	ENSBTAG00000000023
22	GO:0016887	ATPase activity	http://amigo.geneontology.org/amigo/term/GO:0016887	236	1	0.385427	2.59452	0.323996	1	281115	ENSBTAG00000019821
23	GO:0003712	transcription coregulator activity	http://amigo.geneontology.org/amigo/term/GO:0003712	246	1	0.401759	2.48906	0.335294	1	281115	ENSBTAG00000019821
24	GO:0022803	passive transmembrane transporter activity	http://amigo.geneontology.org/amigo/term/GO:0022803	250	1	0.408291	2.44923	0.339764	1	353113	ENSBTAG00000020887
25	GO:0019904	protein domain specific binding	http://amigo.geneontology.org/amigo/term/GO:0019904	316	1	0.51608	1.93768	0.409632	1	540090	ENSBTAG00000000023
26	GO:0005509	calcium ion binding	http://amigo.geneontology.org/amigo/term/GO:0005509	359	1	0.586307	1.70559	0.451409	1	353113	ENSBTAG00000020887
27	GO:0008324	cation transmembrane transporter activity	http://amigo.geneontology.org/amigo/term/GO:0008324	377	1	0.615704	1.62416	0.468073	1	353113	ENSBTAG00000020887
28	GO:0016773	phosphotransferase activity, alcohol group as acceptor	http://amigo.geneontology.org/amigo/term/GO:0016773	377	1	0.615704	1.62416	0.468073	1	100048947	ENSBTAG00000009091
29	GO:0008270	zinc ion binding	http://amigo.geneontology.org/amigo/term/GO:0008270	415	1	0.677764	1.47544	0.501729	1	540090	ENSBTAG00000000023
30	GO:0016301	kinase activity	http://amigo.geneontology.org/amigo/term/GO:0016301	428	1	0.698995	1.43063	0.512783	1	100048947	ENSBTAG00000009091
31	GO:1990837	sequence-specific double-stranded DNA binding	http://amigo.geneontology.org/amigo/term/GO:1990837	451	1	0.736558	1.35767	0.531789	1	281115	ENSBTAG00000019821
32	GO:0008092	cytoskeletal protein binding	http://amigo.geneontology.org/amigo/term/GO:0008092	465	1	0.759422	1.31679	0.54302	1	614345	ENSBTAG00000045582
33	GO:0015318	inorganic molecular entity transmembrane transporter activity	http://amigo.geneontology.org/amigo/term/GO:0015318	484	1	0.790452	1.2651	0.557865	1	353113	ENSBTAG00000020887
34	GO:0001067	regulatory region nucleic acid binding	http://amigo.geneontology.org/amigo/term/GO:0001067	500	1	0.816583	1.22462	0.570019	1	281115	ENSBTAG00000019821
